# Supplementary material for: Interventions for mental health problems in children and adults with severe intellectual disabilities: a systematic review
Source: PubMed Central journal article supplement — BMJ Open. 2018 Jun 19;8(6):e021911. doi: 10.1136/bmjopen-2018-021911 (PMC6020952; doi:10.1136/bmjopen-2018-021911), 2018-06-19
Supplement: bmjopen-2018-021911.draft_revisions.pdf [file bmjopen-2018-021911.draft_revisions.pdf]

# BMJ Open

BMJ Open is committed to open peer review. As part of this commitment we make the peer review history of every article we publish publicly available.

When an article is published we post the peer reviewers' comments and the authors' responses online. We also post the versions of the paper that were used during peer review. These are the versions that the peer review comments apply to.

The versions of the paper that follow are the versions that were submitted during the peer review process. They are not the versions of record or the final published versions. They should not be cited or distributed as the published version of this manuscript.

BMJ Open is an open access journal and the full, final, typeset and author-corrected version of record of the manuscript is available on our site with no access controls, subscription charges or pay-per-view fees (<http://bmjopen.bmj.com>).

If you have any questions on BMJ Open's open peer review process please email [info.bmjopen@bmj.com](mailto:info.bmjopen@bmj.com)

# BMJ Open

## Interventions for mental health problems in children and adults with severe intellectual disabilities: A systematic review

|                               |                                                                                                                                                                                                                                                                                                                                                                                                                                                                                                                                                                                                                                                                                                                                                                                                                                                                                                                                                                                                                 |
|-------------------------------|-----------------------------------------------------------------------------------------------------------------------------------------------------------------------------------------------------------------------------------------------------------------------------------------------------------------------------------------------------------------------------------------------------------------------------------------------------------------------------------------------------------------------------------------------------------------------------------------------------------------------------------------------------------------------------------------------------------------------------------------------------------------------------------------------------------------------------------------------------------------------------------------------------------------------------------------------------------------------------------------------------------------|
| Journal:                      | <i>BMJ Open</i>                                                                                                                                                                                                                                                                                                                                                                                                                                                                                                                                                                                                                                                                                                                                                                                                                                                                                                                                                                                                 |
| Manuscript ID                 | bmjopen-2018-021911                                                                                                                                                                                                                                                                                                                                                                                                                                                                                                                                                                                                                                                                                                                                                                                                                                                                                                                                                                                             |
| Article Type:                 | Research                                                                                                                                                                                                                                                                                                                                                                                                                                                                                                                                                                                                                                                                                                                                                                                                                                                                                                                                                                                                        |
| Date Submitted by the Author: | 26-Jan-2018                                                                                                                                                                                                                                                                                                                                                                                                                                                                                                                                                                                                                                                                                                                                                                                                                                                                                                                                                                                                     |
| Complete List of Authors:     | Vereenooghe, Leen; Bielefeld University, Faculty of Psychology and Sports Science<br>Flynn, Samantha; University of Warwick, Centre for Educational Development, Appraisal and Research<br>Hastings, Richard; University of Warwick,<br>Adams, Dawn; Griffith University, Autism Centre of Excellence<br>Chauhan, Umesh; University of Central Lancashire, School of Nursing, Faculty of Health & Wellbeing<br>Cooper, Sally-Ann; Glasgow University, Institute of Health and Wellbeing<br>Gore, Nick; University of Kent, Tizard Centre<br>Hatton, Chris; Lancaster University<br>Hood, Kerensa<br>Jahoda, Andrew; University of Glasgow, Institute of Health and Wellbeing<br>Langdon, PE; Tizard Centre, University of Kent<br>McNamara, Rachel; Cardiff University, Centre for Trials Research<br>Oliver, Chris; University of Birmingham, School of Psychology<br>Roy, Ashok; Coventry and Warwickshire Partnership NHS Trust<br>Totsika, Vasiliki; University of Warwick<br>Waite, Jane; Aston University |
| Keywords:                     | MENTAL HEALTH, intellectual disabilities, systematic review, psychological therapies, pharmacotherapies                                                                                                                                                                                                                                                                                                                                                                                                                                                                                                                                                                                                                                                                                                                                                                                                                                                                                                         |
|                               |                                                                                                                                                                                                                                                                                                                                                                                                                                                                                                                                                                                                                                                                                                                                                                                                                                                                                                                                                                                                                 |

SCHOLARONE™  
Manuscripts

1  
2  
3  
4 **Interventions for mental health problems in children and adults with severe intellectual**  
5 **disabilities: A systematic review.**  
6  
7

8 Dr Leen Vereenooghe<sup>1</sup>, Ms Samantha Flynn<sup>2</sup>, Prof. Richard P Hastings<sup>2,3</sup>, Dr Dawn Adams<sup>4</sup>, Dr  
9 Umesh Chauhan<sup>5,6</sup>, Prof. Sally-Ann Cooper<sup>7</sup>, Dr Nick Gore<sup>8</sup>, Prof. Chris Hatton<sup>9</sup>, Prof. Kerry Hood<sup>10</sup>,  
10 Prof. Andrew Jahoda<sup>7</sup>, Prof Dr Peter E Langdon<sup>8</sup>, Dr Rachel McNamara<sup>10</sup>, Prof. Chris Oliver<sup>11</sup>, Dr  
11 Ashok Roy<sup>12</sup>, Dr Vasiliki Totsika<sup>3, 13</sup> and Dr Jane Waite<sup>14</sup>  
12  
13  
14  
15  
16  
17

18 <sup>1</sup> Faculty of Psychology and Sports Science, Bielefeld University, Germany  
19

20 <sup>2</sup> CEDAR, University of Warwick, UK  
21

22 <sup>3</sup> Centre for Developmental Psychiatry and Psychology, Department of Psychiatry, School of Clinical  
23 Sciences at Monash Health, Monash University  
24

25 <sup>4</sup> Autism Centre of Excellence, Griffith University, Brisbane, Australia  
26

27 <sup>5</sup> School of Nursing, Faculty of Health & Wellbeing, University of Central Lancashire, Preston, UK  
28

29 <sup>6</sup> MacKenzie Chair in Primary Care Medicine, University of Central Lancashire; GP and CVD Lead,  
30 East Lancashire Clinical Commissioning Group, UK  
31

32 <sup>7</sup> Institute of Health and Wellbeing, University of Glasgow, UK  
33

34 <sup>8</sup> Tizard Centre, University of Kent, Canterbury, UK  
35

36 <sup>9</sup> Faculty of Health and Medicine, Lancaster University, UK  
37

38 <sup>10</sup> Centre for Trials Research, Cardiff University, UK  
39

40 <sup>11</sup> School of Psychology, University of Birmingham, UK  
41

42 <sup>12</sup> Coventry and Warwickshire Partnership NHS Trust, UK  
43

44 <sup>13</sup> CES, University of Warwick, UK  
45

46 <sup>14</sup> School of Life & Health Sciences, Aston University, UK  
47

48 **Correspondence should be addressed to:**  
49

50 Junior Professor Dr Leen Vereenooghe, Department of Psychology, Faculty of Psychology and Sports  
51 Science, Bielefeld University, PO Box 10 01 31, D-33501 Bielefeld, Germany. Email address:  
52 leen.vereenoooghe@uni-bielefeld.de. Telephone: +49 (0)521-106 67521.  
53  
54  
55

56 **Word count:** 4483  
57  
58  
59  
60

## ABSTRACT

**Objective:** Mental health problems are more prevalent in people with than without intellectual disabilities, yet treatments options have received little attention. The aim of this study was to identify and evaluate the effectiveness of pharmacological and psychological interventions in the treatment of mental health problems in children and adults with severe and profound intellectual disabilities, given their difficulties in accessing standard mental health interventions, particularly talking-therapies, and difficulties reporting drug side-effects.

**Design:** A systematic review using electronic searches of PsycINFO, PsycTESTS, EMBASE, MEDLINE, CINAHL, ERIC, ASSIA, Science Citation Index, Social Science Citation Index, and CENTRAL was conducted to identify eligible intervention studies. Study selection, data extraction and quality appraisal were performed by two independent reviewers.

**Participants:** Study samples included at least 70 % children and/or adults with severe or profound intellectual disabilities or reported the outcomes of this subpopulation separate from participants with other levels of intellectual disabilities.

**Interventions:** Eligible intervention studies evaluated a psychological or pharmacological intervention using a control condition.

**Outcomes:** Symptom severity, frequency or other quantitative dimension (e.g., impact), as assessed with standardised measures of mental health problems.

**Results:** We retrieved 41,232 records, reviewed 573 full-text articles and identified 5 studies eligible for inclusion: 3 studies evaluating pharmacological interventions, and 2 studies evaluating psychological interventions. Study designs ranged from double-blind placebo-controlled crossover trials to single-case experimental reversal designs. Quality appraisals of this very limited literature base revealed good experimental control, poor reporting standards, and a lack of follow-up data.

**Conclusions:** Mental ill-health requires vigorous treatment, yet the current evidence base is too limited to identify with precision effective treatments specifically for children or adults with severe and profound intellectual disabilities. Clinicians therefore must work on the basis of general population evidence, whilst researchers work to generate more precise evidence for people with severe and profound intellectual disabilities.

1  
2  
3  
4  
5  
6  
7  
8  
9  
10  
11  
12  
13  
14  
15  
16  
17  
18  
19  
20  
21  
22  
23  
24  
25  
26  
27  
28  
29  
30  
31  
32  
33  
34  
35  
36  
37  
38  
39  
40  
41  
42  
43  
44  
45  
46  
47  
48  
49  
50  
51  
52  
53  
54  
55  
56  
57  
58  
59  
60

**PROSPERO registration number** CRD 42015024469

**Keywords:** intellectual disability, mental health, systematic review, psychological therapies, pharmacotherapies

For peer review only

### Strengths and limitations of this study

- To our knowledge this is the first systematic review focused on interventions to improve the mental health of both children and adults with severe and profound intellectual disabilities.
- Review eligibility was not restricted to randomised controlled trials which limits the strength of the review's findings.
- Treatment of mental health problems in people with severe or profound intellectual disabilities can be complex in light of the particular cognitive and biophysiological profile of this population, yet the body of evidence we identified was very slim.

## INTRODUCTION

Intellectual disabilities affect approximately 1 percent of the population and are characterised by significantly impaired intellectual and adaptive skills with onset before adulthood. Their prevalence of mental health problems has been reported to be more than seven times higher than for the general population [1]. People with severe and profound intellectual disabilities, as indicated by an intelligence quotient of less than 40, have limitations in problem-solving skills, cognitive and communication skills which can affect their ability to cope with stressful life events. The life circumstances of people with an intellectual disability may increase their risk of developing mental health problems or experiencing mental distress. Factors that have been identified as protective in adults without intellectual disabilities, such as employment opportunities, meaningful day activities and socially supportive networks, may be less likely to be present for people with intellectual disabilities and with additional impact for those with severe and profound intellectual disabilities compared to those with mild or moderate intellectual disabilities [2–4]. Genetic factors may further increase the vulnerability of some people with intellectual disabilities for mental health problems, as evidenced by significant comorbidity rates of anxiety problems and psychosis in people with intellectual disabilities and certain genetic syndromes [5–9].

Mental health problems are as common in people with severe and profound intellectual disabilities as in people with mild or moderate intellectual disabilities, reported to have a point prevalence of 22.4% [10–14]. Their treatment of mental health problems requires particular attention for three main reasons. First, longitudinal research investigating the mental health of children and young people with intellectual disabilities over a 14 year period suggest recovery may be poorer for those with severe intellectual disabilities, and therefore standard treatments may be sub-optimal [10–12]. Second, given their limitations in communication skills and understanding, people with severe and profound intellectual disabilities cannot be assumed to find talking therapies such as CBT-based interventions as accessible as other people do; yet these therapies are considered first line treatments of choice for many types of mental health problems. Third, it is possible that people with intellectual disabilities are more sensitive to the side effects of pharmacotherapies, or have greater difficulties in reporting side-effects when these occur, so raising the potential of more serious consequences, and the

1  
2  
3 need for different dosing regimes compared with other people. The high prevalence and potentially  
4 persistent mental health problems experienced by people with severe and profound intellectual  
5 disabilities thus call for effective interventions to treat such problems and to promote well-being.  
6  
7

8  
9 Existing systematic reviews have evaluated either the psychological or pharmacological  
10 treatment of mental health problems in people with intellectual disabilities. Cognitive behavioural  
11 therapies (CBT) were found to have moderate positive treatment effects for people with intellectual  
12 disabilities who experience anger problems, anxiety and depression [15–17], but these findings are  
13 limited to adults with mild to moderate intellectual disabilities, however, as children or individuals  
14 with severe and profound intellectual disabilities were not represented in the primary studies. Reviews  
15 of pharmacological interventions have largely focused on behaviour problems independent of their  
16 association with mental health problems. For example, potentially effective interventions for  
17 behaviour problems in adults with intellectual disabilities include risperidone, lithium and anti-  
18 epileptic mood stabilisers [18,19]. However, the methodological quality of the evidence and  
19 registered adverse effects indicate that the use of these pharmacological agents requires caution  
20 [18,19]. Whilst behaviour problems can be associated with mental health problems and take on a  
21 precipitating or perpetuating role, they are more indicative of emotional dysregulation than of  
22 psychiatric symptomatology, and have been demonstrated in robust studies to be distinct from other  
23 types of mental health problems [20]. We have not identified reviews on treatment response and side-  
24 effects to pharmacotherapies for other types of mental health problems experienced by people with  
25 severe and profound intellectual disabilities. The objective of the present systematic review was to  
26 evaluate the effectiveness of psychological and pharmacological treatments for mental health  
27 problems and their key symptoms in both children and adults with severe or profound intellectual  
28 disabilities.  
29  
30  
31  
32  
33  
34  
35  
36  
37  
38  
39  
40  
41  
42  
43  
44  
45  
46  
47

## 48 **METHODS**

49  
50 The review was conducted and written in accordance with the Preferred Reporting Items for  
51 Systematic Reviews and Meta-Analyses statement [21]. The review protocol was registered with  
52 PROSPERO, Centre for Reviews and Dissemination, under the reference number CRD 42015024469.  
53  
54  
55  
56  
57  
58  
59  
60



### Search strategy

The search strategy was developed for two conjoint systematic reviews focused on the evaluation of measures of mental health problems and interventions respectively in people with severe and profound intellectual disabilities. Although separate search terms were used for each systematic review, records identified through the respective searches were pooled together prior to the study eligibility screening to ensure that studies piloting an assessment as an intervention outcome measure would also be identified.

Initial systematic searches were conducted in the week of 13 to 17 July 2015 for the following databases: PsycINFO, PsycTESTS, EMBASE, MEDLINE, CINAHL, ERIC, ASSIA, Science Citation Index, Social Science Citation Index, Cochrane Central Register of Controlled Trials (CENTRAL). Searches used Boolean terms to combine search strings for intellectual disabilities, mental health, and psychological or pharmacological interventions, as shown in Table 1 for the PsycINFO, PsycTESTS and ASSIA searches. Full search strategies for each database can be requested from the authors.

Searches were updated in September 2017, to cover the time period from the original searches, and no new studies were identified from these searches. The updated searches followed the same search strategy and study screening protocol as the original searches.

**Table 1**

Search strategy for simultaneous database searches of PsycINFO, PsycTESTS and ASSIA using ProQuest database host.

| Search terms                                                                                                                                                                             | Results |
|------------------------------------------------------------------------------------------------------------------------------------------------------------------------------------------|---------|
| <i>Intellectual disabilities</i>                                                                                                                                                         |         |
| 1 SU.EXACT.EXPLODE("Intellectual Development Disorder")                                                                                                                                  | 37548   |
| 2 TI(mental* NEAR/3 (disab* OR impair* OR handicap* OR subnormal* OR deficien* OR retard*)) OR AB(mental* NEAR/3 (disab* OR impair* OR handicap* OR subnormal* OR deficien* OR retard*)) | 38279   |

|    |                                                                                                                                                                                                                                                                                                                                                                                                                                                                      |        |
|----|----------------------------------------------------------------------------------------------------------------------------------------------------------------------------------------------------------------------------------------------------------------------------------------------------------------------------------------------------------------------------------------------------------------------------------------------------------------------|--------|
| 3  | TI(learning NEAR/3 (disab* OR impair* OR difficult* OR disorder)) OR<br>AB(learning NEAR/3 (disab* OR impair* OR difficult* OR disorder))                                                                                                                                                                                                                                                                                                                            | 36985  |
| 4  | TI(moron OR imbecile OR feeble-minded OR subnormal OR retard) OR<br>AB(moron OR imbecile OR feeble-minded OR subnormal OR retard)                                                                                                                                                                                                                                                                                                                                    | 4289   |
| 5  | TI(intellect* NEAR/3 (disab* OR impair* OR handicap* OR disorder* OR<br>subnormal* OR deficien*)) OR AB(intellect* NEAR/3 (disab* OR impair* OR<br>handicap* OR disorder* OR subnormal* OR deficien*))                                                                                                                                                                                                                                                               | 16059  |
| 6  | TI((Down* OR "Smith-Magenis" OR Rett* OR "Lesch-Nyhan" OR "Prader-<br>Willi" OR Angelman OR "fragile X" OR "Cri-du-chat" OR "Cornelia de Lange"<br>OR "de Lange" OR "Rubinstein-Taybi" OR velocardiofacial) NEAR/3<br>syndrome*) OR AB((Down* OR "Smith-Magenis" OR Rett* OR "Lesch-<br>Nyhan" OR "Prader-Willi" OR Angelman OR "fragile X" OR "Cri-du-chat" OR<br>"Cornelia de Lange" OR "de Lange" OR "Rubinstein-Taybi" OR<br>velocardiofacial) NEAR/3 syndrome*) | 11067  |
| 7  | OR/ 1-6                                                                                                                                                                                                                                                                                                                                                                                                                                                              | 105392 |
|    | <i>Mental health</i>                                                                                                                                                                                                                                                                                                                                                                                                                                                 |        |
| 8  | SU.EXACT.EXPLODE("Depression (Emotion)")                                                                                                                                                                                                                                                                                                                                                                                                                             | 22448  |
| 9  | SU.EXACT.EXPLODE("Anxiety Disorders") OR<br>SU.EXACT.EXPLODE("Generalized Anxiety Disorder") OR<br>SU.EXACT.EXPLODE("Anxiety") OR SU.EXACT.EXPLODE("Social<br>Anxiety")                                                                                                                                                                                                                                                                                              | 124637 |
| 10 | TI(anger NEAR/3 (problem* OR disorder*)) OR AB(anger NEAR/3 (problem*<br>OR disorder*))                                                                                                                                                                                                                                                                                                                                                                              | 1212   |

|    |    |        |
|----|----|--------|
| 1  |    |        |
| 2  |    |        |
| 3  | 11 | 272855 |
| 4  |    |        |
| 5  |    |        |
| 6  |    |        |
| 7  |    |        |
| 8  |    |        |
| 9  |    |        |
| 10 |    |        |
| 11 | 12 | 226542 |
| 12 |    |        |
| 13 |    |        |
| 14 |    |        |
| 15 |    |        |
| 16 |    |        |
| 17 |    |        |
| 18 | 13 | 273779 |
| 19 |    |        |
| 20 |    |        |
| 21 |    |        |
| 22 |    |        |
| 23 |    |        |
| 24 |    |        |
| 25 |    |        |
| 26 |    |        |
| 27 |    |        |
| 28 |    |        |
| 29 |    |        |
| 30 |    |        |
| 31 | 14 | 655607 |
| 32 |    |        |
| 33 |    |        |
| 34 |    |        |
| 35 | 15 | 23372  |
| 36 |    |        |
| 37 | 16 | 207285 |
| 38 |    |        |
| 39 | 17 | 193401 |
| 40 |    |        |
| 41 |    |        |
| 42 |    |        |
| 43 |    |        |
| 44 | 18 | 19555  |
| 45 |    |        |
| 46 | 19 | 358684 |
| 47 |    |        |
| 48 |    |        |
| 49 |    |        |
| 50 | 20 | 196693 |
| 51 |    |        |
| 52 |    |        |
| 53 |    |        |
| 54 |    |        |

*Mental well-being*

*Psychological interventions*

|                                      |                                                                                                                                                                                                                                                        |        |
|--------------------------------------|--------------------------------------------------------------------------------------------------------------------------------------------------------------------------------------------------------------------------------------------------------|--------|
| 21                                   | TI(psychoanaly* OR psychodynamic*) OR AB(psychoanaly* OR psychodynamic*)                                                                                                                                                                               | 90160  |
| 22                                   | TI((behavior* OR behaviour* OR cognitive) N/2 therap*) OR AB((behavior* OR behaviour* OR cognitive) N/2 therap*)                                                                                                                                       | 39534  |
| 23                                   | TI((family OR interpersonal OR systemic OR “client centered” OR “client centred” OR narrative OR relational) N/2 therap*) OR AB((family OR interpersonal OR systemic OR “client centered” OR “client centred” OR narrative OR relational) N/2 therap*) | 25851  |
| 24                                   | TI((supportive OR talking OR solution*focused OR emotion*focused OR non-pharmacological) N/2 therap*) OR AB((supportive OR talking OR solution*focused OR emotion*focused OR non-pharmacological) N/2 therap*)                                         | 1984   |
| 25                                   | TI(dialectical behavio*r therap* OR mindfulness* OR “acceptance and commitment” OR “rational emotive”) OR AB(dialectical behavio*r therap* OR mindfulness* OR “acceptance and commitment” OR “rational emotive”)                                       | 10630  |
| 26                                   | TI((group OR individual) N/2 therap*) OR AB((group OR individual) N/2 therap*)                                                                                                                                                                         | 25884  |
| 27                                   | TI(anger N/2 (manag* OR train*)) OR AB(anger N/2 (manag* OR train*))                                                                                                                                                                                   | 1612   |
| 28                                   | TI((play OR art OR relax* OR music OR dance OR creative OR drama OR activity) N/2 therap*) OR AB((play OR art OR relax* OR music OR dance OR creative OR drama OR activity) N/2 therap*)                                                               | 17343  |
| 29                                   | OR/ 20-28                                                                                                                                                                                                                                              | 342375 |
| <i>Pharmacological interventions</i> |                                                                                                                                                                                                                                                        |        |
| 30                                   | TI(pharmacotherapy* OR pharmacolog* OR pharmacological therap*) OR AB(pharmacotherapy* OR pharmacolog* OR pharmacological therap*)                                                                                                                     | 49958  |

|    |    |                                                                                     |
|----|----|-------------------------------------------------------------------------------------|
| 1  |    |                                                                                     |
| 2  |    |                                                                                     |
| 3  | 31 | TI(antipsychotic* OR anti-psychotic* OR psychotrop* OR psychopharmac*) 41884        |
| 4  |    |                                                                                     |
| 5  |    | OR AB(antipsychotic* OR anti-psychotic* OR psychotrop* OR                           |
| 6  |    | psychopharmac*)                                                                     |
| 7  |    |                                                                                     |
| 8  |    |                                                                                     |
| 9  | 32 | TI(atypical N/2 (antipsychotic* OR anti-psychotic* OR psychotrop*)) OR 6622         |
| 10 |    |                                                                                     |
| 11 |    | AB(atypical N/2 (antipsychotic* OR anti-psychotic* OR psychotrop*))                 |
| 12 |    |                                                                                     |
| 13 | 33 | TI(tricyclic antidepressant OR anti-depress* OR antidepress*) OR AB(tricyclic 34457 |
| 14 |    |                                                                                     |
| 15 |    | antidepressant OR anti-depress* OR antidepress*)                                    |
| 16 |    |                                                                                     |
| 17 |    |                                                                                     |
| 18 | 34 | TI(adrenergic blocking drugs OR monoamine oxidase inhibitors) OR 1905               |
| 19 |    |                                                                                     |
| 20 |    | AB(adrenergic blocking drugs OR monoamine oxidase inhibitors)                       |
| 21 |    |                                                                                     |
| 22 | 35 | TI(anxiolytic* OR antipanic* OR antianxiety ) OR AB(anxiolytic* OR 7153             |
| 23 |    |                                                                                     |
| 24 |    | antipanic* OR antianxiety )                                                         |
| 25 |    |                                                                                     |
| 26 | 36 | TI(anticonvulsant*) OR AB(anticonvulsant*) 4142                                     |
| 27 |    |                                                                                     |
| 28 |    |                                                                                     |
| 29 | 37 | TI(lithium*OR lithium carbonate OR SSRI* OR “selective serotonin reuptake 12261     |
| 30 |    |                                                                                     |
| 31 |    | inhibitor” OR serotonin reuptake inhibitor OR serotonin antagonist) OR              |
| 32 |    |                                                                                     |
| 33 |    | AB(lithium*OR lithium carbonate OR SSRI* OR “selective serotonin reuptake           |
| 34 |    |                                                                                     |
| 35 |    | inhibitor” OR serotonin reuptake inhibitor OR serotonin antagonist)                 |
| 36 |    |                                                                                     |
| 37 |    |                                                                                     |
| 38 |    |                                                                                     |
| 39 |    |                                                                                     |
| 40 |    |                                                                                     |
| 41 |    |                                                                                     |
| 42 |    |                                                                                     |
| 43 |    |                                                                                     |
| 44 |    |                                                                                     |
| 45 |    |                                                                                     |
| 46 |    |                                                                                     |
| 47 |    |                                                                                     |
| 48 |    |                                                                                     |
| 49 |    |                                                                                     |
| 50 |    |                                                                                     |
| 51 |    |                                                                                     |
| 52 |    |                                                                                     |
| 53 |    |                                                                                     |
| 54 |    |                                                                                     |
| 55 |    |                                                                                     |
| 56 |    |                                                                                     |
| 57 |    |                                                                                     |
| 58 |    |                                                                                     |
| 59 |    |                                                                                     |
| 60 |    |                                                                                     |

|    |                                                                           |        |
|----|---------------------------------------------------------------------------|--------|
| 1  |                                                                           |        |
| 2  |                                                                           |        |
| 3  | 38                                                                        | 61771  |
| 4  | TI(risperidone OR olanzapine OR clozapine* OR Leponex OR Denzapine OR     |        |
| 5  | Zaponex OR citalopram OR escitalopram OR fluoxetine OR fluvoxamine OR     |        |
| 6  | paroxetine OR sertraline OR trazodone OR clomipramine OR amoxapine OR     |        |
| 7  | isocarboxazid OR phenelzine OR tranylcypromine OR moclobemide OR          |        |
| 8  | amoxapine OR bupropion OR sulphiride OR maprotiline OR imipramine OR      |        |
| 9  | clomipramine OR desipramine OR opipramol OR doxepin OR amitriptyline OR   |        |
| 10 | lofepramine OR nortriptyline OR benzodiazepine* OR alprazolam OR          |        |
| 11 | clonazepam OR diazepam OR temazepam OR melatonin OR methylphenidate       |        |
| 12 | OR sodium valproate OR carbamazepine OR lamotrigine) OR AB(risperidone    |        |
| 13 | OR olanzapine OR clozapine* OR Leponex OR Denzapine OR Zaponex OR         |        |
| 14 | citalopram OR escitalopram OR fluoxetine OR fluvoxamine OR paroxetine OR  |        |
| 15 | sertraline OR trazodone OR clomipramine OR amoxapine OR isocarboxazid OR  |        |
| 16 | phenelzine OR tranylcypromine OR moclobemide OR amoxapine OR bupropion    |        |
| 17 | OR sulphiride OR maprotiline OR imipramine OR clomipramine OR desipramine |        |
| 18 | OR opipramol OR doxepin OR amitriptyline OR lofepramine OR nortriptyline  |        |
| 19 | OR benzodiazepine* OR alprazolam OR clonazepam OR diazepam OR             |        |
| 20 | temazepam OR melatonin OR methylphenidate OR sodium valproate OR          |        |
| 21 | carbamazepine OR lamotrigine)                                             |        |
| 22 | 39                                                                        | 153952 |
| 23 | OR/ 30-38                                                                 |        |
| 24 | <i>Final search string</i>                                                |        |
| 25 | 40                                                                        | 2607   |
| 26 | 7 AND (14 OR 19) AND (29 OR 39)                                           |        |

### Study eligibility criteria

The following inclusion criteria were applied to (1) publication type, (2) study design, (3) participants, (4) interventions, and (5) outcomes.

(1) *Publication.* Peer-reviewed publications written in English, French, German or Dutch were eligible for review.

(2) *Study design.* The following study designs were eligible for inclusion in the review: (a) randomised controlled trials, (b) controlled trials without randomisation, (c) single group pre-post designs, (d) case series with outcome measures reported as group mean data, (e) single-case experimental designs, and (f) case-control studies. Case studies without a control condition or a return to baseline were excluded.

(3) *Participants.* To ensure that the outcome data were representative for people with severe and profound intellectual disabilities it was required that either a minimum of 70% of participants were diagnosed or reported as having severe or profound intellectual disabilities, or that data for participants with severe or profound intellectual disabilities were reported separately in the study. Although this was an arbitrary criterion, this was to ensure that a majority of people with severe or profound intellectual disabilities were in the study samples. Studies that did not provide any usable information about the level of intellectual disabilities within samples were excluded. No exclusions were applied concerning participants' age or gender or any other characteristics except for degree of intellectual disability.

(4) *Intervention.* Eligible psychological interventions were delivered by a trained lay therapist or qualified professional who systematically applied interventions based on well-established psychological principles and techniques directly to the person with an intellectual disabilities, either individually or in a group. For pharmacological interventions, it was expected that the pharmaceutical agent was given with regular review by a qualified medical practitioner or health professional, and recognised at least in principle as a potential treatment for a mental health problem/symptom.

(5) *Outcomes.* Interventions had to target mental disorders or their key symptoms as assessed by a qualified clinician using standardised assessments and which have a significant impact on daily

1  
2  
3 functioning. However, we acknowledge that defining the mental and physical components of mental  
4 and physical disorders into mutually exclusive categories can be challenging, not in the least because  
5 certain components are symptomatic of multiple disorders and certain disorders have shown high rates  
6 of co-morbidity with one another. For the purpose of this systematic review, the inclusion criteria for  
7 mental disorders and their symptoms were derived from the DSM-IV [22], as this version was most  
8 likely to be used by the primary studies to be identified by the systematic review. Mental and  
9 behavioural disorders, and their key symptoms, eligible for review fell within the following  
10 classifications: (a) attention-deficit and disruptive behaviour disorders, (b) tic disorders, (c) other  
11 disorders of infancy, childhood, or adolescence, (d) schizophrenia and other psychotic disorders, (e)  
12 mood disorders, (f) anxiety disorders, (g) somatoform disorders, (h) factitious disorders, (i)  
13 dissociative disorders, (j) eating disorders, (k) adjustment disorders, and (l) personality disorders.  
14 Studies focused on key symptoms of mental disorders were included as not all treatment offers a  
15 holistic approach, and interventions may instead aim to alleviate one or more symptoms of a disorder.  
16 By contrast, challenging behaviours and behaviour problems may be associated with or indicative of  
17 underlying mental disorders [20,23] but are not recognised as a key diagnostic feature of the above  
18 listed mental disorders and are hence excluded from this review.

19  
20  
21  
22  
23  
24  
25  
26  
27  
28  
29  
30  
31  
32  
33  
34  
35  
36  
37  
38  
39  
40  
41  
42  
43  
44  
45  
46  
47  
48  
49  
50  
51  
52  
53  
54  
55  
56  
57  
58  
59  
60  
The broad scope of the systematic review in terms of study designs, type of interventions and  
range of participants was advised as initial scoping searches indicated that only few studies included  
individuals with severe and profound intellectual disabilities.

A single post-hoc exclusion criterion was applied to exclude records from the searches  
published prior to 1980 (n=106 records, but not fully checked for inclusion criteria), coinciding with  
the publication of the third edition of the Diagnostic and Statistical Manual of Mental Disorders  
(DSM-III); [24]. This assured a minimal level of consistency in the recognition and diagnosis of  
mental health problems from DSM-III through to DSM-IV. It is likely that there would have been a  
delay between the publication of the DSM-III and its first use in published research, but searches back  
to 1980 were essential to ensure that no potentially relevant studies were missed.



### Study selection

Data collection and abstract screening were performed by the first author (LV). Twenty percent of records were also screened by the second author (SF), leading to an overall agreement rate of 99.8 % and a Kappa coefficient of 0.91 for studies to proceed to full text evaluation. Second screening a proportion of results is an accepted practice when a review is large and resources are limited [25]. The overall inclusion rate for the screening of titles and abstracts was 2.3 %. Full-text review of 573 articles was performed independently by the two reviewers (LV and SF), which resulted in a Kappa coefficient of 0.76 for inclusion in the review and the data extraction stage. Eleven disagreements between the two reviewers were resolved through joint discussion. All disagreements concerned the proportion of participants with severe and profound intellectual disabilities and were not related to study design, intervention or outcomes. The review of one full text article required consultation with the third author (RH) to determine whether this study met the review eligibility criteria regarding mental health outcomes. Upon discussion, the paper was excluded from the review.

Next, reference lists and citation records of all included studies were screened to identify additional papers that may not have fulfilled the search term criteria. No additional studies were identified in this way.

### Data extraction and quality synthesis

Data extraction was conducted by the second author and reviewed by the first author for variables including: study design, study population, intervention, outcome measures, and follow-up data.

The certainty in the evidence for each outcome measure could not be assessed with the GRADE approach [26–28], as used by the Cochrane collaboration and national guideline organisations such as NICE in the UK, due to the incomparability of identified studies in terms of study design, interventions, and outcomes. Likewise, it was not possible to conduct a meta-analysis or provide other summary measures because no two studies addressed the same mental health problem using a similar intervention.

Both reviewers independently performed a quality appraisal of all included studies. No disagreements were recorded at either stage. Quality assessment followed the Critical Appraisal Skills

1  
2  
3 Programme [29,30] checklists or the quality indicators for within single-subjects research [31],  
4  
5 dependent on the study design.

## 6 7 **RESULTS**

8  
9 The search strategy for the conjoint systematic review identified 24,883 unique records, of  
10  
11 which 573 were retained for full-text eligibility screening. The study selection process is illustrated in  
12  
13 Figure 1. Excluded articles most commonly did not meet the eligibility criteria concerning the severity  
14  
15 of intellectual disabilities of study participants (n = 242). Initial records were also excluded based on  
16  
17 their study design (n = 113), a publication date prior to 1980 (n = 106), because the intervention or  
18  
19 outcomes were not focused on recognised mental health problems (n = 59), due to their publication  
20  
21 status (e.g. conference abstracts; n = 38), or because the full-text paper could either not be retrieved (n  
22  
23 = 6) or was published in a non-eligible language (n = 4). In total, five studies were included in the  
24  
25 review and are described in Table 2. Three studies included only adults with intellectual disabilities: a  
26  
27 double-blind placebo-controlled crossover trial [32] and a single-case experimental reversal design of  
28  
29 pharmacotherapy [33], as well as a single-case experimental reversal design of a psychological  
30  
31 intervention [34]. Two studies included children and young people: a randomised trial of  
32  
33 pharmacotherapy by White and Aman [35] and a single-case study of a psychological intervention for  
34  
35 a 13-year old girl [36].

36  
37  
38 [Figure 1 about here]  
39  
40  
41  
42  
43  
44  
45  
46  
47  
48  
49  
50  
51  
52  
53  
54  
55  
56  
57  
58  
59  
60

**Table 2**

Characteristics of pharmacological and psychological interventions studies.

| First author (Year)                        | Study Design <sup>a</sup>                                                                                                                                                 | Participants                                                                                                                                                                  | Intervention                                                                                                                        | Outcomes                                                                                                                                                                                                                                                                                                                            | Follow-up                                                                                                                  |
|--------------------------------------------|---------------------------------------------------------------------------------------------------------------------------------------------------------------------------|-------------------------------------------------------------------------------------------------------------------------------------------------------------------------------|-------------------------------------------------------------------------------------------------------------------------------------|-------------------------------------------------------------------------------------------------------------------------------------------------------------------------------------------------------------------------------------------------------------------------------------------------------------------------------------|----------------------------------------------------------------------------------------------------------------------------|
| <i>Psychopharmacological interventions</i> |                                                                                                                                                                           |                                                                                                                                                                               |                                                                                                                                     |                                                                                                                                                                                                                                                                                                                                     |                                                                                                                            |
| Aman (1986)                                | Double-blind placebo-controlled crossover trial<br><br>Within-group randomisation<br><br>I1: Imipramine<br>I2: placebo<br><br>1-week washout period between interventions | Adults with depressive and affective symptoms<br><br>N = 5 (2M/3F)<br>Age range: 18 – 23 years<br>intellectual disabilities<br>severity: Slosson IQ <sup>b</sup> range 10 -14 | Imipramine (Dumex) or placebo<br><br>Duration: 4W<br><br>Dose: 3 mg/kg/day<br><br>Setting: residential ward                         | Imipramine caused symptom deterioration for ABC <sup>c</sup> scores related to irritability, lethargy, and hyperactivity.<br><br>No intervention effects were observed for: stereotypy and inappropriate speech.<br><br>Statistical data only provided for analyses including a second intervention group, non-eligible for review. | No follow-up                                                                                                               |
| Rosenquist (1997)                          | Single-case experimental reversal design (ABABA)<br><br>A, Baseline<br>B, Haloperidol<br><br>Single blind, masked                                                         | Adult with Gilles de la Tourette syndrome<br><br>N = 1, Female<br>Age = 35 years<br>Severe intellectual disabilities                                                          | Haloperidol<br><br>Duration: 22W,<br>A: 2W baseline<br>B: 8W intervention<br>A: 2W baseline<br>B: 8W intervention<br>A: 2W baseline | Weekly observations using Behavioral Observation and Tic Checklist <sup>d</sup> of 3 videotaped conditions: (1) table setting task, (2) mealtime, and (3) waiting.<br>Pre-post % time (SD)                                                                                                                                          | W6 of increased dosage<br><br>% time (SD) engaged in tic behavior at W6 (dose 10 mg/day):<br><br>Mealtime: SM-tic: 6.3 (6) |

|              |                                                 |                                                                         |                                                                                                 |                                                                                                                                          |                                                                                              |
|--------------|-------------------------------------------------|-------------------------------------------------------------------------|-------------------------------------------------------------------------------------------------|------------------------------------------------------------------------------------------------------------------------------------------|----------------------------------------------------------------------------------------------|
|              | assessment                                      |                                                                         | Dose:<br>-W1: 1 mg/day<br>-W2: 2mg/day<br>-W3-4: 5 mg/day<br>-W5-6: 10 mg/day<br>-W7-8: washout | engaged in tic behavior at baseline and W1 (dose 1mg/day):                                                                               | CM-tic: 3.0 (3)<br>SV-tic: 1.0 (3)<br>CV-tic: 1.0 (2)                                        |
|              |                                                 |                                                                         | Setting: community group home                                                                   | Mealtime:<br>SM-tic: 34.8 (20); 11.0 (12)<br>CM-tic: 13.6 (10); 5.3 (8)<br>SV-tic: 35.4 (28); 2.0 (4)<br>CV-tic: 1.3 (3); 0.0 (0)        | Waiting:<br>SM-tic: 24.7 (20)<br>CM-tic: 41.5 (18)<br>SV-tic: 48.4 (26)<br>CV-tic: 34.8 (20) |
|              |                                                 |                                                                         |                                                                                                 |                                                                                                                                          | Dose-specific improvements (10mg/day), reversible                                            |
|              |                                                 |                                                                         |                                                                                                 | Waiting:<br>SM-tic: 46.8 (31); 20.8 (26)<br>CM-tic: 41.2 (19); 25.3 (21)<br>SV-tic: 65.3 (29); 69.6 (25)<br>CV-tic: 42.5 (18); 23.0 (18) |                                                                                              |
| White (1985) | Double-blind placebo-controlled crossover trial | Inpatients with serious behaviour disturbances, including hyperactivity | Pimozide or placebo                                                                             | ANCOVA for drug effects and baseline as covariate on ABC subscales                                                                       | No follow-up                                                                                 |
|              | I1: Pimozide<br>I2: Placebo                     | N = 8, 7M/1F<br>Mean age 15.7 years (SD = 3.42)                         | Baseline: 4W<br>Intervention: 4W + 4W                                                           |                                                                                                                                          |                                                                                              |
|              | Randomisation within participants               | intellectual disabilities severity: moderate to profound; mean IQ =     | Dose:<br>I1: 6 mg/day<br>Setting: no info                                                       | Pimozide has an effect:<br>Irritability: F = 11.78<br>Hyperactivity: F = 7.69                                                            |                                                                                              |
|              |                                                 |                                                                         |                                                                                                 | No significant effects                                                                                                                   |                                                                                              |

1  
2  
3  
4  
5  
6  
7  
8  
9  
10  
11  
12  
13  
14  
15  
16  
17  
18  
19  
20  
21  
22  
23  
24  
25  
26  
27  
28  
29  
30  
31  
32  
33  
34  
35  
36  
37  
38  
39  
40  
41  
42  
43  
44  
45  
46  
47

|                                    |                                                                                                                                                                   |                                                                                                                                                            |                                                                                                                                                                                                                                                                |                                                                                                                                                                                                                                                                                                                       |                                                                                      |              |
|------------------------------------|-------------------------------------------------------------------------------------------------------------------------------------------------------------------|------------------------------------------------------------------------------------------------------------------------------------------------------------|----------------------------------------------------------------------------------------------------------------------------------------------------------------------------------------------------------------------------------------------------------------|-----------------------------------------------------------------------------------------------------------------------------------------------------------------------------------------------------------------------------------------------------------------------------------------------------------------------|--------------------------------------------------------------------------------------|--------------|
|                                    | 1-week washout period between interventions                                                                                                                       | 20.4 (SD = 12.11)                                                                                                                                          |                                                                                                                                                                                                                                                                |                                                                                                                                                                                                                                                                                                                       | for:<br>Lethargy: F = 0.84<br>Stereotypy: F = 3.48<br>Inappropriate speech: F = 1.31 |              |
| <i>Psychological interventions</i> |                                                                                                                                                                   |                                                                                                                                                            |                                                                                                                                                                                                                                                                |                                                                                                                                                                                                                                                                                                                       |                                                                                      |              |
| Lindauer (1999)                    | Single-case experimental reversal design (ABAB)<br><br>A, Baseline: empty room & quiet hands procedure<br>B, Enriched Environment & quiet hands                   | Mood disorder, major depression<br><br>N = 1, Female<br>Age = 23 years<br>Severe intellectual disabilities                                                 | Enriched environment: 12 items selected for inclusion by paired-choice assessment<br><br>Duration: 57 sessions;<br>A: 11 sessions<br>B: 5 sessions<br>A: 29 sessions<br>B: 12 sessions<br><br>Dose: 10 minute sessions<br><br>Setting: Laboratory, padded room | Percentage of 10-s intervals of signs of negative and positive affect<br><br>Pre: relatively high levels of negative affect (M = 27.4%) and low levels of positive affect (M = 2.3%)<br><br>Post: negative affect decreased (M = 0.1%) and positive affect increased, especially during B2 (M = 11.5% across phases). |                                                                                      | No follow-up |
| Zarkowska (1989)                   | 2 Single-case experimental reversal designs (ABA)<br><br>I1: Relaxation:<br>A, Baseline: school activity, tics ignored<br>B, relaxation<br>A, Baseline: return to | Gilles de la Tourette syndrome<br><br>N = 1, Female<br>Age = 13 years<br>Severe intellectual disabilities (Griffiths Mental Development Scale score ranged | I1: verbal instructions for relaxation exercises and praise when calm<br>Duration: 10 minutes<br><br>I2: verbal interruption following the occurrence of a verbal tic                                                                                          | I1 reduced tic frequency during relaxation but return to baseline after intervention<br><br>I2 increased vocal tic frequency.                                                                                                                                                                                         |                                                                                      | No follow-up |

|    |                        |                       |                      |                       |
|----|------------------------|-----------------------|----------------------|-----------------------|
| 1  |                        |                       |                      |                       |
| 2  |                        |                       |                      |                       |
| 3  |                        |                       |                      |                       |
| 4  |                        |                       |                      |                       |
| 5  | school activity, tics  | from 17 to 42 months) | Duration: 10 minutes | After I1 and I2: No   |
| 6  | ignored                |                       |                      | generalised reduction |
| 7  |                        |                       |                      | in tic frequency      |
| 8  | I2: interruption       |                       |                      |                       |
| 9  | A, Baseline: school    |                       |                      |                       |
| 10 | activity, tics ignored |                       |                      |                       |
| 11 | B, interruption        |                       |                      |                       |
| 12 | A, Baseline: return to |                       |                      |                       |
| 13 | school activity, tics  |                       |                      |                       |
| 14 | ignored                |                       |                      |                       |
| 15 |                        |                       |                      |                       |

16 *Note.* I1, intervention 1; I2, intervention 2; G1, group 1; G2, group 2; Gender ratio expressed as Male/Female; W1, week 1; SD, standard deviation. Outcomes  
 17 reported for primary outcome measure only, unless where mental health or mental well-being outcome measure were recorded as secondary outcome measures.

18  
 19 <sup>a</sup> AB designs with A: baseline and B: treatment.

20  
 21 <sup>b</sup> Slosson IQ scores correlate highly with Stanford Binet Intelligence Test scores and correlate with the Cattell Infant Intelligence Scale when used with children  
 22 under the age of 2 (Slosson, 1975).

23  
 24 <sup>c</sup> ABC, Aberrant Behavior Checklist.

25  
 26 <sup>d</sup> SM-tic, simple motor tic; CM-tic, complex motor tic; SV-tic, simple vocal tic; CV-tic, complex vocal tic.

### Psychological interventions

Two studies evaluated interventions based on psychological principles. Interventions were offered for symptoms of depressive disorder and to manage tic frequency in Gilles de la Tourette syndrome.

In a single-case experimental ABAB design, Lindauer and colleagues [34] offered an enriched environment for the management of major depressive disorder in a 23-year old woman with severe intellectual disabilities who also presented with self-injurious behaviour. Pre-existing treatment of the mood disorder with carbamazepine (5.3 mg/kg/day) was continued during the study. The enriched environment setting was a 3 metre by 3 metre padded room, in an inpatient unit, in which stimuli were present that were chosen following a paired-choice assessment to identify the woman's preferred stimuli and assess signs of positive and negative affect. Smiling, giggling and laughing were considered examples of positive 'affect', whereas frowning, whining, crying and verbal expressions such as "I am sad" were identified as signs of negative 'affect'. No other outcome measures relating to the mood disorder were employed. Behavioural observations, through a one-way mirror, showed that the enriched environment increased signs of positive affect and decreased signs of negative affect, in particular during the second intervention phase. The lack of follow-up measures and the delivery of interventions in a padded room in an inpatient setting reduce the ecological validity of this intervention. Likewise, the replicability of findings is impeded in terms of participant selection and intervention fidelity (see Table 3).

Zarkowska et al. [36] adopted a basic single-case experimental design to examine interventions for vocal and motor tics in a 13-year old girl with Gilles de la Tourette syndrome and severe intellectual disabilities. Two treatment probes, cued relaxation and interruption, were evaluated using an ABA return to baseline design for each intervention comprised of a five minute baseline recording, a five minute intervention, and a five minute post-baseline recording. Cued relaxation appeared to lead to better outcomes but neither intervention had lasting effects and interruption increased vocal tic frequency. The study design showed strong external and social validity and provided clear descriptions of dependent and independent variables (see Table 3). However, internal

validity was weak and the ABA design was not the most suitable for demonstrating experimental control. Following the evaluation of treatment probes, the study continued as an A-B case study implementing successive interventions of relaxation training, treatment with clonidine and treatment with pimozide. Due to the non-controlled nature of these interventions, their respective outcome data and follow-up data were not considered eligible for inclusion in this review.

The replicability of findings from both studies is hindered by a lack of information regarding participant selection, physical setting of the intervention, implementation fidelity, and the reliability of outcome measurements.

**Table 3**

Quality appraisal of single-subject studies using the Quality Indicators Within Single-Subject Research [31].

| Quality indicator                                          | Lindauer et al. (1999) | Rosenquist et al. (1997) | Zarkowska (1989) |
|------------------------------------------------------------|------------------------|--------------------------|------------------|
| <i>Participant description and setting</i>                 |                        |                          |                  |
| Ability to select individuals with similar characteristics | yes                    | yes                      | yes              |
| Replicability of participant selection process             | no                     | no                       | no               |
| Replicability of physical setting                          | yes                    | yes                      | partial          |
| <i>Dependent variable</i>                                  |                        |                          |                  |
| Described with operational precision                       | yes                    | yes                      | yes              |
| Measured to generate a quantifiable index                  | yes                    | yes                      | yes              |
| Measure is valid and replicable                            | yes                    | yes                      | yes              |
| Measurements repeated over time                            | yes                    | yes                      | no               |
| Measures assessed in terms of reliability or inter-        | yes                    | yes                      | no               |



---

observer agreement

*Independent variable*

Described with replicable precision                      yes                      yes                      yes

Systematically manipulated and under control of                      yes                      yes                      yes

experimenter

Overt measure of implementation fidelity                      no                      not                      no  
applicable

*Baseline*

Repeated measurements baseline                      yes                      yes                      no

Described with replicable precision                      yes                      yes                      yes

*Experimental control / Internal validity*

Minimum of 3 demonstrations of experimental                      yes                      yes                      no  
effect at 3 points in time

Controlling for threats to internal validity                      unclear                      yes                      unclear

Document a pattern of experimental control                      yes                      yes                      yes

*External Validity*

Effects replicated across participants, settings, or                      yes                      yes                      no  
materials

*Social validity*

Dependent variable is socially important                      yes                      yes                      yes

---

|                                                                                                                             |     |     |     |
|-----------------------------------------------------------------------------------------------------------------------------|-----|-----|-----|
| Magnitude of change is socially important                                                                                   | yes | yes | yes |
| Implementation of independent variable is practical and cost-effective                                                      | yes | yes | yes |
| Implementation of independent variable over extended period of time, by typical intervention agents and in typical contexts | yes | yes | yes |

### Pharmacological interventions

Two double-blind placebo-controlled crossover trials and one single-case experimental reversal design evaluated pharmacological interventions for use in people with severe intellectual disabilities and mental health problems.

Aman and colleagues [32] employed within-group randomisation of order of administration of 4 week treatment with imipramine, in a dosage of 3 mg/kg/day, and 4 weeks with placebo, with one week drug-free in between. Interventions were offered to five adults with severe intellectual disabilities and depressive symptoms, in addition to a group of five adults with acting-out behaviours. The latter were not eligible for inclusion in this review as these behaviours were not considered a mental health problem. Eligible depressive symptoms were based on evidence from prior research studies and required behavioural observation instead of information obtained from diagnostic interviews. Symptoms included 'seclusion and social withdrawal, sleep loss, weight loss, tearfulness or the appearance of sad affect, and a pervasive lack of overt behavior' [31, p. 265]. Intervention effects were assessed with the Aberrant Behavior Checklist [37] and indicated imipramine to have a detrimental effect on symptoms related to irritability, lethargy, and hyperactivity, and no effect on stereotypical behaviours and inappropriate speech. Adverse effects were recorded but not described separately for the five adults with severe intellectual disabilities and depressive symptoms. For one person with affective symptoms, imipramine was found to improve behaviour and relieve chronic constipation.

White and Aman [35] evaluated the use of pimozide on maladaptive behaviours and hyperactivity, in young people and adults with moderate to profound intellectual disabilities.

Following a four-week baseline, the eight participants received two four-week treatments with either pimozide, in a dosage of 0.12 mg/kg/day, or placebo, with a one-week washout period between intervention phases. Treatment effects were evaluated using assessments with the ABC for the last three weeks of each intervention. Hyperactivity scores on the ABC reduced following the intervention, as did irritability levels, based on nurses' behaviour ratings of participants. No intervention effects were observed for ABC lethargy, stereotypy, and inappropriate speech domains. Furthermore, behavioural observations also did not identify any treatment effects.

The methodological quality of these two studies was confirmed using the CASP quality appraisal checklist (see Table 4). However, follow-up measures were notably absent and sample sizes too small to provide sufficient power for the conducted statistical analyses. Additionally, the period of treatment was of too short duration, as imipramine can take up to 6 weeks to be effective in the general population, so that intervention was of poor design.

**Table 4**

Critical Appraisal Skills Programme (CASP Checklists; CASP, 2014) for studies with N > 1.

| Quality indicator                                      | Aman et al. (1986) <sup>a</sup>                 | White et al. (1985)                             |
|--------------------------------------------------------|-------------------------------------------------|-------------------------------------------------|
|                                                        |                                                 | a                                               |
| <i>Validity of the results</i>                         |                                                 |                                                 |
| Study addresses a clearly focused issue                | yes                                             | yes                                             |
| Cohort recruited in an acceptable way                  | yes                                             | yes                                             |
| Exposure accurately measured to minimise bias          | yes                                             | yes                                             |
| Outcome accurately measured to minimise bias           | yes                                             | yes                                             |
| Identification of all important confounding factors    | yes                                             | yes                                             |
| Design and/or analysis account for confounding factors | No: length of intervention too short to observe | No: length of intervention too short to observe |

|                                           |                                                                                                                    |                                                                                                                      |
|-------------------------------------------|--------------------------------------------------------------------------------------------------------------------|----------------------------------------------------------------------------------------------------------------------|
|                                           | treatment effects.                                                                                                 | treatment effects.                                                                                                   |
| Complete enough follow-up of participants | no                                                                                                                 | no                                                                                                                   |
| Long enough follow-up of participants     | no                                                                                                                 | no                                                                                                                   |
| <i>Scope of the results</i>               |                                                                                                                    |                                                                                                                      |
| Description of study results              | yes                                                                                                                | yes                                                                                                                  |
| Precision of study results                | No exact p-values,<br>no effect sizes, no<br>differentiation<br>between<br>depressive-like and<br>acting-out group | No exact p-values,<br>no effect sizes                                                                                |
| Believability of study results            | yes                                                                                                                | yes                                                                                                                  |
| <i>Impact of the results</i>              |                                                                                                                    |                                                                                                                      |
| Results applicable to local population    | Yes                                                                                                                | Yes                                                                                                                  |
| Results in line with available evidence   | no                                                                                                                 | Yes                                                                                                                  |
| Implications for practice                 | Length of<br>intervention too<br>short to draw<br>conclusions<br>regarding<br>implications                         | The study is now<br>out-dated given<br>improved<br>knowledge on the<br>risks of the long-<br>term use of the<br>drug |

---

*Note.*<sup>a</sup> CASP Checklist for Randomised Controlled Trials.

1  
2  
3 The only fully experimental single subject experimental design study evaluated the effect of  
4 haloperidol on tic frequency in a 35-year old woman with Gilles de la Tourette syndrome and severe  
5 intellectual disabilities [33]. Using an ABABA design, the dose of haloperidol was gradually increased  
6 during the intervention phases and maximal effectiveness was reached with the highest dosage of 10  
7 mg/day. Weekly behavioural observation at the community residential setting where the participant  
8 lived showed reduced tic frequencies during mealtimes, nearing zero-levels, and during waiting times.  
9 Intervention effects reversed when the dose was lowered. These findings are considered reliable due to  
10 masked assessment and reversal design, alongside the replicability of measures and intervention, see  
11 Table 3.  
12  
13  
14  
15  
16  
17  
18  
19

### 20 **Overall quality appraisal of the evidence base**

21  
22 Methodological quality of the identified studies was poor, with concern in terms of small  
23 sample sizes, lack of masked assessment, and lack of follow-up measures. By contrast, reporting  
24 standards were generally high in terms of variable descriptions and the internal and external validity of  
25 the results. Implications of the quality appraisal are integrated in the study descriptions above, whereas  
26 a detailed overview of the quality review for each study is reported in Tables 3 and 4.  
27  
28  
29  
30  
31

## 32 **DISCUSSION**

33  
34 Despite their very high rates of mental health problems, there is a lack of research in  
35 interventions that explicitly target mental health problems in people with severe and profound  
36 intellectual disabilities. The scope of this review was wide. However, only five studies were eligible  
37 for inclusion and the findings are inconclusive at best. This is highly problematic for clinicians who  
38 have to manage these disorders. Whilst precision medicine is recognised to be of crucial importance,  
39 the evidence allows for no precision in management of the mental health problems so frequently  
40 experienced by people with severe intellectual disabilities. Clinicians can only rely upon the use of  
41 interventions designed for the general population, despite the likely limitations/inaccessibility of these  
42 for people with severe intellectual disabilities.  
43  
44  
45  
46  
47  
48  
49  
50  
51

52 Haloperidol was demonstrated to improve tics, but in a single person. Pimozide was reported  
53 to reduce hyperactivity and other behaviour problems [35], but it is not a recognised treatment for  
54 hyperactivity in the general population; and NICE concludes that there is no evidence that  
55  
56  
57  
58  
59  
60

1  
2  
3 antipsychotics drugs are of use in this condition (NICE, 2016). Whilst it can calm disturbed patients in  
4 the short term through its sedative properties, it is not recommended for this use longer term in view of  
5 potential side-effects which includes death, with its use being reserved for schizophrenia only. Whilst  
6 meeting the inclusion criteria of the review, the study is therefore out-dated given subsequent  
7 advances in knowledge about this class of drugs. Imipramine caused deterioration of affective  
8 symptoms, but the study was poorly designed by today's standards, including the drug not being  
9 prescribed for long enough duration to be effective [32]. Additionally, the use of imipramine has  
10 declined in the whole population since the introduction of selective serotonin reuptake inhibitors in the  
11 1980s and other newer antidepressant agents, on the basis of side-effect profile.

20 Evidence for the effectiveness of psychological interventions is also weak in the absence of  
21 controlled trials or high quality single case experimental designs (such as multiple baseline  
22 approaches). Across intervention types, two studies aimed to reduce tic frequency in people with  
23 severe intellectual disabilities and Gilles de la Tourette Syndrome yielding putative positive effects for  
24 relaxation techniques and treatment with haloperidol. Evidence relating to common mental health  
25 problems (e.g., anxiety, depression) was notably very limited. Studies including children with severe  
26 and profound intellectual disabilities involved different interventions than for studies with adults and  
27 while the geographic spread of the research was diverse, all included studies were conducted in  
28 English speaking countries. Overall, a quantitative synthesis of the evidence was not possible due to  
29 the heterogeneity of the identified studies as no two studies addressed the same mental health problem  
30 with a similar intervention or similar outcome measures. Furthermore, the total sample size across the  
31 five identified studies was only sixteen participants: nine children and seven adults, nine male and  
32 seven female. Finally, the review demonstrates that research in this area has stalled over the last  
33 decade. The most recent study we identified was published nearly two decades ago [34], whilst the  
34 methodologically stronger studies using controlled design employed outdated pharmacotherapies that  
35 are currently not recommended due to their potential side-effects [36, 39].

52 The rigour with which the systematic review was conducted is in stark contrast to the  
53 scientific quality of the identified studies. In line with PRISMA guidelines, the prior publication of the  
54 review protocol enhances its transparency and replicability, whilst double reviewing of full-length  
55 review protocol enhances its transparency and replicability, whilst double reviewing of full-length  
56 review protocol enhances its transparency and replicability, whilst double reviewing of full-length  
57 review protocol enhances its transparency and replicability, whilst double reviewing of full-length  
58 review protocol enhances its transparency and replicability, whilst double reviewing of full-length  
59 review protocol enhances its transparency and replicability, whilst double reviewing of full-length  
60 review protocol enhances its transparency and replicability, whilst double reviewing of full-length

1  
2  
3 articles and quality appraisal strengthens the findings. The current review improves upon previous  
4 reviews in this area by employing a broader scope to identify both psychological and pharmacological  
5 interventions for a range of mental health problems. Whilst the search strategy did not include terms  
6 for every specific possible disorder or potential treatment, it did identify a considerably large number  
7 of records compared to the eventual included studies. Meanwhile, requiring at least 70% people with  
8 severe and profound intellectual disabilities to be included in a sample where outcomes are not  
9 reported separately for this group was a pragmatic decision so people with severe and profound  
10 intellectual disabilities would be sufficiently represented in the review findings. However, reducing  
11 the required proportion of participants with severe and profound intellectual disabilities to 50% would  
12 not have added any eligible studies (a post-review check completed by the first author). A major  
13 challenge in mental health research for people with severe and profound intellectual disabilities,  
14 including this systematic review, lies with the selection of study outcomes. The appropriateness of  
15 measures such as the ABC [37] can be questioned when used to assess the wide spectrum of  
16 symptoms of mental health problems. However, the ABC was found to be one of the few reliable  
17 measures relating to mental health problems for individuals with severe and profound intellectual  
18 disabilities [38]. Indeed, behavioural outcomes can assess key symptoms of mental disorders  
19 according to ICD-10 criteria, but can equally be associated with distress and reduced quality of life.  
20 Whilst this diagnostic taxonomy was practical for conducting the systematic review, it may not be  
21 sufficient to evaluate all relevant interventions aimed at improving the general well-being of people  
22 with severe and profound intellectual disabilities.  
23  
24  
25  
26  
27  
28  
29  
30  
31  
32  
33  
34  
35  
36  
37  
38  
39  
40  
41

42 The scarcity of trials addressing the mental health needs of people with severe and profound  
43 intellectual disabilities is worrisome in light of the fact that they do experience mental health  
44 problems. Yet, there is awareness of the mental health needs in this population amongst researchers  
45 and clinicians, as demonstrated by the wide range of descriptive case reports. These case reports did  
46 not employ an experimental design required to provide empirical evidence for the effectiveness of an  
47 intervention. On a positive note, the 101 studies identified as including at least some individuals with  
48 severe and profound intellectual disabilities show that this population is not routinely excluded from  
49 clinical practice evaluations. Although beyond the objectives of this systematic review, a scoping  
50  
51  
52  
53  
54  
55  
56  
57  
58  
59  
60

1  
2  
3 overview of the range of interventions evaluated in these studies and those being offered in routine  
4 clinical practice could help set the direction to guide future research. Establishing evidence-based  
5 interventions to treat mental health problems in people with severe and profound intellectual  
6 disabilities requires more research with stronger methodological designs.  
7  
8  
9

10 Challenging the status quo and developing an evidence base from which to treat people with  
11 severe and profound intellectual disabilities and mental health problems is a joint responsibility of  
12 practitioners and researchers. Bi-directional knowledge transfer is particularly important in this regard:  
13 research into severe and profound intellectual disabilities making its way into the training of  
14 practitioners, as well as practitioners highlighting difficulties in assessment and treatment that need  
15 addressing. Commissioning and exploring funding opportunities to conduct research into evidence-  
16 based pharmacological and psychological interventions, and an open discussion regarding the ethical  
17 considerations of research involving people who may lack the capacity to consent also require  
18 attention. A large inequality in evidence for effective treatments for mental health problems is  
19 experienced by children and adults with severe and profound intellectual disabilities. Until this  
20 inequality is adequately addressed, health services need to provide treatments found to be effective for  
21 people with mild to moderate intellectual disabilities where they exist- although the availability of  
22 interventions for this population is also poor in comparison to interventions for people without  
23 intellectual disabilities. Particular attention should be given to how these treatments might affect  
24 people with severe and profound intellectual disabilities differently regarding symptom presentation  
25 and outcome assessment, accessibility of a range of psychological therapies, and side effect reporting  
26 which may indicate a need for differences in dosing regimens. Keeping detailed accounts of how  
27 treatments were subsequently modified will benefit the development of a more solid evidence base.  
28  
29  
30  
31  
32  
33  
34  
35  
36  
37  
38  
39  
40  
41  
42  
43  
44  
45  
46  
47  
48  
49  
50  
51  
52  
53  
54  
55  
56  
57  
58  
59  
60



## Acknowledgements

We would like to express our gratitude to Professor Nigel Beail, Professor Michael Kerr and Dr Howard Ring for their contributions to the development of the research proposal.

## Funding

This work was supported by the Baily Thomas Charitable Fund (Reference number: TRUST/RNA/AC/SG/3543/6297), and was sponsored by the University of Warwick (Reference number: REGO-2015-1605).

## Conflicts of interest

The authors have no conflicts of interest to disclose.

## References

1. Hughes-McCormack LA, Rydzewska E, Henderson A, Macintyre C, Rintoul J, Cooper S-A. Prevalence of mental health conditions and relationship with general health in a whole- country population of people with intellectual disabilities compared with the general population. *Br J Psychiatry Open*. 2017;3(5):243–8.
2. Deb S, Thomas M, Bright C. Mental disorder in adults with intellectual disability. 1: Prevalence of functional psychiatric illness among a community-based population aged between 16 and 64 years. *J Intellect Disabil Res*. 2001 Dec;45(6):495–505.
3. Emerson E, Hatton C, Felce D, Murphy G. Learning disabilities : the fundamental facts. 2001.
4. Hastings RP, Hatton C, Taylor JL, Maddison C. Life events and psychiatric symptoms in adults with intellectual disabilities. *J Intellect Disabil Res*. 2004;48(1):42–6.
5. Cordeiro L, Ballinger E, Hagerman R, Hessler D. Clinical assessment of DSM-IV anxiety disorders in fragile X syndrome: prevalence and characterization. *J Neurodev Disord*. 2011;3(1):57–67.
6. Richards C, Moss J, O'Farrell L, Kaur G, Oliver C. Social anxiety in cornelia de lange syndrome. *J Autism Dev Disord*. 2009;39(8):1155–62.

- 1  
2  
3 7. Hyman P, Oliver C, Hall S. Compulsive Behaviors in Cornelia de Lange Syndrome. *Am J*  
4  
5 *Ment Retard.* 2002;107:146–54.
- 6  
7 8. Dykens EM. Anxiety, fears, and phobias in persons with Williams syndrome. *Dev*  
8  
9 *Neuropsychol.* 2003;23(October):291–316.
- 10  
11 9. Bouras N, Clarke D, Boer H, Webb T, Scott P, Frazer S, et al. Prader–Willi syndrome and  
12  
13 psychotic symptoms: I. Case descriptions and genetic studies. *J Intellect Disabil Res.*  
14  
15 1998;42:440–50.
- 16  
17 10. Cooper S-A, Smiley E, Morrison J, Williamson AW, Allan L. Mental ill-health in adults with  
18  
19 intellectual disabilities : prevalence and associated factors. *Br J Psychiatry.* 2007;190:27–36.
- 20  
21 11. Einfeld SL, Tonge BJ. Population prevalence of psychopathology in children and adolescents  
22  
23 with intellectual disability: II epidemiological findings. *J Intellect Disabil Res.* 1996;40(2):99–  
24  
25 109.
- 26  
27 12. Emerson E, Hatton C. Mental health of children and adolescents with intellectual disabilities in  
28  
29 Britain. *Br J Psychiatry.* 2007 Dec;191:493–9.
- 30  
31 13. Hove O, Havik OE. Developmental level and other factors associated with symptoms of mental  
32  
33 disorders and problem behaviour in adults with intellectual disabilities living in the community.  
34  
35 *Soc Psychiatry Psychiatr Epidemiol.* 2010;45:105–13.
- 36  
37 14. Smiley E, Cooper S-A, Finlayson J, Jackson A, Allan L, Mantry D, et al. Incidence and  
38  
39 predictors of mental ill-health in adults with intellectual disabilities: Prospective study. *Br J*  
40  
41 *Psychiatry.* 2007;191:313–9.
- 42  
43 15. Unwin GL, Tsimopoulou I, Azmi S, Stenfert Kroese B. Effectiveness of Cognitive Behavioural  
44  
45 Therapy (CBT) programmes for anxiety or depression in adults with intellectual disabilities: A  
46  
47 review of the literature. *Res Dev Disabil.* 2016;51–52:60–75.
- 48  
49 16. Nicoll M, Beail N, Saxon D. Cognitive behavioural treatment for anger in adults with  
50  
51 intellectual disabilities: A systematic review and meta-analysis. *J Appl Res Intellect Disabil.*  
52  
53 2013 Jan;26(1):47–62.
- 54  
55 17. Vereenooghe L, Langdon PE. Psychological therapies for people with intellectual disabilities:  
56  
57 A systematic review and meta-analysis. *Res Dev Disabil.* 2013 Sep 16;34(11):4085–102.

18. Deb S, Chaplin R, Sohanpal S, Unwin G, Soni R, Lenotre L. The effectiveness of mood stabilizers and antiepileptic medication for the management of behaviour problems in adults with intellectual disability: a systematic review. *J Intellect Disabil Res.* 2008 Feb;52(Pt 2):107–13.
19. Deb S, Sohanpal SK, Soni R, Lenotre L, Unwin G, Lenôtre L, et al. The effectiveness of antipsychotic medication in the management of behaviour problems in adults with intellectual disabilities. *J Intellect Disabil Res.* 2007 Oct;51(10):766–77.
20. Melville CA, Johnson PCD, Smiley E, Simpson N, Purves D, McConnachie A, et al. Problem behaviours and symptom dimensions of psychiatric disorders in adults with intellectual disabilities: An exploratory and confirmatory factor analysis. *Res Dev Disabil.* 2016;55:1–13.
21. Moher D, Liberati A, Tetzlaff J, Altman DG, The PRISMA Group. Preferred reporting items for systematic reviews and meta-analyses: The PRISMA statement. *PLOS Med.* 2009;6(7):e1000097.
22. American Psychiatric Association. *Diagnostic and statistic manual of mental health disorders.* 4th ed. Washington, DC: American Psychiatric Publishing; 1994.
23. Felce D, Kerr M, Hastings RP. A general practice-based study of the relationship between indicators of mental illness and challenging behaviour among adults with intellectual disabilities. *J Intellect Disabil Res.* 2009;53(3):243–54.
24. American Psychiatric Association. *Diagnostic and statistical manual of mental disorders.* third. Washington, DC: American Psychiatric Publishing; 1980.
25. Petticrew M, Roberts H. *Systematic reviews in the social sciences. A practical guide.* London: Blackwell Publishing; 2006.
26. GRADE Working Group. Grading quality of evidence and strength of recommendations. *Br Med J.* 2004;328(7454):1490.
27. Balshem H, Helfand M, Schünemann HJ, Oxman AD, Kunz R, Brozek J, et al. GRADE guidelines 3: Rating the quality of the evidence. *J Clin Epidemiol.* 2011;64(4):401–6.
28. Guyatt GH, Oxman AD, Vist G, Kunz R, Brozek J, Alonso-Coello P, et al. GRADE guidelines: 4. Rating the quality of evidence—study limitations (risk of bias). *J Clin Epidemiol.*

- 2011;64(4):407–15.
29. Singh J. Critical appraisal skills programme. *J Pharmacol Pharmacother.* 2013;4:76–7.
30. Critical Appraisal Skills Programme (CASP). 2014.
31. Horner RH, Carr EG, Halle J, Mcgee G, Odom S, Wolery M. The use of single-subject research to identify evidence-based practice in special education. *Except Child.* 2005;71:165–79.
32. Aman MG, White AJ, Vaithianathan C, Teehan CJ. Preliminary study of imipramine in profoundly retarded residents. *J Autism Dev Disord.* 1986;16(3):263–73.
33. Rosenquist PB, Bodfish JW, Thompson R. Tourette Syndrome associated with mental retardation: A single-subject treatment study with haloperidol. *Am J Ment Retard.* 1997;101(5):497–504.
34. Lindauer SE, DeLeon IG, Fisher WW. Decreasing signs of negative affect and correlated self-injury in an individual with mental retardation and mood disturbances. *J Appl Behav Anal.* 1999;32(1):103–6.
35. White TJR, Aman MG. Pimozide treatment in disruptive severely retarded patients. *Aust New Zeal J Psychiatry.* 1985;19:92–4.
36. Zarkowska EC. A behavioural intervention for Gilles de la Tourette syndrome in a severely mentally handicapped girl. *J Ment Defic Res.* 1989;33(1981):245–53.
37. Aman MG, Singh NN, Stewart AW, Field CJ. The Aberrant Behavior Checklist: A behavior rating scale for the assessment of treatment effects. *Am J Ment Defic.* 1985;89(5):485–91.
38. Flynn S, Vereenoghe L, Hastings RP, Adams D, Cooper S-A, Gore N, et al. Measurement tools for mental health problems and mental well-being in people with severe or profound intellectual disabilities: A systematic review. *Clin Psychol Rev.* 2017;57:32-44.
39. CASP Checklists. Oxford: CASP;

**Authors' contributions**

RH, DA, UC, S-A C, NG, CH, KH, AJ, PEL, RMN, CO, AR, VT, JW, Nigel Beail, Michael Kerr and

Howard Ring conceived the study and acquired funding. LV and RH designed and registered the

review protocol. LV and SF conducted the systematic searches, study selection and data collection.

LV wrote the manuscript.

All authors provided methodological and clinical perspectives, commented on manuscript drafts and

read and approved the final version of this manuscript.

For peer review only

1  
2  
3 **Figure 1.** PRISMA Flow Diagram  
4  
5  
6  
7  
8  
9  
10  
11  
12  
13  
14  
15  
16  
17  
18  
19  
20  
21  
22  
23  
24  
25  
26  
27  
28  
29  
30  
31  
32  
33  
34  
35  
36  
37  
38  
39  
40  
41  
42  
43  
44  
45  
46  
47  
48  
49  
50  
51  
52  
53  
54  
55  
56  
57  
58  
59  
60

For peer review only

**Data sharing statement**

To obtain the full search strategies for each database please contact [leen.vereenoghe@uni-bielefeld.de](mailto:leen.vereenoghe@uni-bielefeld.de) or [s.flynn.1@warwick.ac.uk](mailto:s.flynn.1@warwick.ac.uk).

This systematic review presents previously published data. Please refer to the original articles and their authors for these research data.

For peer review only

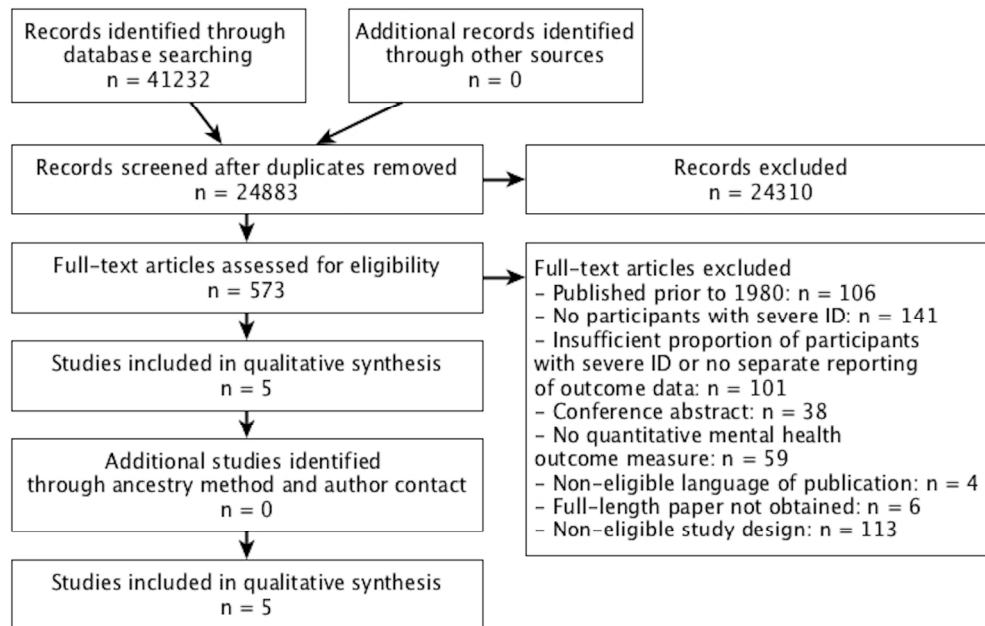

Figure 1. PRISMA Flow Diagram

244x155mm (300 x 300 DPI)



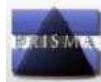

# PRISMA 2009 Checklist

| Section/topic                      | #  | Checklist item                                                                                                                                                                                                                                                                                              | Reported on page # |
|------------------------------------|----|-------------------------------------------------------------------------------------------------------------------------------------------------------------------------------------------------------------------------------------------------------------------------------------------------------------|--------------------|
| <b>TITLE</b>                       |    |                                                                                                                                                                                                                                                                                                             |                    |
| Title                              | 1  | Identify the report as a systematic review, meta-analysis, or both.                                                                                                                                                                                                                                         | 1                  |
| <b>ABSTRACT</b>                    |    |                                                                                                                                                                                                                                                                                                             |                    |
| Structured summary                 | 2  | Provide a structured summary including, as applicable: background; objectives; data sources; study eligibility criteria, participants, and interventions; study appraisal and synthesis methods; results; limitations; conclusions and implications of key findings; systematic review registration number. | 2                  |
| <b>INTRODUCTION</b>                |    |                                                                                                                                                                                                                                                                                                             |                    |
| Rationale                          | 3  | Describe the rationale for the review in the context of what is already known.                                                                                                                                                                                                                              | 6                  |
| Objectives                         | 4  | Provide an explicit statement of questions being addressed with reference to participants, interventions, comparisons, outcomes, and study design (PICOS).                                                                                                                                                  | 6                  |
| <b>METHODS</b>                     |    |                                                                                                                                                                                                                                                                                                             |                    |
| Protocol and registration          | 5  | Indicate if a review protocol exists, if and where it can be accessed (e.g., Web address), and, if available, provide registration information including registration number.                                                                                                                               | 6                  |
| Eligibility criteria               | 6  | Specify study characteristics (e.g., PICOS, length of follow-up) and report characteristics (e.g., years considered, language, publication status) used as criteria for eligibility, giving rationale.                                                                                                      | 13                 |
| Information sources                | 7  | Describe all information sources (e.g., databases with dates of coverage, contact with study authors to identify additional studies) in the search and date last searched.                                                                                                                                  | 7                  |
| Search                             | 8  | Present full electronic search strategy for at least one database, including any limits used, such that it could be repeated.                                                                                                                                                                               | 7                  |
| Study selection                    | 9  | State the process for selecting studies (i.e., screening, eligibility, included in systematic review, and, if applicable, included in the meta-analysis).                                                                                                                                                   | 15                 |
| Data collection process            | 10 | Describe method of data extraction from reports (e.g., piloted forms, independently, in duplicate) and any processes for obtaining and confirming data from investigators.                                                                                                                                  | 15                 |
| Data items                         | 11 | List and define all variables for which data were sought (e.g., PICOS, funding sources) and any assumptions and simplifications made.                                                                                                                                                                       | 13, 15             |
| Risk of bias in individual studies | 12 | Describe methods used for assessing risk of bias of individual studies (including specification of whether this was done at the study or outcome level), and how this information is to be used in any data synthesis.                                                                                      | 15                 |
| Summary measures                   | 13 | State the principal summary measures (e.g., risk ratio, difference in means).                                                                                                                                                                                                                               | n/a                |
| Synthesis of results               | 14 | Describe the methods of handling data and combining results of studies, if done, including measures of consistency (e.g., $I^2$ ) for each meta-analysis.                                                                                                                                                   | n/a                |

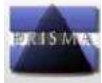

# PRISMA 2009 Checklist

Page 1 of 2

| Section/topic                 | #  | Checklist item                                                                                                                                                                                           | Reported on page # |
|-------------------------------|----|----------------------------------------------------------------------------------------------------------------------------------------------------------------------------------------------------------|--------------------|
| Risk of bias across studies   | 15 | Specify any assessment of risk of bias that may affect the cumulative evidence (e.g., publication bias, selective reporting within studies).                                                             | n/a                |
| Additional analyses           | 16 | Describe methods of additional analyses (e.g., sensitivity or subgroup analyses, meta-regression), if done, indicating which were pre-specified.                                                         | n/a                |
| <b>RESULTS</b>                |    |                                                                                                                                                                                                          |                    |
| Study selection               | 17 | Give numbers of studies screened, assessed for eligibility, and included in the review, with reasons for exclusions at each stage, ideally with a flow diagram.                                          | 16                 |
| Study characteristics         | 18 | For each study, present characteristics for which data were extracted (e.g., study size, PICOS, follow-up period) and provide the citations.                                                             | 17                 |
| Risk of bias within studies   | 19 | Present data on risk of bias of each study and, if available, any outcome level assessment (see item 12).                                                                                                | 22                 |
| Results of individual studies | 20 | For all outcomes considered (benefits or harms), present, for each study: (a) simple summary data for each intervention group (b) effect estimates and confidence intervals, ideally with a forest plot. | 17                 |
| Synthesis of results          | 21 | Present results of each meta-analysis done, including confidence intervals and measures of consistency.                                                                                                  | n/a                |
| Risk of bias across studies   | 22 | Present results of any assessment of risk of bias across studies (see Item 15).                                                                                                                          | n/a                |
| Additional analysis           | 23 | Give results of additional analyses, if done (e.g., sensitivity or subgroup analyses, meta-regression [see Item 16]).                                                                                    | n/a                |
| <b>DISCUSSION</b>             |    |                                                                                                                                                                                                          |                    |
| Summary of evidence           | 24 | Summarize the main findings including the strength of evidence for each main outcome; consider their relevance to key groups (e.g., healthcare providers, users, and policy makers).                     | 27-28              |
| Limitations                   | 25 | Discuss limitations at study and outcome level (e.g., risk of bias), and at review-level (e.g., incomplete retrieval of identified research, reporting bias).                                            | 29                 |
| Conclusions                   | 26 | Provide a general interpretation of the results in the context of other evidence, and implications for future research.                                                                                  | 30                 |
| <b>FUNDING</b>                |    |                                                                                                                                                                                                          |                    |
| Funding                       | 27 | Describe sources of funding for the systematic review and other support (e.g., supply of data); role of funders for the systematic review.                                                               | 31                 |

From: Moher D, Liberati A, Tetzlaff J, Altman DG, The PRISMA Group (2009). Preferred Reporting Items for Systematic Reviews and Meta-Analyses: The PRISMA Statement. PLoS Med 6(7): e1000097. doi:10.1371/journal.pmed1000097

For more information, visit: [www.prisma-statement.org](http://www.prisma-statement.org).

Page 2 of 2

For peer review only - <http://bmjopen.bmj.com/site/about/guidelines.xhtml>

# BMJ Open

## Interventions for mental health problems in children and adults with severe intellectual disabilities: A systematic review

|                                 |                                                                                                                                                                                                                                                                                                                                                                                                                                                                                                                                                                                                                                                                                                                                                                                                                                                                                                                                                                                  |
|---------------------------------|----------------------------------------------------------------------------------------------------------------------------------------------------------------------------------------------------------------------------------------------------------------------------------------------------------------------------------------------------------------------------------------------------------------------------------------------------------------------------------------------------------------------------------------------------------------------------------------------------------------------------------------------------------------------------------------------------------------------------------------------------------------------------------------------------------------------------------------------------------------------------------------------------------------------------------------------------------------------------------|
| Journal:                        | <i>BMJ Open</i>                                                                                                                                                                                                                                                                                                                                                                                                                                                                                                                                                                                                                                                                                                                                                                                                                                                                                                                                                                  |
| Manuscript ID                   | bmjopen-2018-021911.R1                                                                                                                                                                                                                                                                                                                                                                                                                                                                                                                                                                                                                                                                                                                                                                                                                                                                                                                                                           |
| Article Type:                   | Research                                                                                                                                                                                                                                                                                                                                                                                                                                                                                                                                                                                                                                                                                                                                                                                                                                                                                                                                                                         |
| Date Submitted by the Author:   | 03-Apr-2018                                                                                                                                                                                                                                                                                                                                                                                                                                                                                                                                                                                                                                                                                                                                                                                                                                                                                                                                                                      |
| Complete List of Authors:       | Vereenooghe, Leen; Bielefeld University, Faculty of Psychology and Sports Science<br>Flynn, Samantha; University of Warwick, Centre for Educational Development, Appraisal and Research<br>Hastings, Richard; University of Warwick,<br>Adams, Dawn; Griffith University, Autism Centre of Excellence<br>Chauhan, Umesh; University of Central Lancashire, School of Health<br>Cooper, Sally-Ann; Glasgow University , Institute of Health and Wellbeing<br>Gore, Nick; University of Kent, Tizard Centre<br>Hatton, Chris; Lancaster University<br>Hood, Kerenza<br>Jahoda, Andrew; University of Glasgow, Institute of Health and Wellbeing<br>Langdon, PE; Tizard Centre, University of Kent<br>McNamara, Rachel; Cardiff University, Centre for Trials Research<br>Oliver, Chris; University of Birmingham, School of Psychology<br>Roy, Ashok; Coventry and Warwickshire Partnership NHS Trust<br>Totsika, Vasiliki; University of Warwick<br>Waite, Jane; Aston University |
| <b>Primary Subject Heading</b>: | Mental health                                                                                                                                                                                                                                                                                                                                                                                                                                                                                                                                                                                                                                                                                                                                                                                                                                                                                                                                                                    |
| Secondary Subject Heading:      | Pharmacology and therapeutics                                                                                                                                                                                                                                                                                                                                                                                                                                                                                                                                                                                                                                                                                                                                                                                                                                                                                                                                                    |
| Keywords:                       | MENTAL HEALTH, intellectual disabilities, systematic review, psychological therapies, pharmacotherapies                                                                                                                                                                                                                                                                                                                                                                                                                                                                                                                                                                                                                                                                                                                                                                                                                                                                          |
|                                 |                                                                                                                                                                                                                                                                                                                                                                                                                                                                                                                                                                                                                                                                                                                                                                                                                                                                                                                                                                                  |

SCHOLARONE™  
Manuscripts

**Interventions for mental health problems in children and adults with severe intellectual disabilities: A systematic review.**

Dr Leen Vereenooghe<sup>1</sup>, Ms Samantha Flynn<sup>2</sup>, Prof. Richard P Hastings<sup>2,3</sup>, Dr Dawn Adams<sup>4</sup>, Dr Umesh Chauhan<sup>5</sup>, Prof. Sally-Ann Cooper<sup>6</sup>, Dr Nick Gore<sup>7</sup>, Prof. Chris Hatton<sup>8</sup>, Prof. Kerry Hood<sup>9</sup>, Prof. Andrew Jahoda<sup>6</sup>, Prof Dr Peter E Langdon<sup>7</sup>, Dr Rachel McNamara<sup>9</sup>, Prof. Chris Oliver<sup>10</sup>, Dr Ashok Roy<sup>11</sup>, Dr Vasiliki Totsika<sup>3, 12</sup> and Dr Jane Waite<sup>13</sup>

<sup>1</sup> Faculty of Psychology and Sports Science, Bielefeld University, Germany

<sup>2</sup> CEDAR, University of Warwick, UK

<sup>3</sup> Centre for Developmental Psychiatry and Psychology, Department of Psychiatry, School of Clinical Sciences at Monash Health, Monash University

<sup>4</sup> Autism Centre of Excellence, Griffith University, Brisbane, Australia

<sup>5</sup> Mackenzie Chair in Primary Care Medicine, School of Medicine, University of Central Lancashire; UK

<sup>6</sup> Institute of Health and Wellbeing, University of Glasgow, UK

<sup>7</sup> Tizard Centre, University of Kent, Canterbury, UK

<sup>8</sup> Faculty of Health and Medicine, Lancaster University, UK

<sup>9</sup> Centre for Trials Research, Cardiff University, UK

<sup>10</sup> School of Psychology, University of Birmingham, UK

<sup>11</sup> Coventry and Warwickshire Partnership NHS Trust, UK

<sup>12</sup> CES, University of Warwick, UK

<sup>13</sup> School of Life & Health Sciences, Aston University, UK

**Correspondence should be addressed to:**

Junior Professor Dr Leen Vereenooghe, Department of Psychology, Faculty of Psychology and Sports Science, Bielefeld University, PO Box 10 01 31, D-33501 Bielefeld, Germany. Email address: leen.vereenoooghe@uni-bielefeld.de. Telephone: +49 (0)521-106 67521.

**Word count:** 4483

## ABSTRACT

**Objective:** Mental health problems are more prevalent in people with than without intellectual disabilities, yet treatments options have received little attention. The aim of this study was to identify and evaluate the effectiveness of pharmacological and psychological interventions in the treatment of mental health problems in children and adults with severe and profound intellectual disabilities, given their difficulties in accessing standard mental health interventions, particularly talking-therapies, and difficulties reporting drug side-effects.

**Design:** A systematic review using electronic searches of PsycINFO, PsycTESTS, EMBASE, MEDLINE, CINAHL, ERIC, ASSIA, Science Citation Index, Social Science Citation Index, and CENTRAL was conducted to identify eligible intervention studies. Study selection, data extraction and quality appraisal were performed by two independent reviewers.

**Participants:** Study samples included at least 70 % children and/or adults with severe or profound intellectual disabilities or reported the outcomes of this subpopulation separate from participants with other levels of intellectual disabilities.

**Interventions:** Eligible intervention studies evaluated a psychological or pharmacological intervention using a control condition.

**Outcomes:** Symptom severity, frequency or other quantitative dimension (e.g., impact), as assessed with standardised measures of mental health problems.

**Results:** We retrieved 41,232 records, reviewed 573 full-text articles and identified 5 studies eligible for inclusion: 3 studies evaluating pharmacological interventions, and 2 studies evaluating psychological interventions. Study designs ranged from double-blind placebo-controlled crossover trials to single-case experimental reversal designs. Quality appraisals of this very limited literature base revealed good experimental control, poor reporting standards, and a lack of follow-up data.

**Conclusions:** Mental ill-health requires vigorous treatment, yet the current evidence base is too limited to identify with precision effective treatments specifically for children or adults with severe and profound intellectual disabilities. Clinicians therefore must work on the basis of general population evidence, whilst researchers work to generate more precise evidence for people with severe and profound intellectual disabilities.

1  
2  
3  
4  
5  
6  
7  
8  
9  
10  
11  
12  
13  
14  
15  
16  
17  
18  
19  
20  
21  
22  
23  
24  
25  
26  
27  
28  
29  
30  
31  
32  
33  
34  
35  
36  
37  
38  
39  
40  
41  
42  
43  
44  
45  
46  
47  
48  
49  
50  
51  
52  
53  
54  
55  
56  
57  
58  
59  
60

**PROSPERO registration number** CRD 42015024469

**Keywords:** intellectual disability, mental health, systematic review, psychological therapies, pharmacotherapies

For peer review only

### Strengths and limitations of this study

- To our knowledge this is the first systematic review focused on interventions to improve the mental health of both children and adults with severe and profound intellectual disabilities.
- Review eligibility was not restricted to randomised controlled trials which limits the strength of the review's findings.
- The body of evidence we identified was very slim and does not allow for generalisation of findings for either psychological or pharmacological interventions.

## INTRODUCTION

Intellectual disabilities affect approximately 1 percent of the population and are characterised by significantly impaired intellectual and adaptive skills with onset before adulthood. Their prevalence of mental health problems has been reported to be more than seven times higher than for the general population [1]. People with severe and profound intellectual disabilities, as indicated by an intelligence quotient of less than 40, have limitations in problem-solving skills, cognitive and communication skills which can affect their ability to cope with stressful life events. The life circumstances of people with an intellectual disability may increase their risk of developing mental health problems or experiencing mental distress. Factors that have been identified as protective in adults without intellectual disabilities, such as employment opportunities, meaningful day activities and socially supportive networks, may be less likely to be present for people with intellectual disabilities and with additional impact for those with severe and profound intellectual disabilities compared to those with mild or moderate intellectual disabilities [2–4]. Genetic factors may further increase the vulnerability of some people with intellectual disabilities for mental health problems, as evidenced by significant comorbidity rates of anxiety problems and psychosis in people with intellectual disabilities and certain genetic syndromes [5–9].

Mental health problems are as common in people with severe and profound intellectual disabilities as in people with mild or moderate intellectual disabilities, reported to have a point prevalence of 22.4% [10–14]. Their treatment of mental health problems requires particular attention for three main reasons. First, longitudinal research investigating the mental health of children and young people with intellectual disabilities over a 14 year period suggest recovery may be poorer for those with severe intellectual disabilities, and therefore standard treatments may be sub-optimal [10–12]. Second, given their limitations in communication skills and understanding, people with severe and profound intellectual disabilities cannot be assumed to find talking therapies such as CBT-based interventions as accessible as other people do; yet these therapies are considered first line treatments of choice for many types of mental health problems. Third, it is possible that people with intellectual disabilities are more sensitive to the side effects of pharmacotherapies, or have greater difficulties in reporting side-effects when these occur, so raising the potential of more serious consequences, and the



1  
2  
3 need for different dosing regimes compared with other people. The high prevalence and potentially  
4 persistent mental health problems experienced by people with severe and profound intellectual  
5 disabilities thus call for effective interventions to treat such problems and to promote well-being.  
6  
7

8  
9 Existing systematic reviews have evaluated either the psychological or pharmacological  
10 treatment of mental health problems in people with intellectual disabilities. Cognitive behavioural  
11 therapies (CBT) were found to have moderate positive treatment effects for people with intellectual  
12 disabilities who experience anger problems, anxiety and depression [15–17], but these findings are  
13 limited to adults with mild to moderate intellectual disabilities, however, as children or individuals  
14 with severe and profound intellectual disabilities were not represented in the primary studies. Reviews  
15 of pharmacological interventions have largely focused on behaviour problems independent of their  
16 association with mental health problems. For example, potentially effective interventions for  
17 behaviour problems in adults with intellectual disabilities include risperidone, lithium and anti-  
18 epileptic mood stabilisers [18,19]. However, the methodological quality of the evidence and  
19 registered adverse effects indicate that the use of these pharmacological agents requires caution  
20 [18,19]. Whilst behaviour problems can be associated with mental health problems and take on a  
21 precipitating or perpetuating role, they are more indicative of emotional dysregulation than of  
22 psychiatric symptomatology, and have been demonstrated in robust studies to be distinct from other  
23 types of mental health problems [20]. We have not identified reviews on treatment response and side-  
24 effects to pharmacotherapies for other types of mental health problems experienced by people with  
25 severe and profound intellectual disabilities. The objective of the present systematic review was to  
26 evaluate the effectiveness of psychological and pharmacological treatments for mental health  
27 problems and their key symptoms in both children and adults with severe or profound intellectual  
28 disabilities.  
29  
30  
31  
32  
33  
34  
35  
36  
37  
38  
39  
40  
41  
42  
43  
44  
45  
46  
47

## 48 **METHODS**

49  
50 The review was conducted and written in accordance with the Preferred Reporting Items for  
51 Systematic Reviews and Meta-Analyses statement [21]. The review protocol was registered with  
52 PROSPERO, Centre for Reviews and Dissemination, under the reference number CRD 42015024469.  
53  
54  
55  
56  
57  
58  
59  
60

### Search strategy

The search strategy was developed for two conjoint systematic reviews focused on the evaluation of measures of mental health problems and interventions respectively in people with severe and profound intellectual disabilities. Although separate search terms were used for each systematic review, records identified through the respective searches were pooled together prior to the study eligibility screening to ensure that studies piloting an assessment as an intervention outcome measure would also be identified.

Initial systematic searches were conducted in the week of 13 to 17 July 2015 for the following databases: PsycINFO, PsycTESTS, EMBASE, MEDLINE, CINAHL, ERIC, ASSIA, Science Citation Index, Social Science Citation Index, Cochrane Central Register of Controlled Trials (CENTRAL). Searches used Boolean terms to combine search strings for intellectual disabilities, mental health, and psychological or pharmacological interventions. A sample search strategy for the PsycINFO, PsycTESTS and ASSIA searches is provided in the appendix. Full search strategies for each database can be requested from the authors.

Searches were updated in September 2017, to cover the time period from the original searches, and no new studies were identified from these searches. The updated searches followed the same search strategy and study screening protocol as the original searches.

### Study eligibility criteria

The following inclusion criteria were applied to (1) publication type, (2) study design, (3) participants, (4) interventions, and (5) outcomes.

*(1) Publication.* Peer-reviewed publications written in English, French, German or Dutch were eligible for review.

*(2) Study design.* The following study designs were eligible for inclusion in the review: (a) randomised controlled trials, (b) controlled trials without randomisation, (c) single group pre-post designs, (d) case series with outcome measures reported as group mean data, (e) single-case experimental designs, and (f) case-control studies. Observational and retrospective cohort studies, as well as case studies without a control condition or a return to baseline were excluded.

1  
2  
3 (3) *Participants*. To ensure that the outcome data were representative for people with severe  
4 and profound intellectual disabilities it was required that either a minimum of 70% of participants  
5 were diagnosed or reported as having severe or profound intellectual disabilities, or that data for  
6 participants with severe or profound intellectual disabilities were reported separately in the study.  
7  
8 Although this was an arbitrary criterion, this was to ensure that a majority of people with severe or  
9 profound intellectual disabilities were in the study samples. Studies that did not provide any usable  
10 information about the level of intellectual disabilities within samples were excluded. No exclusions  
11 were applied concerning participants' age or gender or any other characteristics except for degree of  
12 intellectual disability.  
13  
14  
15  
16  
17  
18  
19

20 (4) *Intervention*. Eligible psychological interventions were delivered by a trained lay therapist  
21 or qualified professional who systematically applied interventions based on well-established  
22 psychological principles and techniques directly to the person with an intellectual disability, either  
23 individually or in a group. For pharmacological interventions, it was expected that the pharmaceutical  
24 agent was given with regular review by a qualified medical practitioner or health professional, and  
25 recognised at least in principle as a potential treatment for a mental health problem/symptom.  
26  
27  
28  
29  
30  
31

32 (5) *Outcomes*. Eligible outcomes were standardised assessments of mental disorders or their  
33 key symptoms which have a significant impact on daily functioning. However, we acknowledge that  
34 defining the mental and physical components of mental and physical disorders into mutually exclusive  
35 categories can be challenging, not in the least because certain components are symptomatic of multiple  
36 disorders and certain disorders have shown high rates of co-morbidity with one another. For the  
37 purpose of this systematic review, the inclusion criteria for mental disorders and their symptoms were  
38 derived from the DSM-IV [22], as this version was most likely to be used by the primary studies to be  
39 identified by the systematic review. Mental and behavioural disorders, and their key symptoms,  
40 eligible for review fell within the following classifications: (a) attention-deficit and disruptive  
41 behaviour disorders, (b) tic disorders, (c) other disorders of infancy, childhood, or adolescence, (d)  
42 schizophrenia and other psychotic disorders, (e) mood disorders, (f) anxiety disorders, (g) somatoform  
43 disorders, (h) factitious disorders, (i) dissociative disorders, (j) eating disorders, (k) adjustment  
44 disorders, and (l) personality disorders.  
45  
46  
47  
48  
49  
50  
51  
52  
53  
54  
55  
56  
57  
58  
59  
60

1  
2  
3 Studies focused on key symptoms of mental disorders were included as not all treatment offers a  
4 holistic approach, and interventions may instead aim to alleviate one or more symptoms of a disorder.  
5  
6 By contrast, challenging behaviours and behaviour problems may be associated with or indicative of  
7  
8 underlying mental disorders [20,23] but are not recognised as a key diagnostic feature of the above  
9  
10 listed mental disorders and are hence excluded from this review.  
11

12 The broad scope of the systematic review in terms of study designs, type of interventions and  
13  
14 range of participants was advised as initial scoping searches indicated that only few studies included  
15  
16 individuals with severe and profound intellectual disabilities.  
17

18 A single post-hoc exclusion criterion was applied to exclude records from the searches  
19  
20 published prior to 1980 (n=106 records, but not fully checked for inclusion criteria), coinciding with  
21  
22 the publication of the third edition of the Diagnostic and Statistical Manual of Mental Disorders  
23  
24 (DSM-III); [24]. This assured a minimal level of consistency in the recognition and diagnosis of  
25  
26 mental health problems from DSM-III through to DSM-IV. It is likely that there would have been a  
27  
28 delay between the publication of the DSM-III and its first use in published research, but searches back  
29  
30 to 1980 were essential to ensure that no potentially relevant studies were missed.  
31

### 32 **Study selection**

33  
34 Data collection and abstract screening were performed by the first author (LV). Twenty  
35  
36 percent of records were also screened by the second author (SF), leading to an overall agreement rate  
37  
38 of 99.8 % and a Kappa coefficient of 0.91 for studies to proceed to full text evaluation. Second  
39  
40 screening a proportion of results is an accepted practice when a review is large and resources are  
41  
42 limited [25]. The overall inclusion rate for the screening of titles and abstracts was 2.3 %. Full-text  
43  
44 review of 573 articles was performed independently by the two reviewers (LV and SF), which resulted  
45  
46 in a Kappa coefficient of 0.76 for inclusion in the review and the data extraction stage. Eleven  
47  
48 disagreements between the two reviewers were resolved through joint discussion. All disagreements  
49  
50 concerned the proportion of participants with severe and profound intellectual disabilities and were  
51  
52 not related to study design, intervention or outcomes. The review of one full text article required  
53  
54 consultation with the third author (RH) to determine whether this study met the review eligibility  
55  
56 criteria regarding mental health outcomes. Upon discussion, the paper was excluded from the review.  
57  
58  
59

1  
2  
3 Next, reference lists and citation records of all included studies were screened to identify  
4 additional papers that may not have fulfilled the search term criteria. No additional studies were  
5 identified in this way.  
6  
7

### 8 **Data extraction and quality synthesis**

9  
10 Data extraction was conducted by the second author and reviewed by the first author for  
11 variables including: study design, study population, intervention, outcome measures, and follow-up  
12 data.  
13  
14

15  
16 The certainty in the evidence for each outcome measure could not be assessed with the  
17 GRADE approach [26–28], as used by the Cochrane collaboration and national guideline  
18 organisations such as NICE in the UK, due to the incomparability of identified studies in terms of  
19 study design, interventions, and outcomes. Likewise, it was not possible to conduct a meta-analysis or  
20 provide other summary measures because no two studies addressed the same mental health problem  
21 using a similar intervention.  
22  
23  
24  
25  
26  
27

28 Both reviewers independently performed a critical appraisal of all included studies. No  
29 disagreements were recorded at either stage. The assessment followed the Critical Appraisal Skills  
30 Programme [29,30] checklists or the quality indicators for within single-subjects research [31],  
31 dependent on the study design.  
32  
33  
34  
35

### 36 **Patient and public involvement**

37  
38 Patients and public were not involved in the conception, development or implementation of  
39 this systematic review, nor in the selection of outcome measures and the interpretation of the study  
40 findings.  
41  
42  
43

## 44 **RESULTS**

45  
46 The search strategy for the conjoint systematic review identified 24,883 unique records, of  
47 which 573 were retained for full-text eligibility screening. The study selection process is illustrated in  
48 Figure 1. Excluded articles most commonly did not meet the eligibility criteria concerning the severity  
49 of intellectual disabilities of study participants (n = 242). Initial records were also excluded based on  
50 their study design (n = 113), a publication date prior to 1980 (n = 106), because the intervention or  
51 outcomes were not focused on recognised mental health problems (n = 59), due to their publication  
52  
53  
54  
55  
56  
57  
58  
59

1  
2  
3 status (e.g. conference abstracts; n = 38), or because the full-text paper could either not be retrieved (n  
4 = 6) or was published in a non-eligible language (n = 4). In total, five studies were included in the  
5  
6 review and are described in Table 1. Three studies included only adults with intellectual disabilities: a  
7  
8 double-blind placebo-controlled crossover trial [32] and a single-case experimental reversal design of  
9  
10 pharmacotherapy [33], as well as a single-case experimental reversal design of a psychological  
11  
12 intervention [34]. Two studies included children and young people: a randomised trial of  
13  
14 pharmacotherapy by White and Aman [35] and a single-case study of a psychological intervention for  
15  
16 a 13-year old girl [36].  
17  
18  
19  
20  
21  
22  
23  
24  
25  
26  
27  
28  
29  
30  
31  
32  
33  
34  
35  
36  
37  
38  
39  
40  
41  
42  
43  
44  
45  
46  
47  
48  
49  
50  
51  
52  
53  
54  
55  
56  
57  
58  
59  
60

[Figure 1 about here]

**Table 1**

Characteristics of pharmacological and psychological interventions studies.

| First author<br>(Year)                     | Study Design <sup>a</sup>                        | Participants                                                        | Intervention                                           | Outcomes                                                                                                                                                           | Follow-up                                                   |
|--------------------------------------------|--------------------------------------------------|---------------------------------------------------------------------|--------------------------------------------------------|--------------------------------------------------------------------------------------------------------------------------------------------------------------------|-------------------------------------------------------------|
| <i>Psychopharmacological interventions</i> |                                                  |                                                                     |                                                        |                                                                                                                                                                    |                                                             |
| Aman (1986)                                | Double-blind placebo-controlled crossover trial  | Adults with depressive and affective symptoms<br>N = 5 (2M/3F)      | Imipramine (Dumex) or placebo                          | Imipramine caused symptom deterioration for ABC <sup>c</sup> scores related to irritability, lethargy, and hyperactivity.                                          | No follow-up                                                |
|                                            | Within-group randomisation                       | Age range: 18 – 23 years<br>intellectual disabilities               | Duration: 4W                                           |                                                                                                                                                                    |                                                             |
|                                            | I1: Imipramine<br>I2: placebo                    | severity: Slosson IQ <sup>b</sup><br>range 10 -14                   | Dose:<br>3 mg/kg/day                                   | No intervention effects were observed for: stereotypy and inappropriate speech.                                                                                    |                                                             |
|                                            | 1-week washout period between interventions      |                                                                     | Setting: residential ward                              |                                                                                                                                                                    |                                                             |
|                                            |                                                  |                                                                     |                                                        | Statistical data only provided for analyses including a second intervention group, non-eligible for review.                                                        |                                                             |
| Rosenquist (1997)                          | Single-case experimental reversal design (ABABA) | Adult with Gilles de la Tourette syndrome                           | Haloperidol                                            | Weekly observations using Behavioral Observation and Tic Checklist <sup>d</sup> of 3 videotaped conditions: (1) table setting task, (2) mealtime, and (3) waiting. | W6 of increased dosage                                      |
|                                            | A, Baseline<br>B, Haloperidol                    | N = 1, Female<br>Age = 35 years<br>Severe intellectual disabilities | Duration: 22W,<br>A: 2W baseline<br>B: 8W intervention |                                                                                                                                                                    | % time (SD) engaged in tic behavior at W6 (dose 10 mg/day): |
|                                            | Single blind, masked                             |                                                                     | A: 2W baseline<br>B: 8W intervention                   | (1) table setting task, (2) mealtime, and (3) waiting.                                                                                                             | Mealtime:<br>SM-tic: 6.3 (6)                                |

1  
2  
3  
4  
5  
6  
7  
8  
9  
10  
11  
12  
13  
14  
15  
16  
17  
18  
19  
20  
21  
22  
23  
24  
25  
26  
27  
28  
29  
30  
31  
32  
33  
34  
35  
36  
37  
38  
39  
40  
41  
42  
43  
44  
45  
46  
47

For peer review

|              |                                                                                                                             |                                                                                                                                                                                                       |                                                                                                                                      |                                                                                                                                                                                                     |                                                                                                                                                                                                                                                                                                                                                                    |
|--------------|-----------------------------------------------------------------------------------------------------------------------------|-------------------------------------------------------------------------------------------------------------------------------------------------------------------------------------------------------|--------------------------------------------------------------------------------------------------------------------------------------|-----------------------------------------------------------------------------------------------------------------------------------------------------------------------------------------------------|--------------------------------------------------------------------------------------------------------------------------------------------------------------------------------------------------------------------------------------------------------------------------------------------------------------------------------------------------------------------|
|              | assessment                                                                                                                  |                                                                                                                                                                                                       | Dose:<br>-W1: 1 mg/day<br>-W2: 2mg/day<br>-W3-4: 5 mg/day<br>-W5-6: 10 mg/day<br>-W7-8: washout<br><br>Setting: community group home | engaged in tic behavior at baseline and W1 (dose 1mg/day):<br><br>Mealtime:<br>SM-tic: 34.8 (20); 11.0 (12)<br>CM-tic: 13.6 (10); 5.3 (8)<br>SV-tic: 35.4 (28); 2.0 (4)<br>CV-tic: 1.3 (3); 0.0 (0) | CM-tic: 3.0 (3)<br>SV-tic: 1.0 (3)<br>CV-tic: 1.0 (2)<br><br>Waiting:<br>SM-tic: 24.7 (20)<br>CM-tic: 41.5 (18)<br>SV-tic: 48.4 (26)<br>CV-tic: 34.8 (20)<br><br>Dose-specific improvements (10mg/day), reversible<br><br>Waiting:<br>SM-tic: 46.8 (31); 20.8 (26)<br>CM-tic: 41.2 (19); 25.3 (21)<br>SV-tic: 65.3 (29); 69.6 (25)<br>CV-tic: 42.5 (18); 23.0 (18) |
| White (1985) | Double-blind placebo-controlled crossover trial<br><br>I1: Pimozide<br>I2: Placebo<br><br>Randomisation within participants | Inpatients with serious behaviour disturbances, including hyperactivity<br><br>N = 8, 7M/1F<br>Mean age 15.7 years (SD = 3.42)<br>intellectual disabilities severity: moderate to profound; mean IQ = | Pimozide or placebo<br><br>Baseline: 4W<br>Intervention: 4W + 4W<br><br>Dose:<br>I1: 6 mg/day<br>Setting: no info                    | ANCOVA for drug effects and baseline as covariate on ABC subscales<br><br>Pimozide has an effect:<br>Irritability: F = 11.78<br>Hyperactivity: F = 7.69<br><br>No significant effects               | No follow-up                                                                                                                                                                                                                                                                                                                                                       |



|                  |                                                   |                                                                                                                                                        |                                                                                                                                                                                                                                                                |                                                                                                                                                                                                                                                                                                                       |              |
|------------------|---------------------------------------------------|--------------------------------------------------------------------------------------------------------------------------------------------------------|----------------------------------------------------------------------------------------------------------------------------------------------------------------------------------------------------------------------------------------------------------------|-----------------------------------------------------------------------------------------------------------------------------------------------------------------------------------------------------------------------------------------------------------------------------------------------------------------------|--------------|
|                  | 1-week washout period between interventions       | 20.4 (SD = 12.11)                                                                                                                                      |                                                                                                                                                                                                                                                                | for:<br>Lethargy: F = 0.84<br>Stereotypy: F = 3.48<br>Inappropriate speech: F = 1.31                                                                                                                                                                                                                                  |              |
|                  | <i>Psychological interventions</i>                |                                                                                                                                                        |                                                                                                                                                                                                                                                                |                                                                                                                                                                                                                                                                                                                       |              |
| Lindauer (1999)  | Single-case experimental reversal design (ABAB)   | Mood disorder, major depression<br>N = 1, Female<br>Age = 23 years<br>Severe intellectual disabilities                                                 | Enriched environment: 12 items selected for inclusion by paired-choice assessment<br><br>Duration: 57 sessions;<br>A: 11 sessions<br>B: 5 sessions<br>A: 29 sessions<br>B: 12 sessions<br><br>Dose: 10 minute sessions<br><br>Setting: Laboratory, padded room | Percentage of 10-s intervals of signs of negative and positive affect<br><br>Pre: relatively high levels of negative affect (M = 27.4%) and low levels of positive affect (M = 2.3%)<br><br>Post: negative affect decreased (M = 0.1%) and positive affect increased, especially during B2 (M = 11.5% across phases). | No follow-up |
| Zarkowska (1989) | 2 Single-case experimental reversal designs (ABA) | Gilles de la Tourette syndrome<br>N = 1, Female<br>Age = 13 years<br>Severe intellectual disabilities (Griffiths Mental Development Scale score ranged | I1: verbal instructions for relaxation exercises and praise when calm<br>Duration: 10 minutes<br><br>I2: verbal interruption following the occurrence of a verbal tic                                                                                          | I1 reduced tic frequency during relaxation but return to baseline after intervention<br><br>I2 increased vocal tic frequency.                                                                                                                                                                                         | No follow-up |

1  
2  
3  
4  
5  
6  
7  
8  
9  
10  
11  
12  
13  
14  
15  
16  
17  
18  
19  
20  
21  
22  
23  
24  
25  
26  
27  
28  
29  
30  
31  
32  
33  
34  
35  
36  
37  
38  
39  
40  
41  
42  
43  
44  
45  
46  
47

---

|                                                      |                       |                      |                                                            |
|------------------------------------------------------|-----------------------|----------------------|------------------------------------------------------------|
| school activity, tics ignored                        | from 17 to 42 months) | Duration: 10 minutes | After I1 and I2: No generalised reduction in tic frequency |
| I2: interruption                                     |                       |                      |                                                            |
| A, Baseline: school activity, tics ignored           |                       |                      |                                                            |
| B, interruption                                      |                       |                      |                                                            |
| A, Baseline: return to school activity, tics ignored |                       |                      |                                                            |

---

*Note.* I1, intervention 1; I2, intervention 2; G1, group 1; G2, group 2; Gender ratio expressed as Male/Female; W1, week 1; SD, standard deviation. Outcomes reported for primary outcome measure only, unless where mental health or mental well-being outcome measure were recorded as secondary outcome measures.

<sup>a</sup> AB designs with A: baseline and B: treatment.

<sup>b</sup> Slosson IQ scores correlate highly with Stanford Binet Intelligence Test scores and correlate with the Cattell Infant Intelligence Scale when used with children under the age of 2 (Slosson, 1975).

<sup>c</sup> ABC, Aberrant Behavior Checklist.

<sup>d</sup> SM-tic, simple motor tic; CM-tic, complex motor tic; SV-tic, simple vocal tic; CV-tic, complex vocal tic.

## Psychological interventions

Two studies evaluated interventions based on psychological principles. Interventions were offered for symptoms of depressive disorder and to manage tic frequency in Gilles de la Tourette syndrome.

In a single-case experimental ABAB design, Lindauer and colleagues [34] offered an enriched environment for the management of major depressive disorder in a 23-year old woman with severe intellectual disabilities who also presented with self-injurious behaviour. Pre-existing treatment of the mood disorder with carbamazepine (5.3 mg/kg/day) was continued during the study. The enriched environment setting was a 3 metre by 3 metre padded room, in an inpatient unit, in which stimuli were present that were chosen following a paired-choice assessment to identify the woman's preferred stimuli and assess signs of positive and negative affect. Smiling, giggling and laughing were considered examples of positive 'affect', whereas frowning, whining, crying and verbal expressions such as "I am sad" were identified as signs of negative 'affect'. No other outcome measures relating to the mood disorder were employed. Behavioural observations, through a one-way mirror, showed that the enriched environment increased signs of positive affect and decreased signs of negative affect, in particular during the second intervention phase. The lack of follow-up measures and the delivery of interventions in a padded room in an inpatient setting reduce the ecological validity of this intervention. Likewise, the replicability of findings is impeded in terms of participant selection and intervention fidelity (see Table 2).

Zarkowska et al. [36] adopted a basic single-case experimental design to examine interventions for vocal and motor tics in a 13-year old girl with Gilles de la Tourette syndrome and severe intellectual disabilities. Two treatment probes, cued relaxation and interruption, were evaluated using an ABA return to baseline design for each intervention comprised of a five minute baseline recording, a five minute intervention, and a five minute post-baseline recording. Cued relaxation appeared to lead to better outcomes but neither intervention had lasting effects and interruption increased vocal tic frequency. The study design showed strong external and social validity and provided clear descriptions of dependent and independent variables (see Table 2). However, internal

validity was weak and the ABA design was not the most suitable for demonstrating experimental control. Following the evaluation of treatment probes, the study continued as an A-B case study implementing successive interventions of relaxation training, treatment with clonidine and treatment with pimozide. Due to the non-controlled nature of these interventions, their respective outcome data and follow-up data were not considered eligible for inclusion in this review.

The replicability of findings from both studies is hindered by a lack of information regarding participant selection, physical setting of the intervention, implementation fidelity, and the reliability of outcome measurements.

**Table 2**

Quality appraisal of single-subject studies using the Quality Indicators Within Single-Subject Research [31].

| Quality indicator                                          | Lindauer et al. (1999) | Rosenquist et al. (1997) | Zarkowska (1989) |
|------------------------------------------------------------|------------------------|--------------------------|------------------|
| <i>Participant description and setting</i>                 |                        |                          |                  |
| Ability to select individuals with similar characteristics | yes                    | yes                      | yes              |
| Replicability of participant selection process             | no                     | no                       | no               |
| Replicability of physical setting                          | yes                    | yes                      | partial          |
| <i>Dependent variable</i>                                  |                        |                          |                  |
| Described with operational precision                       | yes                    | yes                      | yes              |
| Measured to generate a quantifiable index                  | yes                    | yes                      | yes              |
| Measure is valid and replicable                            | yes                    | yes                      | yes              |
| Measurements repeated over time                            | yes                    | yes                      | no               |
| Measures assessed in terms of reliability or inter-        | yes                    | yes                      | no               |

---

observer agreement

*Independent variable*

|                                                              |     |                |     |
|--------------------------------------------------------------|-----|----------------|-----|
| Described with replicable precision                          | yes | yes            | yes |
| Systematically manipulated and under control of experimenter | yes | yes            | yes |
| Overt measure of implementation fidelity                     | no  | not applicable | no  |

*Baseline*

|                                     |     |     |     |
|-------------------------------------|-----|-----|-----|
| Repeated measurements baseline      | yes | yes | no  |
| Described with replicable precision | yes | yes | yes |

*Experimental control / Internal validity*

|                                                                        |         |     |         |
|------------------------------------------------------------------------|---------|-----|---------|
| Minimum of 3 demonstrations of experimental effect at 3 points in time | yes     | yes | no      |
| Controlling for threats to internal validity                           | unclear | yes | unclear |
| Document a pattern of experimental control                             | yes     | yes | yes     |

*External Validity*

|                                                                |     |     |    |
|----------------------------------------------------------------|-----|-----|----|
| Effects replicated across participants, settings, or materials | yes | yes | no |
|----------------------------------------------------------------|-----|-----|----|

*Social validity*

|                                          |     |     |     |
|------------------------------------------|-----|-----|-----|
| Dependent variable is socially important | yes | yes | yes |
|------------------------------------------|-----|-----|-----|

---

|                                                                                                                             |     |     |     |
|-----------------------------------------------------------------------------------------------------------------------------|-----|-----|-----|
| Magnitude of change is socially important                                                                                   | yes | yes | yes |
| Implementation of independent variable is practical and cost-effective                                                      | yes | yes | yes |
| Implementation of independent variable over extended period of time, by typical intervention agents and in typical contexts | yes | yes | yes |

### Pharmacological interventions

Two double-blind placebo-controlled crossover trials and one single-case experimental reversal design evaluated pharmacological interventions for use in people with severe intellectual disabilities and mental health problems.

Aman and colleagues [32] employed within-group randomisation of order of administration of 4 week treatment with imipramine, in a dosage of 3 mg/kg/day, and 4 weeks with placebo, with one week drug-free in between. Interventions were offered to five adults with severe intellectual disabilities and depressive symptoms, in addition to a group of five adults with acting-out behaviours. The latter were not eligible for inclusion in this review as these behaviours were not considered a mental health problem. Eligible depressive symptoms were based on evidence from prior research studies and required behavioural observation instead of information obtained from diagnostic interviews. Symptoms included 'seclusion and social withdrawal, sleep loss, weight loss, tearfulness or the appearance of sad affect, and a pervasive lack of overt behavior' [31, p. 265]. Intervention effects were assessed with the Aberrant Behavior Checklist [37] and indicated imipramine to have a detrimental effect on symptoms related to irritability, lethargy, and hyperactivity, and no effect on stereotypical behaviours and inappropriate speech. Adverse effects were recorded but not described separately for the five adults with severe intellectual disabilities and depressive symptoms. For one person with affective symptoms, imipramine was found to improve behaviour and relieve chronic constipation.

White and Aman [35] evaluated the use of pimozone on maladaptive behaviours and hyperactivity, in young people and adults with moderate to profound intellectual disabilities.

Following a four-week baseline, the eight participants received two four-week treatments with either pimozone, in a dosage of 0.12 mg/kg/day, or placebo, with a one-week washout period between intervention phases. Treatment effects were evaluated using assessments with the ABC for the last three weeks of each intervention. Hyperactivity scores on the ABC reduced following the intervention, as did irritability levels, based on nurses' behaviour ratings of participants. No intervention effects were observed for ABC lethargy, stereotypy, and inappropriate speech domains. Furthermore, behavioural observations also did not identify any treatment effects.

The methodological quality of these two studies was confirmed using the CASP quality appraisal checklist (see Table 3). However, follow-up measures were notably absent and sample sizes too small to provide sufficient power for the conducted statistical analyses. Additionally, the period of treatment was of too short duration, as imipramine can take up to 6 weeks to be effective in the general population, so that intervention was of poor design.

**Table 3**

Critical Appraisal Skills Programme (CASP Checklists)[38] for studies with N > 1.

| Quality indicator                                      | Aman et al. (1986) <sup>a</sup>                 | White et al. (1985)                             |
|--------------------------------------------------------|-------------------------------------------------|-------------------------------------------------|
|                                                        |                                                 | a                                               |
| <i>Validity of the results</i>                         |                                                 |                                                 |
| Study addresses a clearly focused issue                | yes                                             | yes                                             |
| Cohort recruited in an acceptable way                  | yes                                             | yes                                             |
| Exposure accurately measured to minimise bias          | yes                                             | yes                                             |
| Outcome accurately measured to minimise bias           | yes                                             | yes                                             |
| Identification of all important confounding factors    | yes                                             | yes                                             |
| Design and/or analysis account for confounding factors | No: length of intervention too short to observe | No: length of intervention too short to observe |

|                                           |                                                                                                                    |                                                                                                                      |
|-------------------------------------------|--------------------------------------------------------------------------------------------------------------------|----------------------------------------------------------------------------------------------------------------------|
|                                           | treatment effects.                                                                                                 | treatment effects.                                                                                                   |
| Complete enough follow-up of participants | no                                                                                                                 | no                                                                                                                   |
| Long enough follow-up of participants     | no                                                                                                                 | no                                                                                                                   |
| <i>Scope of the results</i>               |                                                                                                                    |                                                                                                                      |
| Description of study results              | yes                                                                                                                | yes                                                                                                                  |
| Precision of study results                | No exact p-values,<br>no effect sizes, no<br>differentiation<br>between<br>depressive-like and<br>acting-out group | No exact p-values,<br>no effect sizes                                                                                |
| Believability of study results            | yes                                                                                                                | yes                                                                                                                  |
| <i>Impact of the results</i>              |                                                                                                                    |                                                                                                                      |
| Results applicable to local population    | Yes                                                                                                                | Yes                                                                                                                  |
| Results in line with available evidence   | no                                                                                                                 | Yes                                                                                                                  |
| Implications for practice                 | Length of<br>intervention too<br>short to draw<br>conclusions<br>regarding<br>implications                         | The study is now<br>out-dated given<br>improved<br>knowledge on the<br>risks of the long-<br>term use of the<br>drug |

---

*Note.*<sup>a</sup> CASP Checklist for Randomised Controlled Trials.



1  
2  
3 The only fully experimental single subject experimental design study evaluated the effect of  
4 haloperidol on tic frequency in a 35-year old woman with Gilles de la Tourette syndrome and severe  
5 intellectual disabilities [33]. Using an ABABA design, the dose of haloperidol was gradually increased  
6 during the intervention phases and maximal effectiveness was reached with the highest dosage of 10  
7 mg/day. Weekly behavioural observation at the community residential setting where the participant  
8 lived showed reduced tic frequencies during mealtimes, nearing zero-levels, and during waiting times.  
9 Intervention effects reversed when the dose was lowered. These findings are considered reliable due to  
10 masked assessment and reversal design, alongside the replicability of measures and intervention, see  
11 Table 2.  
12  
13  
14  
15  
16  
17  
18  
19

### 20 **Overall quality appraisal of the evidence base**

21 Methodological quality of the identified studies was poor, with concern in terms of small  
22 sample sizes, lack of masked assessment, and lack of follow-up measures. By contrast, reporting  
23 standards were generally high in terms of variable descriptions and the internal and external validity of  
24 the results. Implications of the quality appraisal are integrated in the study descriptions above, whereas  
25 a detailed overview of the quality review for each study is reported in Tables 2 and 3.  
26  
27  
28  
29  
30  
31

## 32 **DISCUSSION**

33  
34 Despite their very high rates of mental health problems, there is a lack of research in  
35 interventions that explicitly target mental health problems in people with severe and profound  
36 intellectual disabilities. The scope of this review was wide. However, only five studies were eligible  
37 for inclusion and the findings are inconclusive at best. This is highly problematic for clinicians who  
38 have to manage these disorders and can only rely upon the use of interventions designed for the  
39 general population, despite the likely limitations/inaccessibility of these for people with severe  
40 intellectual disabilities.  
41  
42  
43  
44  
45  
46  
47

48 Haloperidol was demonstrated to improve tics, but in a single person. Pimozide was reported  
49 to reduce hyperactivity and other behaviour problems [35], but it is not a recognised treatment for  
50 hyperactivity in the general population; and NICE concludes that there is no evidence that  
51 antipsychotics drugs are of use in this condition (NICE, 2016). Whilst it can calm disturbed patients in  
52 the short term through its sedative properties, it is not recommended for this use longer term in view of  
53  
54  
55  
56  
57  
58  
59

1  
2  
3 potential side-effects which includes death, with its use being reserved for schizophrenia only. Whilst  
4 meeting the inclusion criteria of the review, the study is therefore out-dated given subsequent  
5 advances in knowledge about this class of drugs. Imipramine caused deterioration of affective  
6 symptoms, but the study was poorly designed by today's standards, including the drug not being  
7 prescribed for long enough duration to be effective [32]. Additionally, the use of imipramine has  
8 declined in the whole population since the introduction of selective serotonin reuptake inhibitors in the  
9 1980s and other newer antidepressant agents, on the basis of side-effect profile. Empirical evidence for  
10 current pharmacological interventions has not yet been published.

11  
12  
13  
14  
15  
16  
17  
18  
19 Evidence for the effectiveness of psychological interventions is also weak in the absence of  
20 controlled trials or high quality single case experimental designs (such as multiple baseline  
21 approaches). Across intervention types, two studies aimed to reduce tic frequency in people with  
22 severe intellectual disabilities and Gilles de la Tourette Syndrome yielding putative positive effects for  
23 relaxation techniques and treatment with haloperidol. Evidence relating to common mental health  
24 problems (e.g., anxiety, depression) was notably very limited. Studies including children with severe  
25 and profound intellectual disabilities involved different interventions than for studies with adults and  
26 while the geographic spread of the research was diverse, all included studies were conducted in  
27 English speaking countries. Overall, a quantitative synthesis of the evidence was not possible due to  
28 the heterogeneity of the identified studies as no two studies addressed the same mental health problem  
29 with a similar intervention or similar outcome measures. Furthermore, the total sample size across the  
30 five identified studies was only sixteen participants: nine children and seven adults, nine male and  
31 seven female. Finally, the review demonstrates that research in this area has stalled over the last  
32 decade. The most recent study we identified was published nearly two decades ago [34], whilst the  
33 methodologically stronger studies using controlled design employed outdated pharmacotherapies that  
34 are currently not recommended due to their potential side-effects [36, 39].

### 50 **Strengths and limitations**

51  
52 Strengths of this systematic review are the rigour with which it was conducted. In line with  
53 PRISMA guidelines, the prior publication of the review protocol enhances its transparency and  
54 replicability, whilst double reviewing of full-length articles and quality appraisal strengthens the  
55  
56  
57  
58  
59

1  
2  
3 findings. The current review improves upon previous reviews in this area by employing a broader  
4 scope to identify both psychological and pharmacological interventions for a range of mental health  
5 problems.  
6  
7

8  
9 Limitations of the study relate to the search strategy. The systematic search did not include  
10 terms for every specific possible disorder or potential treatment, neither did it include a wide range of  
11 behavioural descriptions. In spite of this, we identified a considerably large number of potential  
12 records. Meanwhile, requiring at least 70% people with severe and profound intellectual disabilities to  
13 be included in a sample where outcomes are not reported separately for this group was a pragmatic  
14 decision so people with severe and profound intellectual disabilities would be sufficiently represented  
15 in the review findings. However, reducing the required proportion of participants with severe and  
16 profound intellectual disabilities to 50% would not have added any eligible studies (a post-review  
17 check completed by the first author).  
18  
19  
20  
21  
22  
23  
24  
25

### 26 **Explanations and implications**

27  
28 A major challenge in mental health research for people with severe and profound intellectual  
29 disabilities, including this systematic review, lies with the selection of study outcomes. The  
30 appropriateness of measures such as the ABC [37] can be questioned when used to assess the wide  
31 spectrum of symptoms of mental health problems. However, the ABC was found to be one of the few  
32 reliable measures relating to mental health problems for individuals with severe and profound  
33 intellectual disabilities [38]. Indeed, behavioural outcomes can assess key symptoms of mental  
34 disorders according to ICD-10 criteria, but can equally be associated with distress and reduced quality  
35 of life. Whilst this diagnostic taxonomy was practical for conducting the systematic review, it may not  
36 be sufficient to evaluate all relevant interventions aimed at improving the general well-being of people  
37 with severe and profound intellectual disabilities.  
38  
39  
40  
41  
42  
43  
44  
45  
46  
47

48 The scarcity of trials addressing the mental health needs of people with severe and profound  
49 intellectual disabilities is worrisome in light of the fact that they do experience mental health  
50 problems. Yet, there is awareness of the mental health needs in this population amongst researchers  
51 and clinicians as is evident from the wide range of descriptive case reports, which did not provide  
52 empirical evidence for the effectiveness of an intervention. On a positive note, the 101 studies  
53  
54  
55  
56  
57  
58  
59  
60

1  
2  
3 identified as including at least some individuals with severe and profound intellectual disabilities show  
4 that this population is not routinely excluded from clinical practice evaluations. Although beyond the  
5 objectives of this systematic review, a scoping overview of the range of interventions evaluated in  
6 these studies and those being offered in routine clinical practice could help set the direction to guide  
7 future research. Establishing evidence-based interventions to treat mental health problems in people  
8 with severe and profound intellectual disabilities requires more research with stronger methodological  
9 designs.  
10  
11  
12  
13  
14  
15

### 16 **Future directions**

17  
18 Challenging the status quo and developing an evidence base from which to treat people with  
19 severe and profound intellectual disabilities and mental health problems is a joint responsibility of  
20 practitioners and researchers. Bi-directional knowledge transfer is particularly important in this regard:  
21 research into severe and profound intellectual disabilities making its way into the training of  
22 practitioners, as well as practitioners highlighting difficulties in assessment and treatment that need  
23 addressing. Commissioning and exploring funding opportunities to conduct research into evidence-  
24 based pharmacological and psychological interventions, and an open discussion regarding the ethical  
25 considerations of research involving people who may lack the capacity to consent also require  
26 attention. A large inequality in evidence for effective treatments for mental health problems is  
27 experienced by children and adults with severe and profound intellectual disabilities. Until this  
28 inequality is adequately addressed, health services need to provide treatments found to be effective for  
29 people with mild to moderate intellectual disabilities where they exist- although the availability of  
30 interventions for this population is also poor in comparison to interventions for people without  
31 intellectual disabilities. Particular attention should be given to how these treatments might affect  
32 people with severe and profound intellectual disabilities differently regarding symptom presentation  
33 and outcome assessment, accessibility of a range of psychological therapies, and side effect reporting  
34 which may indicate a need for differences in dosing regimens. Keeping detailed accounts of how  
35 treatments were subsequently modified will benefit the development of a more solid evidence base.  
36  
37  
38  
39  
40  
41  
42  
43  
44  
45  
46  
47  
48  
49  
50  
51  
52  
53  
54  
55  
56  
57  
58  
59  
60

## Acknowledgements

We would like to express our gratitude to Professor Nigel Beail, Professor Michael Kerr and Dr Howard Ring for their contributions to the development of the research proposal.

## Funding

This work was supported by the Baily Thomas Charitable Fund (Reference number: TRUST/RNA/AC/SG/3543/6297), and was sponsored by the University of Warwick (Reference number: REGO-2015-1605).

## Conflicts of interest

The authors have no conflicts of interest to disclose.

## References

1. Hughes-McCormack LA, Rydzewska E, Henderson A, Macintyre C, Rintoul J, Cooper S-A. Prevalence of mental health conditions and relationship with general health in a whole- country population of people with intellectual disabilities compared with the general population. *Br J Psychiatry Open*. 2017;3(5):243–8.
2. Deb S, Thomas M, Bright C. Mental disorder in adults with intellectual disability. 1: Prevalence of functional psychiatric illness among a community-based population aged between 16 and 64 years. *J Intellect Disabil Res*. 2001 Dec;45(6):495–505.
3. Emerson E, Hatton C, Felce D, Murphy G. Learning disabilities : the fundamental facts. 2001.
4. Hulbert-Williams L, Hastings RP. Life events as a risk factor for psychological problems in individuals with intellectual disabilities: A critical review. *J Intellect Disabil Res*. 2008 Nov;52(11):883–95.
5. Cordeiro L, Ballinger E, Hagerman R, Hessler D. Clinical assessment of DSM-IV anxiety disorders in fragile X syndrome: prevalence and characterization. *J Neurodev Disord*. 2011;3(1):57–67.
6. Richards C, Moss J, O'Farrell L, Kaur G, Oliver C. Social anxiety in cornelia de lange

- 1  
2  
3 syndrome. *J Autism Dev Disord*. 2009;39(8):1155–62.
- 4  
5 7. Hyman P, Oliver C, Hall S. Compulsive Behaviors in Cornelia de Lange Syndrome. *Am J*  
6  
7 *Ment Retard*. 2002;107:146–54.
- 8  
9 8. Dykens EM. Anxiety, fears, and phobias in persons with Williams syndrome. *Dev*  
10  
11 *Neuropsychol*. 2003;23(October):291–316.
- 12  
13 9. Krefft M, Frydecka D, Adamowski T, Misiak B. From Prader–Willi syndrome to psychosis:  
14  
15 translating parent-of-origin effects into schizophrenia research. *Futur Med*. 2014;6(6):677–88.
- 16  
17 10. Cooper S-A, Smiley E, Morrison J, Williamson AW, Allan L. Mental ill-health in adults with  
18  
19 intellectual disabilities : prevalence and associated factors. *Br J Psychiatry*. 2007;190:27–36.
- 20  
21 11. Einfeld SL, Tonge BJ. Population prevalence of psychopathology in children and adolescents  
22  
23 with intellectual disability: II epidemiological findings. *J Intellect Disabil Res*. 1996;40(2):99–  
24  
25 109.
- 26  
27 12. Emerson E, Hatton C. Mental health of children and adolescents with intellectual disabilities in  
28  
29 Britain. *Br J Psychiatry*. 2007 Dec;191:493–9.
- 30  
31 13. Hove O, Havik OE. Developmental level and other factors associated with symptoms of mental  
32  
33 disorders and problem behaviour in adults with intellectual disabilities living in the community.  
34  
35 *Soc Psychiatry Psychiatr Epidemiol*. 2010;45:105–13.
- 36  
37 14. Smiley E, Cooper S-A, Finlayson J, Jackson A, Allan L, Mantry D, et al. Incidence and  
38  
39 predictors of mental ill-health in adults with intellectual disabilities: Prospective study. *Br J*  
40  
41 *Psychiatry*. 2007;191:313–9.
- 42  
43 15. Unwin GL, Tsimopoulou I, Azmi S, Stenfert Kroese B. Effectiveness of Cognitive Behavioural  
44  
45 Therapy (CBT) programmes for anxiety or depression in adults with intellectual disabilities: A  
46  
47 review of the literature. . *Res Dev Disabil*. 2016;51–52:60–75.
- 48  
49 16. Nicoll M, Beail N, Saxon D. Cognitive behavioural treatment for anger in adults with  
50  
51 intellectual disabilities: A systematic review and meta-analysis. *J Appl Res Intellect Disabil*.  
52  
53 2013 Jan;26(1):47–62.
- 54  
55 17. Vereenooghe L, Langdon PE. Psychological therapies for people with intellectual disabilities:  
56  
57 A systematic review and meta-analysis. *Res Dev Disabil*. 2013 Sep 16;34(11):4085–102.
- 58  
59  
60

- 1  
2  
3 18. Deb S, Chaplin R, Sohanpal S, Unwin G, Soni R, Lenotre L. The effectiveness of mood  
4 stabilizers and antiepileptic medication for the management of behaviour problems in adults  
5 with intellectual disability: a systematic review. *J Intellect Disabil Res.* 2008 Feb;52(Pt 2):107–  
6  
7 13.  
8  
9
- 10 19. Deb S, Sohanpal SK, Soni R, Lenotre L, Unwin G, Lenôtre L, et al. The effectiveness of  
11 antipsychotic medication in the management of behaviour problems in adults with intellectual  
12 disabilities. *J Intellect Disabil Res.* 2007 Oct;51(10):766–77.  
13  
14
- 15 20. Melville CA, Johnson PCD, Smiley E, Simpson N, Purves D, McConnachie A, et al. Problem  
16 behaviours and symptom dimensions of psychiatric disorders in adults with intellectual  
17 disabilities: An exploratory and confirmatory factor analysis. *Res Dev Disabil.* 2016;55:1–13.  
18  
19
- 20 21. Moher D, Liberati A, Tetzlaff J, Altman DG, The PRISMA Group. Preferred reporting items  
21 for systematic reviews and meta-analyses: The PRISMA statement. *PLOS Med.*  
22 2009;6(7):e1000097.  
23  
24
- 25 22. American Psychiatric Association. Diagnostic and statistic manual of mental health disorders.  
26 4th ed. Washington, DC: American Psychiatric Publishing; 1994.  
27  
28
- 29 23. Felce D, Kerr M, Hastings RP. A general practice-based study of the relationship between  
30 indicators of mental illness and challenging behaviour among adults with intellectual  
31 disabilities. *J Intellect Disabil Res.* 2009;53(3):243–54.  
32  
33
- 34 24. American Psychiatric Association. Diagnostic and statistical manual of mental disorders. third.  
35 Washington, DC: American Psychiatric Publishing; 1980.  
36  
37
- 38 25. Petticrew M, Roberts H. Systematic reviews in the social sciences. A practical guide. London:  
39 Blackwell Publishing; 2006.  
40  
41
- 42 26. GRADE Working Group. Grading quality of evidence and strength of recommendations. *Br*  
43 *Med J.* 2004;328(7454):1490.  
44  
45
- 46 27. Balshem H, Helfand M, Schünemann HJ, Oxman AD, Kunz R, Brozek J, et al. GRADE  
47 guidelines 3: Rating the quality of the evidence. *J Clin Epidemiol.* 2011;64(4):401–6.  
48  
49
- 50 28. Guyatt GH, Oxman AD, Vist G, Kunz R, Brozek J, Alonso-Coello P, et al. GRADE guidelines:  
51 4. Rating the quality of evidence—study limitations (risk of bias). *J Clin Epidemiol.*  
52  
53  
54  
55  
56  
57  
58  
59

- 1  
2  
3 2011;64(4):407–15.
- 4  
5 29. Singh J. Critical appraisal skills programme. *J Pharmacol Pharmacother*. 2013;4:76–7.
- 6  
7 30. Critical Appraisal Skills Programme (CASP). 2014.
- 8  
9 31. Horner RH, Carr EG, Halle J, Mcgee G, Odom S, Wolery M. The use of single-subject  
10 research to identify evidence-based practice in special education. *Except Child*. 2005;71:165–  
11 79.
- 12  
13  
14 32. Aman MG, White AJ, Vaithianathan C, Teehan CJ. Preliminary study of imipramine in  
15 profoundly retarded residents. *J Autism Dev Disord*. 1986;16(3):263–73.
- 16  
17  
18 33. Rosenquist PB, Bodfish JW, Thompson R. Tourette Syndrome associated with mental  
19 retardation: A single-subject treatment study with haloperidol. *Am J Ment Retard*.  
20 1997;101(5):497–504.
- 21  
22  
23  
24 34. Lindauer SE, DeLeon IG, Fisher WW. Decreasing signs of negative affect and correlated self-  
25 injury in an individual with mental retardation and mood disturbances. *J Appl Behav Anal*.  
26 1999;32(1):103–6.
- 27  
28  
29  
30 35. White TJR, Aman MG. Pimozide treatment in disruptive severely retarded patients. *Aust New*  
31 *Zeal J Psychiatry*. 1985;19:92–4.
- 32  
33  
34 36. Zarkowska EC. A behavioural intervention for Gilles de la Tourette syndrome in a severely  
35 mentally handicapped girl. *J Ment Defic Res*. 1989;33(1981):245–53.
- 36  
37  
38 37. Aman MG, Singh NN, Stewart AW, Field CJ. The Aberrant Behavior Checklist: A behavior  
39 rating scale for the assessment of treatment effects. *Am J Ment Defic*. 1985;89(5):485–91.
- 40  
41  
42 38. CASP Checklists. Oxford: CASP;
- 43  
44 39. Flynn S, Vereenoghe L, Hastings RP, Adams D, Cooper S-A, Gore N, et al. Measurement  
45 tools for mental health problems and mental well-being in people with severe or profound  
46 intellectual disabilities: A systematic review. *Clin Psychol Rev*. 2017;57:32–44.
- 47  
48  
49  
50  
51  
52  
53  
54  
55  
56  
57  
58  
59  
60



**Authors' contributions**

RH, DA, UC, S-A C, NG, CH, KH, AJ, PEL, RMN, CO, AR, VT, JW, Nigel Beail, Michael Kerr and

Howard Ring conceived the study and acquired funding. LV and RH designed and registered the

review protocol. LV and SF conducted the systematic searches, study selection and data collection.

LV wrote the manuscript.

All authors provided methodological and clinical perspectives, commented on manuscript drafts and

read and approved the final version of this manuscript.

For peer review only

1  
2  
3  
4  
5  
6  
7  
8  
9  
10  
11  
12  
13  
14  
15  
16  
17  
18  
19  
20  
21  
22  
23  
24  
25  
26  
27  
28  
29  
30  
31  
32  
33  
34  
35  
36  
37  
38  
39  
40  
41  
42  
43  
44  
45  
46  
47  
48  
49  
50  
51  
52  
53  
54  
55  
56  
57  
58  
59  
60

**Figure 1.** PRISMA Flow Diagram

For peer review only

### Data sharing statement

To obtain the full search strategies for each database please contact [leen.vereenoghe@uni-bielefeld.de](mailto:leen.vereenoghe@uni-bielefeld.de) or [s.flynn.1@warwick.ac.uk](mailto:s.flynn.1@warwick.ac.uk).

This systematic review presents previously published data. Please refer to the original articles and their authors for these research data.

For peer review only

1  
2  
3  
4  
5  
6  
7  
8  
9  
10  
11  
12  
13  
14  
15  
16  
17  
18  
19  
20  
21  
22  
23  
24  
25  
26  
27  
28  
29  
30  
31  
32  
33  
34  
35  
36  
37  
38  
39  
40  
41  
42  
43  
44  
45  
46  
47  
48  
49  
50  
51  
52  
53  
54  
55  
56  
57  
58  
59  
60

For peer review only

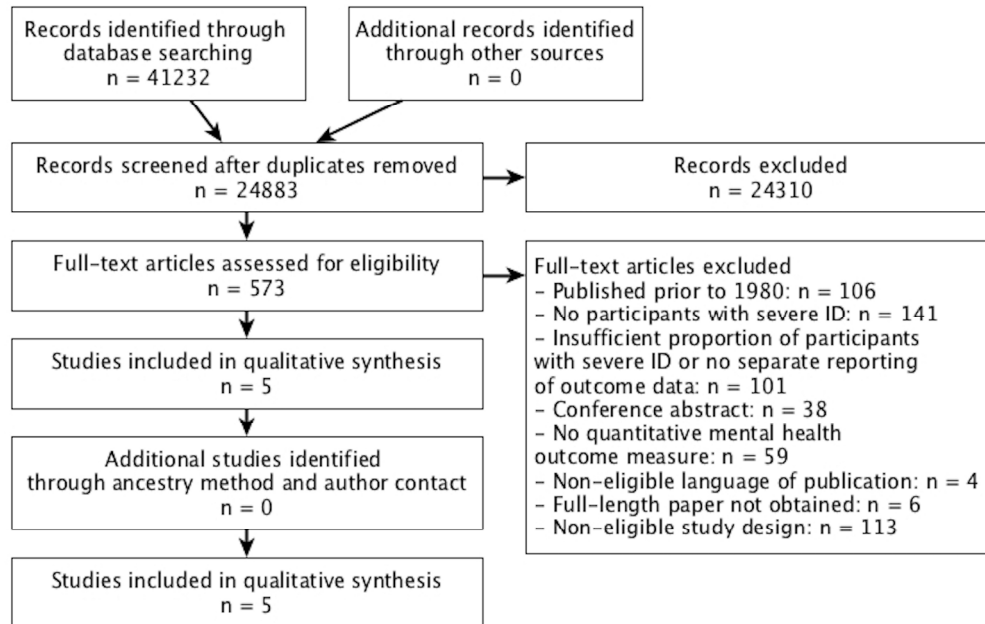

Figure 1. PRISMA Flow Diagram

244x155mm (300 x 300 DPI)

1  
2  
3 **Appendix**  
4

5 **Table 1**  
6

7 Search strategy for simultaneous database searches of PsycINFO, PsycTESTS and ASSIA using  
8  
9 ProQuest database host.  
10

| Search terms                                                                                                                                                                                                                                                                                                                                                                                                                                                                             | Results |
|------------------------------------------------------------------------------------------------------------------------------------------------------------------------------------------------------------------------------------------------------------------------------------------------------------------------------------------------------------------------------------------------------------------------------------------------------------------------------------------|---------|
| <i>Intellectual disabilities</i>                                                                                                                                                                                                                                                                                                                                                                                                                                                         |         |
| 1 SU.EXACT.EXPLODE("Intellectual Development Disorder")                                                                                                                                                                                                                                                                                                                                                                                                                                  | 37548   |
| 2 TI(mental* NEAR/3 (disab* OR impair* OR handicap* OR subnormal* OR<br>21 deficien* OR retard*)) OR AB(mental* NEAR/3 (disab* OR impair* OR<br>22 handicap* OR subnormal* OR deficien* OR retard*))                                                                                                                                                                                                                                                                                     | 38279   |
| 3 TI(learning NEAR/3 (disab* OR impair* OR difficult* OR disorder)) OR<br>27 AB(learning NEAR/3 (disab* OR impair* OR difficult* OR disorder))                                                                                                                                                                                                                                                                                                                                           | 36985   |
| 4 TI(moron OR imbecile OR feeble-minded OR subnormal OR retard) OR<br>32 AB(moron OR imbecile OR feeble-minded OR subnormal OR retard)                                                                                                                                                                                                                                                                                                                                                   | 4289    |
| 5 TI(intellect* NEAR/3 (disab* OR impair* OR handicap* OR disorder* OR<br>36 subnormal* OR deficien*)) OR AB(intellect* NEAR/3 (disab* OR impair* OR<br>37 handicap* OR disorder* OR subnormal* OR deficien*))                                                                                                                                                                                                                                                                           | 16059   |
| 6 TI((Down* OR "Smith-Magenis" OR Rett* OR "Lesch-Nyhan" OR "Prader-<br>43 Willi" OR Angelman OR "fragile X" OR "Cri-du-chat" OR "Cornelia de Lange"<br>44 OR "de Lange" OR "Rubinstein-Taybi" OR velocardiofacial) NEAR/3<br>45 syndrome*) OR AB((Down* OR "Smith-Magenis" OR Rett* OR "Lesch-<br>46 Nyhan" OR "Prader-Willi" OR Angelman OR "fragile X" OR "Cri-du-chat" OR<br>47 "Cornelia de Lange" OR "de Lange" OR "Rubinstein-Taybi" OR<br>48 velocardiofacial) NEAR/3 syndrome*) | 11067   |
| 7 OR/ 1-6                                                                                                                                                                                                                                                                                                                                                                                                                                                                                | 105392  |
| <i>Mental health</i>                                                                                                                                                                                                                                                                                                                                                                                                                                                                     |         |

|    |                                                                                                                                                                                                                                                                                                                                                                                                           |        |
|----|-----------------------------------------------------------------------------------------------------------------------------------------------------------------------------------------------------------------------------------------------------------------------------------------------------------------------------------------------------------------------------------------------------------|--------|
| 8  | SU.EXACT.EXPLODE("Depression (Emotion)")                                                                                                                                                                                                                                                                                                                                                                  | 22448  |
| 9  | SU.EXACT.EXPLODE("Anxiety Disorders") OR<br>SU.EXACT.EXPLODE("Generalized Anxiety Disorder") OR<br>SU.EXACT.EXPLODE("Anxiety") OR SU.EXACT.EXPLODE("Social<br>Anxiety")                                                                                                                                                                                                                                   | 124637 |
| 10 | TI(anger NEAR/3 (problem* OR disorder*)) OR AB(anger NEAR/3 (problem*<br>OR disorder*))                                                                                                                                                                                                                                                                                                                   | 1212   |
| 11 | TI(anxiet* OR anxious* OR gad* OR phobia* OR phobic* OR trauma* OR<br>posttraum* OR ptsd OR psychotraum*) OR AB(anxiet* OR anxious* OR gad*<br>OR phobia* OR phobic* OR trauma* OR posttraum* OR ptsd OR<br>psychotraum*)                                                                                                                                                                                 | 272855 |
| 12 | TI(mental* NEAR/2 (ill* OR disorder* OR problem* OR health* OR well*))<br>OR AB(mental* NEAR/2 (ill* OR disorder* OR problem* OR health* OR<br>well*))                                                                                                                                                                                                                                                    | 226542 |
| 13 | TI(depress* NEAR/2 (disorder* OR symptom* OR behavio* OR thought*) OR<br>depression OR affective disorder* OR emotion* NEAR/2 (disorder* OR<br>problem*) OR dysthymi* OR dysphori* OR melanchol*) OR AB(depress*<br>NEAR/2 (disorder* OR symptom* OR behavio* OR thought*) OR depression<br>OR affective disorder* OR emotion* NEAR/2 (disorder* OR problem*) OR<br>dysthymi* OR dysphori* OR melanchol*) | 273779 |
| 14 | OR/ 8-13                                                                                                                                                                                                                                                                                                                                                                                                  | 655607 |
|    | <i>Mental well-being</i>                                                                                                                                                                                                                                                                                                                                                                                  |        |
| 15 | TI(psycho* NEAR/2 function*) OR AB(psycho* NEAR/2 function*)                                                                                                                                                                                                                                                                                                                                              | 23372  |
| 16 | TI(well* OR health*)                                                                                                                                                                                                                                                                                                                                                                                      | 207285 |

|                                    |                                                                                                                                                                                                                                                                 |        |
|------------------------------------|-----------------------------------------------------------------------------------------------------------------------------------------------------------------------------------------------------------------------------------------------------------------|--------|
| 17                                 | TI((mental* OR psycholog* OR psychosoc*) NEAR/2 (health* OR well*)) OR<br>AB((mental* OR psycholog* OR psychosoc*) NEAR/2 (health* OR well*))                                                                                                                   | 193401 |
| 18                                 | TI(quality NEAR/2 life)                                                                                                                                                                                                                                         | 19555  |
| 19                                 | OR/ 15-18                                                                                                                                                                                                                                                       | 358684 |
| <i>Psychological interventions</i> |                                                                                                                                                                                                                                                                 |        |
| 20                                 | TI((psychological N/3 therap*) OR psychotherap* OR counsel*) OR<br>AB((psychological N/3 therap*) OR psychotherap* OR counsel*)                                                                                                                                 | 196693 |
| 21                                 | TI(psychoanaly* OR psychodynamic*) OR AB(psychoanaly* OR<br>psychodynamic*)                                                                                                                                                                                     | 90160  |
| 22                                 | TI((behavior* OR behaviour* OR cognitive) N/2 therap*) OR AB((behavior*<br>OR behaviour* OR cognitive) N/2 therap*)                                                                                                                                             | 39534  |
| 23                                 | TI((family OR interpersonal OR systemic OR “client centered” OR “client<br>centred” OR narrative OR relational) N/2 therap*) OR AB((family OR<br>interpersonal OR systemic OR “client centered” OR “client centred” OR<br>narrative OR relational) N/2 therap*) | 25851  |
| 24                                 | TI((supportive OR talking OR solution*focused OR emotion*focused OR non-<br>pharmacological) N/2 therap*) OR AB((supportive OR talking OR<br>solution*focused OR emotion*focused OR non-pharmacological) N/2 therap*)                                           | 1984   |
| 25                                 | TI(dialectical behavio*r therap* OR mindfulness* OR “acceptance and<br>commitment” OR “rational emotive”) OR AB(dialectical behavio*r therap* OR<br>mindfulness* OR “acceptance and commitment” OR “rational emotive”)                                          | 10630  |
| 26                                 | TI((group OR individual) N/2 therap*) OR AB((group OR individual) N/2<br>therap*)                                                                                                                                                                               | 25884  |
| 27                                 | TI(anger N/2 (manag* OR train*)) OR AB(anger N/2 (manag* OR train*))                                                                                                                                                                                            | 1612   |



|    |                                                                               |        |
|----|-------------------------------------------------------------------------------|--------|
| 1  |                                                                               |        |
| 2  |                                                                               |        |
| 3  | 28                                                                            | 17343  |
| 4  | TI((play OR art OR relax* OR music OR dance OR creative OR drama OR           |        |
| 5  | activity) N/2 therap*) OR AB((play OR art OR relax* OR music OR dance OR      |        |
| 6  | creative OR drama OR activity) N/2 therap*)                                   |        |
| 7  |                                                                               |        |
| 8  |                                                                               |        |
| 9  |                                                                               |        |
| 10 | 29                                                                            | 342375 |
| 11 | OR/ 20-28                                                                     |        |
| 12 | <i>Pharmacological interventions</i>                                          |        |
| 13 |                                                                               |        |
| 14 | 30                                                                            | 49958  |
| 15 | TI(pharmacotherapy* OR pharmacolog* OR pharmacological therap*) OR            |        |
| 16 | AB(pharmacotherapy* OR pharmacolog* OR pharmacological therap*)               |        |
| 17 |                                                                               |        |
| 18 |                                                                               |        |
| 19 | 31                                                                            | 41884  |
| 20 | TI(antipsychotic* OR anti-psychotic* OR psychotrop* OR psychopharmac*)        |        |
| 21 | OR AB(antipsychotic* OR anti-psychotic* OR psychotrop* OR                     |        |
| 22 | psychopharmac*)                                                               |        |
| 23 |                                                                               |        |
| 24 |                                                                               |        |
| 25 |                                                                               |        |
| 26 | 32                                                                            | 6622   |
| 27 | TI(atypical N/2 (antipsychotic* OR anti-psychotic* OR psychotrop*)) OR        |        |
| 28 | AB(atypical N/2 (antipsychotic* OR anti-psychotic* OR psychotrop*))           |        |
| 29 |                                                                               |        |
| 30 |                                                                               |        |
| 31 | 33                                                                            | 34457  |
| 32 | TI(tricyclic antidepressant OR anti-depress* OR antidepress*) OR AB(tricyclic |        |
| 33 | antidepressant OR anti-depress* OR antidepress*)                              |        |
| 34 |                                                                               |        |
| 35 |                                                                               |        |
| 36 | 34                                                                            | 1905   |
| 37 | TI(adrenergic blocking drugs OR monoamine oxidase inhibitors) OR              |        |
| 38 | AB(adrenergic blocking drugs OR monoamine oxidase inhibitors)                 |        |
| 39 |                                                                               |        |
| 40 |                                                                               |        |
| 41 | 35                                                                            | 7153   |
| 42 | TI(anxiolytic* OR antipanic* OR antianxiety ) OR AB(anxiolytic* OR            |        |
| 43 | antipanic* OR antianxiety )                                                   |        |
| 44 |                                                                               |        |
| 45 |                                                                               |        |
| 46 | 36                                                                            | 4142   |
| 47 | TI(anticonvulsant*) OR AB(anticonvulsant*)                                    |        |
| 48 |                                                                               |        |
| 49 |                                                                               |        |
| 50 |                                                                               |        |
| 51 |                                                                               |        |
| 52 | 37                                                                            | 12261  |
| 53 | TI(lithium*OR lithium carbonate OR SSRI* OR “selective serotonin reuptake     |        |
| 54 | inhibitor” OR serotonin reuptake inhibitor OR serotonin antagonist) OR        |        |
| 55 | AB(lithium*OR lithium carbonate OR SSRI* OR “selective serotonin reuptake     |        |
| 56 | inhibitor” OR serotonin reuptake inhibitor OR serotonin antagonist)           |        |
| 57 |                                                                               |        |
| 58 |                                                                               |        |
| 59 |                                                                               |        |
| 60 |                                                                               |        |

|    |                                                                          |        |
|----|--------------------------------------------------------------------------|--------|
| 1  |                                                                          |        |
| 2  |                                                                          |        |
| 3  | 38                                                                       | 61771  |
| 4  | TI(risperidone OR olanzapine OR clozapine* OR Leponex OR Denzapine OR    |        |
| 5  | Zaponex OR citalopram OR escitalopram OR fluoxetine OR fluvoxamine OR    |        |
| 6  | paroxetine OR sertraline OR trazodone OR clomipramine OR amoxapine OR    |        |
| 7  | isocarboxazid OR phenelzine OR tranylcypromine OR moclobemide OR         |        |
| 8  | amoxapine OR bupropion OR sulpiride OR maprotiline OR imipramine OR      |        |
| 9  | clomipramine OR desipramine OR opipramol OR doxepin OR amitriptyline OR  |        |
| 10 | lofepramine OR nortriptyline OR benzodiazepine* OR alprazolam OR         |        |
| 11 | clonazepam OR diazepam OR temazepam OR melatonin OR methylphenidate      |        |
| 12 | OR sodium valproate OR carbamazepine OR lamotrigine) OR AB(risperidone   |        |
| 13 | OR olanzapine OR clozapine* OR Leponex OR Denzapine OR Zaponex OR        |        |
| 14 | citalopram OR escitalopram OR fluoxetine OR fluvoxamine OR paroxetine OR |        |
| 15 | sertraline OR trazodone OR clomipramine OR amoxapine OR isocarboxazid OR |        |
| 16 | phenelzine OR tranylcypromine OR moclobemide OR amoxapine OR bupropion   |        |
| 17 | OR sulpiride OR maprotiline OR imipramine OR clomipramine OR desipramine |        |
| 18 | OR opipramol OR doxepin OR amitriptyline OR lofepramine OR nortriptyline |        |
| 19 | OR benzodiazepine* OR alprazolam OR clonazepam OR diazepam OR            |        |
| 20 | temazepam OR melatonin OR methylphenidate OR sodium valproate OR         |        |
| 21 | carbamazepine OR lamotrigine)                                            |        |
| 22 |                                                                          |        |
| 23 | 39                                                                       | 153952 |
| 24 | OR/ 30-38                                                                |        |
| 25 |                                                                          |        |
| 26 | <i>Final search string</i>                                               |        |
| 27 |                                                                          |        |
| 28 | 40                                                                       | 2607   |
| 29 | 7 AND (14 OR 19) AND (29 OR 39)                                          |        |
| 30 |                                                                          |        |

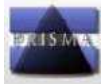

# PRISMA 2009 Checklist

| Section/topic                      | #  | Checklist item                                                                                                                                                                                                                                                                                              | Reported on page # |
|------------------------------------|----|-------------------------------------------------------------------------------------------------------------------------------------------------------------------------------------------------------------------------------------------------------------------------------------------------------------|--------------------|
| <b>TITLE</b>                       |    |                                                                                                                                                                                                                                                                                                             |                    |
| Title                              | 1  | Identify the report as a systematic review, meta-analysis, or both.                                                                                                                                                                                                                                         | 1                  |
| <b>ABSTRACT</b>                    |    |                                                                                                                                                                                                                                                                                                             |                    |
| Structured summary                 | 2  | Provide a structured summary including, as applicable: background; objectives; data sources; study eligibility criteria, participants, and interventions; study appraisal and synthesis methods; results; limitations; conclusions and implications of key findings; systematic review registration number. | 2                  |
| <b>INTRODUCTION</b>                |    |                                                                                                                                                                                                                                                                                                             |                    |
| Rationale                          | 3  | Describe the rationale for the review in the context of what is already known.                                                                                                                                                                                                                              | 6                  |
| Objectives                         | 4  | Provide an explicit statement of questions being addressed with reference to participants, interventions, comparisons, outcomes, and study design (PICOS).                                                                                                                                                  | 6                  |
| <b>METHODS</b>                     |    |                                                                                                                                                                                                                                                                                                             |                    |
| Protocol and registration          | 5  | Indicate if a review protocol exists, if and where it can be accessed (e.g., Web address), and, if available, provide registration information including registration number.                                                                                                                               | 6                  |
| Eligibility criteria               | 6  | Specify study characteristics (e.g., PICOS, length of follow-up) and report characteristics (e.g., years considered, language, publication status) used as criteria for eligibility, giving rationale.                                                                                                      | 7                  |
| Information sources                | 7  | Describe all information sources (e.g., databases with dates of coverage, contact with study authors to identify additional studies) in the search and date last searched.                                                                                                                                  | 7                  |
| Search                             | 8  | Present full electronic search strategy for at least one database, including any limits used, such that it could be repeated.                                                                                                                                                                               | Appendix           |
| Study selection                    | 9  | State the process for selecting studies (i.e., screening, eligibility, included in systematic review, and, if applicable, included in the meta-analysis).                                                                                                                                                   | 9                  |
| Data collection process            | 10 | Describe method of data extraction from reports (e.g., piloted forms, independently, in duplicate) and any processes for obtaining and confirming data from investigators.                                                                                                                                  | 10                 |
| Data items                         | 11 | List and define all variables for which data were sought (e.g., PICOS, funding sources) and any assumptions and simplifications made.                                                                                                                                                                       | 10                 |
| Risk of bias in individual studies | 12 | Describe methods used for assessing risk of bias of individual studies (including specification of whether this was done at the study or outcome level), and how this information is to be used in any data synthesis.                                                                                      | 10                 |
| Summary measures                   | 13 | State the principal summary measures (e.g., risk ratio, difference in means).                                                                                                                                                                                                                               | n/a                |
| Synthesis of results               | 14 | Describe the methods of handling data and combining results of studies, if done, including measures of consistency (e.g., $I^2$ ) for each meta-analysis.                                                                                                                                                   | n/a                |

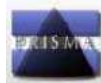

# PRISMA 2009 Checklist

Page 1 of 2

| Section/topic                 | #  | Checklist item                                                                                                                                                                                           | Reported on page # |
|-------------------------------|----|----------------------------------------------------------------------------------------------------------------------------------------------------------------------------------------------------------|--------------------|
| Risk of bias across studies   | 15 | Specify any assessment of risk of bias that may affect the cumulative evidence (e.g., publication bias, selective reporting within studies).                                                             | n/a                |
| Additional analyses           | 16 | Describe methods of additional analyses (e.g., sensitivity or subgroup analyses, meta-regression), if done, indicating which were pre-specified.                                                         | n/a                |
| <b>RESULTS</b>                |    |                                                                                                                                                                                                          |                    |
| Study selection               | 17 | Give numbers of studies screened, assessed for eligibility, and included in the review, with reasons for exclusions at each stage, ideally with a flow diagram.                                          | 10                 |
| Study characteristics         | 18 | For each study, present characteristics for which data were extracted (e.g., study size, PICOS, follow-up period) and provide the citations.                                                             | 12                 |
| Risk of bias within studies   | 19 | Present data on risk of bias of each study and, if available, any outcome level assessment (see item 12).                                                                                                | 17, 20             |
| Results of individual studies | 20 | For all outcomes considered (benefits or harms), present, for each study: (a) simple summary data for each intervention group (b) effect estimates and confidence intervals, ideally with a forest plot. | 16, 19, 20         |
| Synthesis of results          | 21 | Present results of each meta-analysis done, including confidence intervals and measures of consistency.                                                                                                  | n/a                |
| Risk of bias across studies   | 22 | Present results of any assessment of risk of bias across studies (see Item 15).                                                                                                                          | n/a                |
| Additional analysis           | 23 | Give results of additional analyses, if done (e.g., sensitivity or subgroup analyses, meta-regression [see Item 16]).                                                                                    | n/a                |
| <b>DISCUSSION</b>             |    |                                                                                                                                                                                                          |                    |
| Summary of evidence           | 24 | Summarize the main findings including the strength of evidence for each main outcome; consider their relevance to key groups (e.g., healthcare providers, users, and policy makers).                     | 22-23              |
| Limitations                   | 25 | Discuss limitations at study and outcome level (e.g., risk of bias), and at review-level (e.g., incomplete retrieval of identified research, reporting bias).                                            | 24                 |
| Conclusions                   | 26 | Provide a general interpretation of the results in the context of other evidence, and implications for future research.                                                                                  | 25                 |
| <b>FUNDING</b>                |    |                                                                                                                                                                                                          |                    |
| Funding                       | 27 | Describe sources of funding for the systematic review and other support (e.g., supply of data); role of funders for the systematic review.                                                               | 27                 |

From: Moher D, Liberati A, Tetzlaff J, Altman DG, The PRISMA Group (2009). Preferred Reporting Items for Systematic Reviews and Meta-Analyses: The PRISMA Statement. PLoS Med 6(7): e1000097. doi:10.1371/journal.pmed1000097

For more information, visit: [www.prisma-statement.org](http://www.prisma-statement.org).

Page 2 of 2

For peer review only - <http://bmjopen.bmj.com/site/about/guidelines.xhtml>

# BMJ Open

## Interventions for mental health problems in children and adults with severe intellectual disabilities: A systematic review

|                                 |                                                                                                                                                                                                                                                                                                                                                                                                                                                                                                                                                                                                                                                                                                                                                                                                                                                                                                                                                                                  |
|---------------------------------|----------------------------------------------------------------------------------------------------------------------------------------------------------------------------------------------------------------------------------------------------------------------------------------------------------------------------------------------------------------------------------------------------------------------------------------------------------------------------------------------------------------------------------------------------------------------------------------------------------------------------------------------------------------------------------------------------------------------------------------------------------------------------------------------------------------------------------------------------------------------------------------------------------------------------------------------------------------------------------|
| Journal:                        | <i>BMJ Open</i>                                                                                                                                                                                                                                                                                                                                                                                                                                                                                                                                                                                                                                                                                                                                                                                                                                                                                                                                                                  |
| Manuscript ID                   | bmjopen-2018-021911.R2                                                                                                                                                                                                                                                                                                                                                                                                                                                                                                                                                                                                                                                                                                                                                                                                                                                                                                                                                           |
| Article Type:                   | Research                                                                                                                                                                                                                                                                                                                                                                                                                                                                                                                                                                                                                                                                                                                                                                                                                                                                                                                                                                         |
| Date Submitted by the Author:   | 23-Apr-2018                                                                                                                                                                                                                                                                                                                                                                                                                                                                                                                                                                                                                                                                                                                                                                                                                                                                                                                                                                      |
| Complete List of Authors:       | Vereenooghe, Leen; Bielefeld University, Faculty of Psychology and Sports Science<br>Flynn, Samantha; University of Warwick, Centre for Educational Development, Appraisal and Research<br>Hastings, Richard; University of Warwick,<br>Adams, Dawn; Griffith University, Autism Centre of Excellence<br>Chauhan, Umesh; University of Central Lancashire, School of Health<br>Cooper, Sally-Ann; Glasgow University , Institute of Health and Wellbeing<br>Gore, Nick; University of Kent, Tizard Centre<br>Hatton, Chris; Lancaster University<br>Hood, Kerenza<br>Jahoda, Andrew; University of Glasgow, Institute of Health and Wellbeing<br>Langdon, PE; Tizard Centre, University of Kent<br>McNamara, Rachel; Cardiff University, Centre for Trials Research<br>Oliver, Chris; University of Birmingham, School of Psychology<br>Roy, Ashok; Coventry and Warwickshire Partnership NHS Trust<br>Totsika, Vasiliki; University of Warwick<br>Waite, Jane; Aston University |
| <b>Primary Subject Heading</b>: | Mental health                                                                                                                                                                                                                                                                                                                                                                                                                                                                                                                                                                                                                                                                                                                                                                                                                                                                                                                                                                    |
| Secondary Subject Heading:      | Pharmacology and therapeutics                                                                                                                                                                                                                                                                                                                                                                                                                                                                                                                                                                                                                                                                                                                                                                                                                                                                                                                                                    |
| Keywords:                       | MENTAL HEALTH, intellectual disabilities, systematic review, psychological therapies, pharmacotherapies                                                                                                                                                                                                                                                                                                                                                                                                                                                                                                                                                                                                                                                                                                                                                                                                                                                                          |
|                                 |                                                                                                                                                                                                                                                                                                                                                                                                                                                                                                                                                                                                                                                                                                                                                                                                                                                                                                                                                                                  |

SCHOLARONE™  
Manuscripts

**Interventions for mental health problems in children and adults with severe intellectual disabilities: A systematic review.**

Dr Leen Vereenooghe<sup>1</sup>, Ms Samantha Flynn<sup>2</sup>, Prof. Richard P Hastings<sup>2,3</sup>, Dr Dawn Adams<sup>4</sup>, Dr Umesh Chauhan<sup>5</sup>, Prof. Sally-Ann Cooper<sup>6</sup>, Dr Nick Gore<sup>7</sup>, Prof. Chris Hatton<sup>8</sup>, Prof. Kerry Hood<sup>9</sup>, Prof. Andrew Jahoda<sup>6</sup>, Prof Dr Peter E Langdon<sup>7</sup>, Dr Rachel McNamara<sup>9</sup>, Prof. Chris Oliver<sup>10</sup>, Dr Ashok Roy<sup>11</sup>, Dr Vasiliki Totsika<sup>3, 12</sup> and Dr Jane Waite<sup>13</sup>

<sup>1</sup> Faculty of Psychology and Sports Science, Bielefeld University, Germany

<sup>2</sup> CEDAR, University of Warwick, UK

<sup>3</sup> Centre for Developmental Psychiatry and Psychology, Department of Psychiatry, School of Clinical Sciences at Monash Health, Monash University

<sup>4</sup> Autism Centre of Excellence, Griffith University, Brisbane, Australia

<sup>5</sup> Mackenzie Chair in Primary Care Medicine, School of Medicine, University of Central Lancashire; UK

<sup>6</sup> Institute of Health and Wellbeing, University of Glasgow, UK

<sup>7</sup> Tizard Centre, University of Kent, Canterbury, UK

<sup>8</sup> Faculty of Health and Medicine, Lancaster University, UK

<sup>9</sup> Centre for Trials Research, Cardiff University, UK

<sup>10</sup> School of Psychology, University of Birmingham, UK

<sup>11</sup> Coventry and Warwickshire Partnership NHS Trust, UK

<sup>12</sup> CES, University of Warwick, UK

<sup>13</sup> School of Life & Health Sciences, Aston University, UK

**Correspondence should be addressed to:**

Junior Professor Dr Leen Vereenooghe, Department of Psychology, Faculty of Psychology and Sports Science, Bielefeld University, PO Box 10 01 31, D-33501 Bielefeld, Germany. Email address: leen.vereenoooghe@uni-bielefeld.de. Telephone: +49 (0)521-106 67521.

**Word count:** 4483

## ABSTRACT

**Objective:** Mental health problems are more prevalent in people with than without intellectual disabilities, yet treatments options have received little attention. The aim of this study was to identify and evaluate the effectiveness of pharmacological and psychological interventions in the treatment of mental health problems in children and adults with severe and profound intellectual disabilities, given their difficulties in accessing standard mental health interventions, particularly talking-therapies, and difficulties reporting drug side-effects.

**Design:** A systematic review using electronic searches of PsycINFO, PsycTESTS, EMBASE, MEDLINE, CINAHL, ERIC, ASSIA, Science Citation Index, Social Science Citation Index, and CENTRAL was conducted to identify eligible intervention studies. Study selection, data extraction and quality appraisal were performed by two independent reviewers.

**Participants:** Study samples included at least 70 % children and/or adults with severe or profound intellectual disabilities or reported the outcomes of this subpopulation separate from participants with other levels of intellectual disabilities.

**Interventions:** Eligible intervention studies evaluated a psychological or pharmacological intervention using a control condition.

**Outcomes:** Symptom severity, frequency or other quantitative dimension (e.g., impact), as assessed with standardised measures of mental health problems.

**Results:** We retrieved 41,232 records, reviewed 573 full-text articles and identified 5 studies eligible for inclusion: 3 studies evaluating pharmacological interventions, and 2 studies evaluating psychological interventions. Study designs ranged from double-blind placebo-controlled crossover trials to single-case experimental reversal designs. Quality appraisals of this very limited literature base revealed good experimental control, poor reporting standards, and a lack of follow-up data.

**Conclusions:** Mental ill-health requires vigorous treatment, yet the current evidence base is too limited to identify with precision effective treatments specifically for children or adults with severe and profound intellectual disabilities. Clinicians therefore must work on the basis of general population evidence, whilst researchers work to generate more precise evidence for people with severe and profound intellectual disabilities.

1  
2  
3  
4  
5  
6  
7  
8  
9  
10  
11  
12  
13  
14  
15  
16  
17  
18  
19  
20  
21  
22  
23  
24  
25  
26  
27  
28  
29  
30  
31  
32  
33  
34  
35  
36  
37  
38  
39  
40  
41  
42  
43  
44  
45  
46  
47  
48  
49  
50  
51  
52  
53  
54  
55  
56  
57  
58  
59  
60

**PROSPERO registration number** CRD 42015024469

**Keywords:** intellectual disability, mental health, systematic review, psychological therapies, pharmacotherapies

For peer review only



### Strengths and limitations of this study

- To our knowledge this is the first systematic review focused on interventions to improve the mental health of both children and adults with severe and profound intellectual disabilities.
- Review eligibility was not restricted to randomised controlled trials which limits the strength of the review's findings.
- The body of evidence we identified was very slim and does not allow for generalisation of findings for either psychological or pharmacological interventions.

## INTRODUCTION

Intellectual disabilities affect approximately 1 percent of the population and are characterised by significantly impaired intellectual and adaptive skills with onset before adulthood. Their prevalence of mental health problems has been reported to be more than seven times higher than for the general population [1]. People with severe and profound intellectual disabilities, as indicated by an intelligence quotient of less than 40, have limitations in problem-solving skills, cognitive and communication skills which can affect their ability to cope with stressful life events. The life circumstances of people with an intellectual disability may increase their risk of developing mental health problems or experiencing mental distress. Factors that have been identified as protective in adults without intellectual disabilities, such as employment opportunities, meaningful day activities and socially supportive networks, may be less likely to be present for people with intellectual disabilities and with additional impact for those with severe and profound intellectual disabilities compared to those with mild or moderate intellectual disabilities [2–4]. Genetic factors may further increase the vulnerability of some people with intellectual disabilities for mental health problems, as evidenced by significant comorbidity rates of anxiety problems and psychosis in people with intellectual disabilities and certain genetic syndromes [5–9].

Mental health problems are as common in people with severe and profound intellectual disabilities as in people with mild or moderate intellectual disabilities, reported to have a point prevalence of 22.4% [10–14]. Their treatment of mental health problems requires particular attention for three main reasons. First, longitudinal research investigating the mental health of children and young people with intellectual disabilities over a 14 year period suggest recovery may be poorer for those with severe intellectual disabilities, and therefore standard treatments may be sub-optimal [10–12]. Second, given their limitations in communication skills and understanding, people with severe and profound intellectual disabilities cannot be assumed to find talking therapies such as CBT-based interventions as accessible as other people do; yet these therapies are considered first line treatments of choice for many types of mental health problems. Third, it is possible that people with intellectual disabilities are more sensitive to the side effects of pharmacotherapies, or have greater difficulties in reporting side-effects when these occur, so raising the potential of more serious consequences, and the

1  
2  
3 need for different dosing regimes compared with other people. The high prevalence and potentially  
4 persistent mental health problems experienced by people with severe and profound intellectual  
5 disabilities thus call for effective interventions to treat such problems and to promote well-being.  
6  
7

8 Existing systematic reviews have evaluated either the psychological or pharmacological  
9 treatment of mental health problems in people with intellectual disabilities. Cognitive behavioural  
10 therapies (CBT) were found to have moderate positive treatment effects for people with intellectual  
11 disabilities who experience anger problems, anxiety and depression [15–17], but these findings are  
12 limited to adults with mild to moderate intellectual disabilities, however, as children or individuals  
13 with severe and profound intellectual disabilities were not represented in the primary studies. Reviews  
14 of pharmacological interventions have largely focused on behaviour problems independent of their  
15 association with mental health problems. For example, potentially effective interventions for  
16 behaviour problems in adults with intellectual disabilities include risperidone, lithium and anti-  
17 epileptic mood stabilisers [18,19]. However, the methodological quality of the evidence and  
18 registered adverse effects indicate that the use of these pharmacological agents requires caution  
19 [18,19]. Whilst behaviour problems can be associated with mental health problems and take on a  
20 precipitating or perpetuating role, they are more indicative of emotional dysregulation than of  
21 psychiatric symptomatology, and have been demonstrated in robust studies to be distinct from other  
22 types of mental health problems [20]. We have not identified reviews on treatment response and side-  
23 effects to pharmacotherapies for other types of mental health problems experienced by people with  
24 severe and profound intellectual disabilities. The objective of the present systematic review was to  
25 evaluate the effectiveness of psychological and pharmacological treatments for mental health  
26 problems and their key symptoms in both children and adults with severe or profound intellectual  
27 disabilities.  
28  
29  
30  
31  
32  
33  
34  
35  
36  
37  
38  
39  
40  
41  
42  
43  
44  
45  
46  
47

## 48 **METHODS**

49  
50 The review was conducted and written in accordance with the Preferred Reporting Items for  
51 Systematic Reviews and Meta-Analyses statement [21]. The review protocol was registered with  
52 PROSPERO, Centre for Reviews and Dissemination, under the reference number CRD 42015024469.  
53  
54  
55  
56  
57  
58  
59  
60

### Search strategy

The search strategy was developed for two conjoint systematic reviews focused on the evaluation of measures of mental health problems and interventions respectively in people with severe and profound intellectual disabilities. Although separate search terms were used for each systematic review, records identified through the respective searches were pooled together prior to the study eligibility screening to ensure that studies piloting an assessment as an intervention outcome measure would also be identified.

Initial systematic searches were conducted in the week of 13 to 17 July 2015 for the following databases: PsycINFO, PsycTESTS, EMBASE, MEDLINE, CINAHL, ERIC, ASSIA, Science Citation Index, Social Science Citation Index, Cochrane Central Register of Controlled Trials (CENTRAL). Searches used Boolean terms to combine search strings for intellectual disabilities, mental health, and psychological or pharmacological interventions. Instead of listing all potential diagnosis and treatments the search strategy included the most common diagnoses and treatments in conjunction with more general mental health descriptions. This approach could limit the initial records to be screened, whereas relevant studies could still be identified through the ancestry method which screens citing and cited articles of included studies and through contact with authors. A sample search strategy for the PsycINFO, PsycTESTS and ASSIA searches is provided in the appendix. Full search strategies for each database can be requested from the authors.

Searches were updated in September 2017, to cover the time period from the original searches, and no new studies were identified from these searches. The updated searches followed the same search strategy and study screening protocol as the original searches.

### Study eligibility criteria

The following inclusion criteria were applied to (1) publication type, (2) study design, (3) participants, (4) interventions, and (5) outcomes.

(1) *Publication.* Peer-reviewed publications written in English, French, German or Dutch were eligible for review.

(2) *Study design.* The following study designs were eligible for inclusion in the review: (a) randomised controlled trials, (b) controlled trials without randomisation, (c) single group pre-post

1  
2  
3 designs, (d) case series with outcome measures reported as group mean data, (e) single-case  
4 experimental designs, and (f) case-control studies. Observational and retrospective cohort studies, as  
5 well as case studies without a control condition or a return to baseline were excluded.  
6  
7

8  
9 (3) *Participants*. To ensure that the outcome data were representative for people with severe  
10 and profound intellectual disabilities it was required that either a minimum of 70% of participants  
11 were diagnosed or reported as having severe or profound intellectual disabilities, or that data for  
12 participants with severe or profound intellectual disabilities were reported separately in the study.  
13  
14 Although this was an arbitrary criterion, this was to ensure that a majority of people with severe or  
15 profound intellectual disabilities were in the study samples. Studies that did not provide any usable  
16 information about the level of intellectual disabilities within samples were excluded. No exclusions  
17 were applied concerning participants' age or gender or any other characteristics except for degree of  
18 intellectual disability.  
19  
20  
21  
22  
23  
24  
25

26  
27 (4) *Intervention*. Eligible psychological interventions were delivered by a trained lay therapist  
28 or qualified professional who systematically applied interventions based on well-established  
29 psychological principles and techniques directly to the person with an intellectual disability, either  
30 individually or in a group. For pharmacological interventions, it was expected that the pharmaceutical  
31 agent was given with regular review by a qualified medical practitioner or health professional, and  
32 recognised at least in principle as a potential treatment for a mental health problem/symptom.  
33  
34  
35  
36  
37

38  
39 (5) *Outcomes*. Eligible outcomes were standardised assessments of mental disorders or their  
40 key symptoms which have a significant impact on daily functioning. However, we acknowledge that  
41 defining the mental and physical components of mental and physical disorders into mutually exclusive  
42 categories can be challenging, not in the least because certain components are symptomatic of multiple  
43 disorders and certain disorders have shown high rates of co-morbidity with one another. For the  
44 purpose of this systematic review, the inclusion criteria for mental disorders and their symptoms were  
45 derived from the DSM-IV [22], as this version was most likely to be used by the primary studies to be  
46 identified by the systematic review. Mental and behavioural disorders, and their key symptoms,  
47 eligible for review fell within the following classifications: (a) attention-deficit and disruptive  
48 behaviour disorders, (b) tic disorders, (c) other disorders of infancy, childhood, or adolescence, (d)  
49  
50  
51  
52  
53  
54  
55  
56  
57  
58  
59  
60

1  
2  
3 schizophrenia and other psychotic disorders, (e) mood disorders, (f) anxiety disorders, (g) somatoform  
4 disorders, (h) factitious disorders, (i) dissociative disorders, (j) eating disorders, (k) adjustment  
5 disorders, and (l) personality disorders.  
6

7  
8 Studies focused on key symptoms of mental disorders were included as not all treatment offers a  
9 holistic approach, and interventions may instead aim to alleviate one or more symptoms of a disorder.  
10  
11 By contrast, challenging behaviours and behaviour problems may be associated with or indicative of  
12 underlying mental disorders [20,23] but are not recognised as a key diagnostic feature of the above  
13 listed mental disorders and are hence excluded from this review.  
14  
15  
16  
17

18 The broad scope of the systematic review in terms of study designs, type of interventions and  
19 range of participants was advised as initial scoping searches indicated that only few studies included  
20 individuals with severe and profound intellectual disabilities.  
21  
22  
23

24 A single post-hoc exclusion criterion was applied to exclude records from the searches  
25 published prior to 1980 (n=106 records, but not fully checked for inclusion criteria), coinciding with  
26 the publication of the third edition of the Diagnostic and Statistical Manual of Mental Disorders  
27 (DSM-III); [24]. This assured a minimal level of consistency in the recognition and diagnosis of  
28 mental health problems from DSM-III through to DSM-IV. It is likely that there would have been a  
29 delay between the publication of the DSM-III and its first use in published research, but searches back  
30 to 1980 were essential to ensure that no potentially relevant studies were missed.  
31  
32  
33  
34  
35  
36  
37

### 38 **Study selection**

39  
40 Data collection and abstract screening were performed by the first author (LV). Twenty  
41 percent of records were also screened by the second author (SF), leading to an overall agreement rate  
42 of 99.8 % and a Kappa coefficient of 0.91 for studies to proceed to full text evaluation. Second  
43 screening a proportion of results is an accepted practice when a review is large and resources are  
44 limited [25]. The overall inclusion rate for the screening of titles and abstracts was 2.3 %. Full-text  
45 review of 573 articles was performed independently by the two reviewers (LV and SF), which resulted  
46 in a Kappa coefficient of 0.76 for inclusion in the review and the data extraction stage. Eleven  
47 disagreements between the two reviewers were resolved through joint discussion. All disagreements  
48 concerned the proportion of participants with severe and profound intellectual disabilities and were  
49  
50  
51  
52  
53  
54  
55  
56  
57  
58  
59  
60

1  
2  
3 not related to study design, intervention or outcomes. The review of one full text article required  
4 consultation with the third author (RH) to determine whether this study met the review eligibility  
5 criteria regarding mental health outcomes. Upon discussion, the paper was excluded from the review.  
6  
7

8  
9 Next, reference lists and citation records of all included studies were screened to identify  
10 additional papers that may not have fulfilled the search term criteria. No additional studies were  
11 identified in this way.  
12  
13

#### 14 **Data extraction and quality synthesis**

15  
16 Data extraction was conducted by the second author and reviewed by the first author for  
17 variables including: study design, study population, intervention, outcome measures, and follow-up  
18 data.  
19  
20  
21

22  
23 The certainty in the evidence for each outcome measure could not be assessed with the  
24 GRADE approach [26–28], as used by the Cochrane collaboration and national guideline  
25 organisations such as NICE in the UK, due to the incomparability of identified studies in terms of  
26 study design, interventions, and outcomes. Likewise, it was not possible to conduct a meta-analysis or  
27 provide other summary measures because no two studies addressed the same mental health problem  
28 using a similar intervention.  
29  
30  
31  
32  
33

34 Both reviewers independently performed a critical appraisal of all included studies. No  
35 disagreements were recorded at either stage. The assessment followed the Critical Appraisal Skills  
36 Programme [29,30] checklists or the quality indicators for within single-subjects research [31],  
37 dependent on the study design.  
38  
39  
40  
41

#### 42 **Patient and public involvement**

43  
44 Patients and public were not involved in the conception, development or implementation of  
45 this systematic review, nor in the selection of outcome measures and the interpretation of the study  
46 findings.  
47  
48  
49

## 50 **RESULTS**

51  
52 The search strategy for the conjoint systematic review identified 24,883 unique records, of  
53 which 573 were retained for full-text eligibility screening. The study selection process is illustrated in  
54 Figure 1. Excluded articles most commonly did not meet the eligibility criteria concerning the severity  
55  
56  
57  
58  
59

1  
2  
3 of intellectual disabilities of study participants (n = 242). Initial records were also excluded based on  
4 their study design (n = 113), a publication date prior to 1980 (n = 106), because the intervention or  
5 outcomes were not focused on recognised mental health problems (n = 59), due to their publication  
6 status (e.g. conference abstracts; n = 38), or because the full-text paper could either not be retrieved (n  
7 = 6) or was published in a non-eligible language (n = 4). In total, five studies were included in the  
8 review and are described in Table 1. Three studies included only adults with intellectual disabilities: a  
9 double-blind placebo-controlled crossover trial [32] and a single-case experimental reversal design of  
10 pharmacotherapy [33], as well as a single-case experimental reversal design of a psychological  
11 intervention [34]. Two studies included children and young people: a randomised trial of  
12 pharmacotherapy by White and Aman [35] and a single-case study of a psychological intervention for  
13 a 13-year old girl [36].  
14  
15  
16  
17  
18  
19  
20  
21  
22  
23  
24  
25

26 [Figure 1 about here]  
27  
28  
29  
30  
31  
32  
33  
34  
35  
36  
37  
38  
39  
40  
41  
42  
43  
44  
45  
46  
47  
48  
49  
50  
51  
52  
53  
54  
55  
56  
57  
58  
59  
60



**Table 1**

Characteristics of pharmacological and psychological interventions studies.

| First author<br>(Year)                     | Study Design <sup>a</sup>                        | Participants                                                                                                     | Intervention                                                                                                                    | Outcomes                                                                                                                                                                                   | Follow-up                                                                                                             |
|--------------------------------------------|--------------------------------------------------|------------------------------------------------------------------------------------------------------------------|---------------------------------------------------------------------------------------------------------------------------------|--------------------------------------------------------------------------------------------------------------------------------------------------------------------------------------------|-----------------------------------------------------------------------------------------------------------------------|
| <i>Psychopharmacological interventions</i> |                                                  |                                                                                                                  |                                                                                                                                 |                                                                                                                                                                                            |                                                                                                                       |
| Aman (1986)                                | Double-blind placebo-controlled crossover trial  | Adults with depressive and affective symptoms<br>N = 5 (2M/3F)                                                   | Imipramine (Dumex) or placebo<br>Duration: 4W                                                                                   | Imipramine caused symptom deterioration for ABC <sup>c</sup> scores related to irritability, lethargy, and hyperactivity.                                                                  | No follow-up                                                                                                          |
|                                            | Within-group randomisation                       | Age range: 18 – 23 years<br>intellectual disabilities                                                            | Dose:<br>3 mg/kg/day                                                                                                            | No intervention effects were observed for: stereotypy and inappropriate speech.                                                                                                            |                                                                                                                       |
|                                            | I1: Imipramine<br>I2: placebo                    | severity: Slosson IQ <sup>b</sup><br>range 10 -14                                                                | Setting: residential ward                                                                                                       |                                                                                                                                                                                            |                                                                                                                       |
|                                            | 1-week washout period between interventions      |                                                                                                                  |                                                                                                                                 | Statistical data only provided for analyses including a second intervention group, non-eligible for review.                                                                                |                                                                                                                       |
| Rosenquist (1997)                          | Single-case experimental reversal design (ABABA) | Adult with Gilles de la Tourette syndrome<br>N = 1, Female<br>Age = 35 years<br>Severe intellectual disabilities | Haloperidol<br>Duration: 22W,<br>A: 2W baseline<br>B: 8W intervention<br>A: 2W baseline<br>B: 8W intervention<br>A: 2W baseline | Weekly observations using Behavioral Observation and Tic Checklist <sup>d</sup> of 3 videotaped conditions: (1) table setting task, (2) mealtime, and (3) waiting.<br>Pre-post % time (SD) | W6 of increased dosage<br>% time (SD) engaged in tic behavior at W6 (dose 10 mg/day):<br>Mealtime:<br>SM-tic: 6.3 (6) |
|                                            | A, Baseline<br>B, Haloperidol                    |                                                                                                                  |                                                                                                                                 |                                                                                                                                                                                            |                                                                                                                       |
|                                            | Single blind, masked                             |                                                                                                                  |                                                                                                                                 |                                                                                                                                                                                            |                                                                                                                       |

1  
2  
3  
4  
5  
6  
7  
8  
9  
10  
11  
12  
13  
14  
15  
16  
17  
18  
19  
20  
21  
22  
23  
24  
25  
26  
27  
28  
29  
30  
31  
32  
33  
34  
35  
36  
37  
38  
39  
40  
41  
42  
43  
44  
45  
46  
47

|              |                                                                                                                             |                                                                                                                                                                                                       |                                                                                                                                      |                                                                                                                                                                                                                                                                                                                                                     |                                                                                                                                                                                                                    |
|--------------|-----------------------------------------------------------------------------------------------------------------------------|-------------------------------------------------------------------------------------------------------------------------------------------------------------------------------------------------------|--------------------------------------------------------------------------------------------------------------------------------------|-----------------------------------------------------------------------------------------------------------------------------------------------------------------------------------------------------------------------------------------------------------------------------------------------------------------------------------------------------|--------------------------------------------------------------------------------------------------------------------------------------------------------------------------------------------------------------------|
|              | assessment                                                                                                                  |                                                                                                                                                                                                       | Dose:<br>-W1: 1 mg/day<br>-W2: 2mg/day<br>-W3-4: 5 mg/day<br>-W5-6: 10 mg/day<br>-W7-8: washout<br><br>Setting: community group home | engaged in tic behavior at baseline and W1 (dose 1mg/day):<br><br>Mealtime:<br>SM-tic: 34.8 (20); 11.0 (12)<br>CM-tic: 13.6 (10); 5.3 (8)<br>SV-tic: 35.4 (28); 2.0 (4)<br>CV-tic: 1.3 (3); 0.0 (0)<br><br>Waiting:<br>SM-tic: 46.8 (31); 20.8 (26)<br>CM-tic: 41.2 (19); 25.3 (21)<br>SV-tic: 65.3 (29); 69.6 (25)<br>CV-tic: 42.5 (18); 23.0 (18) | CM-tic: 3.0 (3)<br>SV-tic: 1.0 (3)<br>CV-tic: 1.0 (2)<br><br>Waiting:<br>SM-tic: 24.7 (20)<br>CM-tic: 41.5 (18)<br>SV-tic: 48.4 (26)<br>CV-tic: 34.8 (20)<br><br>Dose-specific improvements (10mg/day), reversible |
| White (1985) | Double-blind placebo-controlled crossover trial<br><br>I1: Pimozide<br>I2: Placebo<br><br>Randomisation within participants | Inpatients with serious behaviour disturbances, including hyperactivity<br><br>N = 8, 7M/1F<br>Mean age 15.7 years (SD = 3.42)<br>intellectual disabilities severity: moderate to profound; mean IQ = | Pimozide or placebo<br><br>Baseline: 4W<br>Intervention: 4W + 4W<br><br>Dose:<br>I1: 6 mg/day<br>Setting: no info                    | ANCOVA for drug effects and baseline as covariate on ABC subscales<br><br>Pimozide has an effect:<br>Irritability: F = 11.78<br>Hyperactivity: F = 7.69<br><br>No significant effects                                                                                                                                                               | No follow-up                                                                                                                                                                                                       |

|                  |                                                   |                                                                                                                                                        |                                                                                                                                                                                                                                                                |                                                                                                                                                                                                                                                                                                                       |              |
|------------------|---------------------------------------------------|--------------------------------------------------------------------------------------------------------------------------------------------------------|----------------------------------------------------------------------------------------------------------------------------------------------------------------------------------------------------------------------------------------------------------------|-----------------------------------------------------------------------------------------------------------------------------------------------------------------------------------------------------------------------------------------------------------------------------------------------------------------------|--------------|
|                  | 1-week washout period between interventions       | 20.4 (SD = 12.11)                                                                                                                                      |                                                                                                                                                                                                                                                                | for:<br>Lethargy: F = 0.84<br>Stereotypy: F = 3.48<br>Inappropriate speech: F = 1.31                                                                                                                                                                                                                                  |              |
|                  | <i>Psychological interventions</i>                |                                                                                                                                                        |                                                                                                                                                                                                                                                                |                                                                                                                                                                                                                                                                                                                       |              |
| Lindauer (1999)  | Single-case experimental reversal design (ABAB)   | Mood disorder, major depression<br>N = 1, Female<br>Age = 23 years<br>Severe intellectual disabilities                                                 | Enriched environment: 12 items selected for inclusion by paired-choice assessment<br><br>Duration: 57 sessions;<br>A: 11 sessions<br>B: 5 sessions<br>A: 29 sessions<br>B: 12 sessions<br><br>Dose: 10 minute sessions<br><br>Setting: Laboratory, padded room | Percentage of 10-s intervals of signs of negative and positive affect<br><br>Pre: relatively high levels of negative affect (M = 27.4%) and low levels of positive affect (M = 2.3%)<br><br>Post: negative affect decreased (M = 0.1%) and positive affect increased, especially during B2 (M = 11.5% across phases). | No follow-up |
| Zarkowska (1989) | 2 Single-case experimental reversal designs (ABA) | Gilles de la Tourette syndrome<br>N = 1, Female<br>Age = 13 years<br>Severe intellectual disabilities (Griffiths Mental Development Scale score ranged | I1: verbal instructions for relaxation exercises and praise when calm<br>Duration: 10 minutes<br><br>I2: verbal interruption following the occurrence of a verbal tic                                                                                          | I1 reduced tic frequency during relaxation but return to baseline after intervention<br><br>I2 increased vocal tic frequency.                                                                                                                                                                                         | No follow-up |

1  
2  
3  
4  
5  
6  
7  
8  
9  
10  
11  
12  
13  
14  
15  
16  
17  
18  
19  
20  
21  
22  
23  
24  
25  
26  
27  
28  
29  
30  
31  
32  
33  
34  
35  
36  
37  
38  
39  
40  
41  
42  
43  
44  
45  
46  
47

---

|                                                      |                       |                      |                                                            |
|------------------------------------------------------|-----------------------|----------------------|------------------------------------------------------------|
| school activity, tics ignored                        | from 17 to 42 months) | Duration: 10 minutes | After I1 and I2: No generalised reduction in tic frequency |
| I2: interruption                                     |                       |                      |                                                            |
| A, Baseline: school activity, tics ignored           |                       |                      |                                                            |
| B, interruption                                      |                       |                      |                                                            |
| A, Baseline: return to school activity, tics ignored |                       |                      |                                                            |

---

*Note.* I1, intervention 1; I2, intervention 2; G1, group 1; G2, group 2; Gender ratio expressed as Male/Female; W1, week 1; SD, standard deviation. Outcomes reported for primary outcome measure only, unless where mental health or mental well-being outcome measure were recorded as secondary outcome measures.

<sup>a</sup> AB designs with A: baseline and B: treatment.

<sup>b</sup> Slosson IQ scores correlate highly with Stanford Binet Intelligence Test scores and correlate with the Cattell Infant Intelligence Scale when used with children under the age of 2 (Slosson, 1975).

<sup>c</sup> ABC, Aberrant Behavior Checklist.

<sup>d</sup> SM-tic, simple motor tic; CM-tic, complex motor tic; SV-tic, simple vocal tic; CV-tic, complex vocal tic.

## Psychological interventions

Two studies evaluated interventions based on psychological principles. Interventions were offered for symptoms of depressive disorder and to manage tic frequency in Gilles de la Tourette syndrome.

In a single-case experimental ABAB design, Lindauer and colleagues [34] offered an enriched environment for the management of major depressive disorder in a 23-year old woman with severe intellectual disabilities who also presented with self-injurious behaviour. Pre-existing treatment of the mood disorder with carbamazepine (5.3 mg/kg/day) was continued during the study. The enriched environment setting was a 3 metre by 3 metre padded room, in an inpatient unit, in which stimuli were present that were chosen following a paired-choice assessment to identify the woman's preferred stimuli and assess signs of positive and negative affect. Smiling, giggling and laughing were considered examples of positive 'affect', whereas frowning, whining, crying and verbal expressions such as "I am sad" were identified as signs of negative 'affect'. No other outcome measures relating to the mood disorder were employed. Behavioural observations, through a one-way mirror, showed that the enriched environment increased signs of positive affect and decreased signs of negative affect, in particular during the second intervention phase. The lack of follow-up measures and the delivery of interventions in a padded room in an inpatient setting reduce the ecological validity of this intervention. Likewise, the replicability of findings is impeded in terms of participant selection and intervention fidelity (see Table 2).

Zarkowska et al. [36] adopted a basic single-case experimental design to examine interventions for vocal and motor tics in a 13-year old girl with Gilles de la Tourette syndrome and severe intellectual disabilities. Two treatment probes, cued relaxation and interruption, were evaluated using an ABA return to baseline design for each intervention comprised of a five minute baseline recording, a five minute intervention, and a five minute post-baseline recording. Cued relaxation appeared to lead to better outcomes but neither intervention had lasting effects and interruption increased vocal tic frequency. The study design showed strong external and social validity and provided clear descriptions of dependent and independent variables (see Table 2). However, internal

validity was weak and the ABA design was not the most suitable for demonstrating experimental control. Following the evaluation of treatment probes, the study continued as an A-B case study implementing successive interventions of relaxation training, treatment with clonidine and treatment with pimozide. Due to the non-controlled nature of these interventions, their respective outcome data and follow-up data were not considered eligible for inclusion in this review.

The replicability of findings from both studies is hindered by a lack of information regarding participant selection, physical setting of the intervention, implementation fidelity, and the reliability of outcome measurements.

**Table 2**

Quality appraisal of single-subject studies using the Quality Indicators Within Single-Subject Research [31].

| Quality indicator                                          | Lindauer et al. (1999) | Rosenquist et al. (1997) | Zarkowska (1989) |
|------------------------------------------------------------|------------------------|--------------------------|------------------|
| <i>Participant description and setting</i>                 |                        |                          |                  |
| Ability to select individuals with similar characteristics | yes                    | yes                      | yes              |
| Replicability of participant selection process             | no                     | no                       | no               |
| Replicability of physical setting                          | yes                    | yes                      | partial          |
| <i>Dependent variable</i>                                  |                        |                          |                  |
| Described with operational precision                       | yes                    | yes                      | yes              |
| Measured to generate a quantifiable index                  | yes                    | yes                      | yes              |
| Measure is valid and replicable                            | yes                    | yes                      | yes              |
| Measurements repeated over time                            | yes                    | yes                      | no               |
| Measures assessed in terms of reliability or inter-        | yes                    | yes                      | no               |

---

observer agreement

*Independent variable*

|                                                                        |         |                |         |
|------------------------------------------------------------------------|---------|----------------|---------|
| Described with replicable precision                                    | yes     | yes            | yes     |
| Systematically manipulated and under control of experimenter           | yes     | yes            | yes     |
| Overt measure of implementation fidelity                               | no      | not applicable | no      |
| <i>Baseline</i>                                                        |         |                |         |
| Repeated measurements baseline                                         | yes     | yes            | no      |
| Described with replicable precision                                    | yes     | yes            | yes     |
| <i>Experimental control / Internal validity</i>                        |         |                |         |
| Minimum of 3 demonstrations of experimental effect at 3 points in time | yes     | yes            | no      |
| Controlling for threats to internal validity                           | unclear | yes            | unclear |
| Document a pattern of experimental control                             | yes     | yes            | yes     |
| <i>External Validity</i>                                               |         |                |         |
| Effects replicated across participants, settings, or materials         | yes     | yes            | no      |
| <i>Social validity</i>                                                 |         |                |         |
| Dependent variable is socially important                               | yes     | yes            | yes     |

---

|                                                                                                                             |     |     |     |
|-----------------------------------------------------------------------------------------------------------------------------|-----|-----|-----|
| Magnitude of change is socially important                                                                                   | yes | yes | yes |
| Implementation of independent variable is practical and cost-effective                                                      | yes | yes | yes |
| Implementation of independent variable over extended period of time, by typical intervention agents and in typical contexts | yes | yes | yes |

### Pharmacological interventions

Two double-blind placebo-controlled crossover trials and one single-case experimental reversal design evaluated pharmacological interventions for use in people with severe intellectual disabilities and mental health problems.

Aman and colleagues [32] employed within-group randomisation of order of administration of 4 week treatment with imipramine, in a dosage of 3 mg/kg/day, and 4 weeks with placebo, with one week drug-free in between. Interventions were offered to five adults with severe intellectual disabilities and depressive symptoms, in addition to a group of five adults with acting-out behaviours. The latter were not eligible for inclusion in this review as these behaviours were not considered a mental health problem. Eligible depressive symptoms were based on evidence from prior research studies and required behavioural observation instead of information obtained from diagnostic interviews. Symptoms included 'seclusion and social withdrawal, sleep loss, weight loss, tearfulness or the appearance of sad affect, and a pervasive lack of overt behavior' [31, p. 265]. Intervention effects were assessed with the Aberrant Behavior Checklist [37] and indicated imipramine to have a detrimental effect on symptoms related to irritability, lethargy, and hyperactivity, and no effect on stereotypical behaviours and inappropriate speech. Adverse effects were recorded but not described separately for the five adults with severe intellectual disabilities and depressive symptoms. For one person with affective symptoms, imipramine was found to improve behaviour and relieve chronic constipation.

White and Aman [35] evaluated the use of pimozone on maladaptive behaviours and hyperactivity, in young people and adults with moderate to profound intellectual disabilities.



Following a four-week baseline, the eight participants received two four-week treatments with either pimozide, in a dosage of 0.12 mg/kg/day, or placebo, with a one-week washout period between intervention phases. Treatment effects were evaluated using assessments with the ABC for the last three weeks of each intervention. Hyperactivity scores on the ABC reduced following the intervention, as did irritability levels, based on nurses' behaviour ratings of participants. No intervention effects were observed for ABC lethargy, stereotypy, and inappropriate speech domains. Furthermore, behavioural observations also did not identify any treatment effects.

The methodological quality of these two studies was confirmed using the CASP quality appraisal checklist (see Table 3). However, follow-up measures were notably absent and sample sizes too small to provide sufficient power for the conducted statistical analyses. Additionally, the period of treatment was of too short duration, as imipramine can take up to 6 weeks to be effective in the general population, so that intervention was of poor design.

**Table 3**

Critical Appraisal Skills Programme (CASP Checklists)[38] for studies with N > 1.

| Quality indicator                                      | Aman et al. (1986) <sup>a</sup>                 | White et al. (1985)                             |
|--------------------------------------------------------|-------------------------------------------------|-------------------------------------------------|
|                                                        |                                                 | a                                               |
| <i>Validity of the results</i>                         |                                                 |                                                 |
| Study addresses a clearly focused issue                | yes                                             | yes                                             |
| Cohort recruited in an acceptable way                  | yes                                             | yes                                             |
| Exposure accurately measured to minimise bias          | yes                                             | yes                                             |
| Outcome accurately measured to minimise bias           | yes                                             | yes                                             |
| Identification of all important confounding factors    | yes                                             | yes                                             |
| Design and/or analysis account for confounding factors | No: length of intervention too short to observe | No: length of intervention too short to observe |

|                                           |                                                                                                                    |                                                                                                                      |
|-------------------------------------------|--------------------------------------------------------------------------------------------------------------------|----------------------------------------------------------------------------------------------------------------------|
|                                           | treatment effects.                                                                                                 | treatment effects.                                                                                                   |
| Complete enough follow-up of participants | no                                                                                                                 | no                                                                                                                   |
| Long enough follow-up of participants     | no                                                                                                                 | no                                                                                                                   |
| <i>Scope of the results</i>               |                                                                                                                    |                                                                                                                      |
| Description of study results              | yes                                                                                                                | yes                                                                                                                  |
| Precision of study results                | No exact p-values,<br>no effect sizes, no<br>differentiation<br>between<br>depressive-like and<br>acting-out group | No exact p-values,<br>no effect sizes                                                                                |
| Believability of study results            | yes                                                                                                                | yes                                                                                                                  |
| <i>Impact of the results</i>              |                                                                                                                    |                                                                                                                      |
| Results applicable to local population    | Yes                                                                                                                | Yes                                                                                                                  |
| Results in line with available evidence   | no                                                                                                                 | Yes                                                                                                                  |
| Implications for practice                 | Length of<br>intervention too<br>short to draw<br>conclusions<br>regarding<br>implications                         | The study is now<br>out-dated given<br>improved<br>knowledge on the<br>risks of the long-<br>term use of the<br>drug |

---

*Note.*<sup>a</sup> CASP Checklist for Randomised Controlled Trials.

1  
2  
3 The only fully experimental single subject experimental design study evaluated the effect of  
4 haloperidol on tic frequency in a 35-year old woman with Gilles de la Tourette syndrome and severe  
5 intellectual disabilities [33]. Using an ABABA design, the dose of haloperidol was gradually increased  
6 during the intervention phases and maximal effectiveness was reached with the highest dosage of 10  
7 mg/day. Weekly behavioural observation at the community residential setting where the participant  
8 lived showed reduced tic frequencies during mealtimes, nearing zero-levels, and during waiting times.  
9 Intervention effects reversed when the dose was lowered. These findings are considered reliable due to  
10 masked assessment and reversal design, alongside the replicability of measures and intervention, see  
11 Table 2.  
12  
13  
14  
15  
16  
17  
18  
19

### 20 **Overall quality appraisal of the evidence base**

21  
22 Methodological quality of the identified studies was poor, with concern in terms of small  
23 sample sizes, lack of masked assessment, and lack of follow-up measures. By contrast, reporting  
24 standards were generally high in terms of variable descriptions and the internal and external validity of  
25 the results. Implications of the quality appraisal are integrated in the study descriptions above, whereas  
26 a detailed overview of the quality review for each study is reported in Tables 2 and 3.  
27  
28  
29  
30  
31

## 32 **DISCUSSION**

33  
34 Despite their very high rates of mental health problems, there is a lack of research in  
35 interventions that explicitly target mental health problems in people with severe and profound  
36 intellectual disabilities. The scope of this review was wide. However, only five studies were eligible  
37 for inclusion and the findings are inconclusive at best. This is highly problematic for clinicians who  
38 have to manage these disorders and can only rely upon the use of interventions designed for the  
39 general population, despite the likely limitations/inaccessibility of these for people with severe  
40 intellectual disabilities.  
41  
42  
43  
44  
45  
46  
47

48 Haloperidol was demonstrated to improve tics, but in a single person. Pimozide was reported  
49 to reduce hyperactivity and other behaviour problems [35], but it is not a recognised treatment for  
50 hyperactivity in the general population; and NICE concludes that there is no evidence that  
51 antipsychotics drugs are of use in this condition (NICE, 2016). Whilst it can calm disturbed patients in  
52 the short term through its sedative properties, it is not recommended for this use longer term in view of  
53  
54  
55  
56  
57  
58  
59

1  
2  
3 potential side-effects which includes death, with its use being reserved for schizophrenia only. Whilst  
4 meeting the inclusion criteria of the review, the study is therefore out-dated given subsequent  
5 advances in knowledge about this class of drugs. Imipramine caused deterioration of affective  
6 symptoms, but the study was poorly designed by today's standards, including the drug not being  
7 prescribed for long enough duration to be effective [32]. Additionally, the use of imipramine has  
8 declined in the whole population since the introduction of selective serotonin reuptake inhibitors in the  
9 1980s and other newer antidepressant agents, on the basis of side-effect profile. Empirical evidence for  
10 current pharmacological interventions has not yet been published.  
11  
12  
13  
14  
15  
16  
17

18 Evidence for the effectiveness of psychological interventions is also weak in the absence of  
19 controlled trials or high quality single case experimental designs (such as multiple baseline  
20 approaches). Across intervention types, two studies aimed to reduce tic frequency in people with  
21 severe intellectual disabilities and Gilles de la Tourette Syndrome yielding putative positive effects for  
22 relaxation techniques and treatment with haloperidol. Evidence relating to common mental health  
23 problems (e.g., anxiety, depression) was notably very limited. Studies including children with severe  
24 and profound intellectual disabilities involved different interventions than for studies with adults and  
25 while the geographic spread of the research was diverse, all included studies were conducted in  
26 English speaking countries. Overall, a quantitative synthesis of the evidence was not possible due to  
27 the heterogeneity of the identified studies as no two studies addressed the same mental health problem  
28 with a similar intervention or similar outcome measures. Furthermore, the total sample size across the  
29 five identified studies was only sixteen participants: nine children and seven adults, nine male and  
30 seven female. Finally, the review demonstrates that research in this area has stalled over the last  
31 decade. The most recent study we identified was published nearly two decades ago [34], whilst the  
32 methodologically stronger studies using controlled design employed outdated pharmacotherapies that  
33 are currently not recommended due to their potential side-effects [36, 39].  
34  
35  
36  
37  
38  
39  
40  
41  
42  
43  
44  
45  
46  
47  
48  
49

### 50 **Strengths and limitations**

51  
52 Strengths of this systematic review are the rigour with which it was conducted. In line with  
53 PRISMA guidelines, the prior publication of the review protocol enhances its transparency and  
54 replicability, whilst double reviewing of full-length articles and quality appraisal strengthens the  
55  
56  
57  
58  
59

1  
2  
3 findings. The current review improves upon previous reviews in this area by employing a broader  
4 scope to identify both psychological and pharmacological interventions for a range of mental health  
5 problems. In spite of this, our findings show that this area of research has received very little attention  
6 over the years with no recent treatments studies being identified and pharmacological interventions  
7 having employed drugs that would no longer comply with today's medical standards.  
8  
9

10  
11  
12 Limitations of the study relate to the search strategy. The systematic search did not include  
13 terms for every specific possible disorder or potential treatment, neither did it include a wide range of  
14 behavioural descriptions. In spite of this, we identified a considerably large number of potential  
15 records. Meanwhile, requiring at least 70% people with severe and profound intellectual disabilities to  
16 be included in a sample where outcomes are not reported separately for this group was a pragmatic  
17 decision so people with severe and profound intellectual disabilities would be sufficiently represented  
18 in the review findings. However, reducing the required proportion of participants with severe and  
19 profound intellectual disabilities to 50% would not have added any eligible studies (a post-review  
20 check completed by the first author).  
21  
22  
23  
24  
25  
26  
27  
28  
29

### 30 **Explanations and implications**

31  
32 A major challenge in mental health research for people with severe and profound intellectual  
33 disabilities, including this systematic review, lies with the selection of study outcomes. The  
34 appropriateness of measures such as the ABC [37] can be questioned when used to assess the wide  
35 spectrum of symptoms of mental health problems. However, the ABC was found to be one of the few  
36 reliable measures relating to mental health problems for individuals with severe and profound  
37 intellectual disabilities [38]. Indeed, behavioural outcomes can assess key symptoms of mental  
38 disorders according to ICD-10 criteria, but can equally be associated with distress and reduced quality  
39 of life. Whilst this diagnostic taxonomy was practical for conducting the systematic review, it may not  
40 be sufficient to evaluate all relevant interventions aimed at improving the general well-being of people  
41 with severe and profound intellectual disabilities.  
42  
43  
44  
45  
46  
47  
48  
49  
50  
51

52 The scarcity of trials addressing the mental health needs of people with severe and profound  
53 intellectual disabilities is worrisome in light of the fact that they do experience mental health  
54 problems. Yet, there is awareness of the mental health needs in this population amongst researchers  
55  
56  
57  
58  
59

1  
2  
3 and clinicians as is evident from the wide range of descriptive case reports, which did not provide  
4  
5 empirical evidence for the effectiveness of an intervention. On a positive note, the 101 studies  
6  
7 identified as including at least some individuals with severe and profound intellectual disabilities show  
8  
9 that this population is not routinely excluded from clinical practice evaluations. Although beyond the  
10  
11 objectives of this systematic review, a scoping overview of the range of interventions evaluated in  
12  
13 these studies and those being offered in routine clinical practice could help set the direction to guide  
14  
15 future research. Establishing evidence-based interventions to treat mental health problems in people  
16  
17 with severe and profound intellectual disabilities requires more research with stronger methodological  
18  
19 designs.

### 20 **Future directions**

21  
22 Challenging the status quo and developing an evidence base from which to treat people with  
23  
24 severe and profound intellectual disabilities and mental health problems is a joint responsibility of  
25  
26 practitioners and researchers. Bi-directional knowledge transfer is particularly important in this regard:  
27  
28 research into severe and profound intellectual disabilities making its way into the training of  
29  
30 practitioners, as well as practitioners highlighting difficulties in assessment and treatment that need  
31  
32 addressing. Commissioning and exploring funding opportunities to conduct research into evidence-  
33  
34 based pharmacological and psychological interventions, and an open discussion regarding the ethical  
35  
36 considerations of research involving people who may lack the capacity to consent also require  
37  
38 attention. A large inequality in evidence for effective treatments for mental health problems is  
39  
40 experienced by children and adults with severe and profound intellectual disabilities. Until this  
41  
42 inequality is adequately addressed, health services need to provide treatments found to be effective for  
43  
44 people with mild to moderate intellectual disabilities where they exist- although the availability of  
45  
46 interventions for this population is also poor in comparison to interventions for people without  
47  
48 intellectual disabilities. Particular attention should be given to how these treatments might affect  
49  
50 people with severe and profound intellectual disabilities differently regarding symptom presentation  
51  
52 and outcome assessment, accessibility of a range of psychological therapies, and side effect reporting  
53  
54 which may indicate a need for differences in dosing regimens. Keeping detailed accounts of how  
55  
56 treatments were subsequently modified will benefit the development of a more solid evidence base.  
57  
58  
59

1  
2  
3  
4  
5  
6  
7  
8  
9  
10  
11  
12  
13  
14  
15  
16  
17  
18  
19  
20  
21  
22  
23  
24  
25  
26  
27  
28  
29  
30  
31  
32  
33  
34  
35  
36  
37  
38  
39  
40  
41  
42  
43  
44  
45  
46  
47  
48  
49  
50  
51  
52  
53  
54  
55  
56  
57  
58  
59  
60

For peer review only

## Acknowledgements

We would like to express our gratitude to Professor Nigel Beail, Professor Michael Kerr and Dr Howard Ring for their contributions to the development of the research proposal.

## Funding

This work was supported by the Baily Thomas Charitable Fund (Reference number: TRUST/RNA/AC/SG/3543/6297), and was sponsored by the University of Warwick (Reference number: REGO-2015-1605).

## Conflicts of interest

The authors have no conflicts of interest to disclose.

## References

1. Hughes-McCormack LA, Ryzewska E, Henderson A, Macintyre C, Rintoul J, Cooper S-A. Prevalence of mental health conditions and relationship with general health in a whole- country population of people with intellectual disabilities compared with the general population. *Br J Psychiatry Open*. 2017;3(5):243–8.
2. Deb S, Thomas M, Bright C. Mental disorder in adults with intellectual disability. 1: Prevalence of functional psychiatric illness among a community-based population aged between 16 and 64 years. *J Intellect Disabil Res*. 2001 Dec;45(6):495–505.
3. Emerson E, Hatton C, Felce D, Murphy G. *Learning disabilities : the fundamental facts*. 2001.
4. Hulbert-Williams L, Hastings RP. Life events as a risk factor for psychological problems in individuals with intellectual disabilities: A critical review. *J Intellect Disabil Res*. 2008 Nov;52(11):883–95.
5. Cordeiro L, Ballinger E, Hagerman R, Hessler D. Clinical assessment of DSM-IV anxiety disorders in fragile X syndrome: prevalence and characterization. *J Neurodev Disord*. 2011;3(1):57–67.
6. Richards C, Moss J, O'Farrell L, Kaur G, Oliver C. Social anxiety in cornelia de lange



- 1  
2  
3 syndrome. *J Autism Dev Disord*. 2009;39(8):1155–62.
- 4  
5 7. Hyman P, Oliver C, Hall S. Compulsive Behaviors in Cornelia de Lange Syndrome. *Am J*  
6  
7 *Ment Retard*. 2002;107:146–54.
- 8  
9 8. Dykens EM. Anxiety, fears, and phobias in persons with Williams syndrome. *Dev*  
10  
11 *Neuropsychol*. 2003;23(October):291–316.
- 12  
13 9. Krefft M, Frydecka D, Adamowski T, Misiak B. From Prader–Willi syndrome to psychosis:  
14  
15 translating parent-of-origin effects into schizophrenia research. *Futur Med*. 2014;6(6):677–88.
- 16  
17 10. Cooper S-A, Smiley E, Morrison J, Williamson AW, Allan L. Mental ill-health in adults with  
18  
19 intellectual disabilities : prevalence and associated factors. *Br J Psychiatry*. 2007;190:27–36.
- 20  
21 11. Einfeld SL, Tonge BJ. Population prevalence of psychopathology in children and adolescents  
22  
23 with intellectual disability: II epidemiological findings. *J Intellect Disabil Res*. 1996;40(2):99–  
24  
25 109.
- 26  
27 12. Emerson E, Hatton C. Mental health of children and adolescents with intellectual disabilities in  
28  
29 Britain. *Br J Psychiatry*. 2007 Dec;191:493–9.
- 30  
31 13. Hove O, Havik OE. Developmental level and other factors associated with symptoms of mental  
32  
33 disorders and problem behaviour in adults with intellectual disabilities living in the community.  
34  
35 *Soc Psychiatry Psychiatr Epidemiol*. 2010;45:105–13.
- 36  
37 14. Smiley E, Cooper S-A, Finlayson J, Jackson A, Allan L, Mantry D, et al. Incidence and  
38  
39 predictors of mental ill-health in adults with intellectual disabilities: Prospective study. *Br J*  
40  
41 *Psychiatry*. 2007;191:313–9.
- 42  
43 15. Unwin GL, Tsimopoulou I, Azmi S, Stenfert Kroese B. Effectiveness of Cognitive Behavioural  
44  
45 Therapy (CBT) programmes for anxiety or depression in adults with intellectual disabilities: A  
46  
47 review of the literature. . *Res Dev Disabil*. 2016;51–52:60–75.
- 48  
49 16. Nicoll M, Beail N, Saxon D. Cognitive behavioural treatment for anger in adults with  
50  
51 intellectual disabilities: A systematic review and meta-analysis. *J Appl Res Intellect Disabil*.  
52  
53 2013 Jan;26(1):47–62.
- 54  
55 17. Vereenooghe L, Langdon PE. Psychological therapies for people with intellectual disabilities:  
56  
57 A systematic review and meta-analysis. *Res Dev Disabil*. 2013 Sep 16;34(11):4085–102.
- 58  
59  
60

18. Deb S, Chaplin R, Sohanpal S, Unwin G, Soni R, Lenotre L. The effectiveness of mood stabilizers and antiepileptic medication for the management of behaviour problems in adults with intellectual disability: a systematic review. *J Intellect Disabil Res.* 2008 Feb;52(Pt 2):107–13.
19. Deb S, Sohanpal SK, Soni R, Lenotre L, Unwin G, Lenôtre L, et al. The effectiveness of antipsychotic medication in the management of behaviour problems in adults with intellectual disabilities. *J Intellect Disabil Res.* 2007 Oct;51(10):766–77.
20. Melville CA, Johnson PCD, Smiley E, Simpson N, Purves D, McConnachie A, et al. Problem behaviours and symptom dimensions of psychiatric disorders in adults with intellectual disabilities: An exploratory and confirmatory factor analysis. *Res Dev Disabil.* 2016;55:1–13.
21. Moher D, Liberati A, Tetzlaff J, Altman DG, The PRISMA Group. Preferred reporting items for systematic reviews and meta-analyses: The PRISMA statement. *PLOS Med.* 2009;6(7):e1000097.
22. American Psychiatric Association. Diagnostic and statistic manual of mental health disorders. 4th ed. Washington, DC: American Psychiatric Publishing; 1994.
23. Felce D, Kerr M, Hastings RP. A general practice-based study of the relationship between indicators of mental illness and challenging behaviour among adults with intellectual disabilities. *J Intellect Disabil Res.* 2009;53(3):243–54.
24. American Psychiatric Association. Diagnostic and statistical manual of mental disorders. third. Washington, DC: American Psychiatric Publishing; 1980.
25. Petticrew M, Roberts H. Systematic reviews in the social sciences. A practical guide. London: Blackwell Publishing; 2006.
26. GRADE Working Group. Grading quality of evidence and strength of recommendations. *Br Med J.* 2004;328(7454):1490.
27. Balshem H, Helfand M, Schünemann HJ, Oxman AD, Kunz R, Brozek J, et al. GRADE guidelines 3: Rating the quality of the evidence. *J Clin Epidemiol.* 2011;64(4):401–6.
28. Guyatt GH, Oxman AD, Vist G, Kunz R, Brozek J, Alonso-Coello P, et al. GRADE guidelines: 4. Rating the quality of evidence—study limitations (risk of bias). *J Clin Epidemiol.*

- 2011;64(4):407–15.
29. Singh J. Critical appraisal skills programme. *J Pharmacol Pharmacother*. 2013;4:76–7.
30. Critical Appraisal Skills Programme (CASP). 2014.
31. Horner RH, Carr EG, Halle J, Mcgee G, Odom S, Wolery M. The use of single-subject research to identify evidence-based practice in special education. *Except Child*. 2005;71:165–79.
32. Aman MG, White AJ, Vaithianathan C, Teehan CJ. Preliminary study of imipramine in profoundly retarded residents. *J Autism Dev Disord*. 1986;16(3):263–73.
33. Rosenquist PB, Bodfish JW, Thompson R. Tourette Syndrome associated with mental retardation: A single-subject treatment study with haloperidol. *Am J Ment Retard*. 1997;101(5):497–504.
34. Lindauer SE, DeLeon IG, Fisher WW. Decreasing signs of negative affect and correlated self-injury in an individual with mental retardation and mood disturbances. *J Appl Behav Anal*. 1999;32(1):103–6.
35. White TJR, Aman MG. Pimozide treatment in disruptive severely retarded patients. *Aust New Zeal J Psychiatry*. 1985;19:92–4.
36. Zarkowska EC. A behavioural intervention for Gilles de la Tourette syndrome in a severely mentally handicapped girl. *J Ment Defic Res*. 1989;33(1981):245–53.
37. Aman MG, Singh NN, Stewart AW, Field CJ. The Aberrant Behavior Checklist: A behavior rating scale for the assessment of treatment effects. *Am J Ment Defic*. 1985;89(5):485–91.
38. CASP Checklists. Oxford: CASP;
39. Flynn S, Vereenoghe L, Hastings RP, Adams D, Cooper S-A, Gore N, et al. Measurement tools for mental health problems and mental well-being in people with severe or profound intellectual disabilities: A systematic review. *Clin Psychol Rev*. 2017;57:32–44.

**Authors' contributions**

RH, DA, UC, S-A C, NG, CH, KH, AJ, PEL, RMN, CO, AR, VT and JW conceived the study and acquired funding. LV and RH designed and registered the review protocol. LV and SF conducted the systematic searches, study selection and data collection. LV wrote the manuscript.

All authors provided methodological and clinical perspectives, commented on manuscript drafts and read and approved the final version of this manuscript.

For peer review only

1  
2  
3 **Figure 1.** PRISMA Flow Diagram  
4  
5  
6  
7  
8  
9  
10  
11  
12  
13  
14  
15  
16  
17  
18  
19  
20  
21  
22  
23  
24  
25  
26  
27  
28  
29  
30  
31  
32  
33  
34  
35  
36  
37  
38  
39  
40  
41  
42  
43  
44  
45  
46  
47  
48  
49  
50  
51  
52  
53  
54  
55  
56  
57  
58  
59  
60

For peer review only

**Data sharing statement**

To obtain the full search strategies for each database please contact [leen.vereenoghe@uni-bielefeld.de](mailto:leen.vereenoghe@uni-bielefeld.de) or [s.flynn.1@warwick.ac.uk](mailto:s.flynn.1@warwick.ac.uk).

This systematic review presents previously published data. Please refer to the original articles and their authors for these research data.

For peer review only

1  
2  
3  
4  
5  
6  
7  
8  
9  
10  
11  
12  
13  
14  
15  
16  
17  
18  
19  
20  
21  
22  
23  
24  
25  
26  
27  
28  
29  
30  
31  
32  
33  
34  
35  
36  
37  
38  
39  
40  
41  
42  
43  
44  
45  
46  
47  
48  
49  
50  
51  
52  
53  
54  
55  
56  
57  
58  
59  
60

For peer review only



Figure 1. PRISMA Flow Diagram

244x155mm (300 x 300 DPI)



## Appendix

**Table 1**

Search strategy for simultaneous database searches of PsycINFO, PsycTESTS and ASSIA using ProQuest database host.

| Search terms                                                                                                                                                                                                                                                                                                                                                                                                                                       | Results |
|----------------------------------------------------------------------------------------------------------------------------------------------------------------------------------------------------------------------------------------------------------------------------------------------------------------------------------------------------------------------------------------------------------------------------------------------------|---------|
| <i>Intellectual disabilities</i>                                                                                                                                                                                                                                                                                                                                                                                                                   |         |
| 1 SU.EXACT.EXPLODE("Intellectual Development Disorder")                                                                                                                                                                                                                                                                                                                                                                                            | 37548   |
| 2 TI(mental* NEAR/3 (disab* OR impair* OR handicap* OR subnormal* OR deficien* OR retard*)) OR AB(mental* NEAR/3 (disab* OR impair* OR handicap* OR subnormal* OR deficien* OR retard*))                                                                                                                                                                                                                                                           | 38279   |
| 3 TI(learning NEAR/3 (disab* OR impair* OR difficult* OR disorder)) OR AB(learning NEAR/3 (disab* OR impair* OR difficult* OR disorder))                                                                                                                                                                                                                                                                                                           | 36985   |
| 4 TI(moron OR imbecile OR feeble-minded OR subnormal OR retard) OR AB(moron OR imbecile OR feeble-minded OR subnormal OR retard)                                                                                                                                                                                                                                                                                                                   | 4289    |
| 5 TI(intellect* NEAR/3 (disab* OR impair* OR handicap* OR disorder* OR subnormal* OR deficien*)) OR AB(intellect* NEAR/3 (disab* OR impair* OR handicap* OR disorder* OR subnormal* OR deficien*))                                                                                                                                                                                                                                                 | 16059   |
| 6 TI((Down* OR "Smith-Magenis" OR Rett* OR "Lesch-Nyhan" OR "Prader-Willi" OR Angelman OR "fragile X" OR "Cri-du-chat" OR "Cornelia de Lange" OR "de Lange" OR "Rubinstein-Taybi" OR velocardiofacial) NEAR/3 syndrome*) OR AB((Down* OR "Smith-Magenis" OR Rett* OR "Lesch-Nyhan" OR "Prader-Willi" OR Angelman OR "fragile X" OR "Cri-du-chat" OR "Cornelia de Lange" OR "de Lange" OR "Rubinstein-Taybi" OR velocardiofacial) NEAR/3 syndrome*) | 11067   |
| 7 OR/ 1-6                                                                                                                                                                                                                                                                                                                                                                                                                                          | 105392  |
| <i>Mental health</i>                                                                                                                                                                                                                                                                                                                                                                                                                               |         |

1  
2  
3  
4  
5  
6  
7  
8  
9  
10  
11  
12  
13  
14  
15  
16  
17  
18  
19  
20  
21  
22  
23  
24  
25  
26  
27  
28  
29  
30  
31  
32  
33  
34  
35  
36  
37  
38  
39  
40  
41  
42  
43  
44  
45  
46  
47  
48  
49  
50  
51  
52  
53  
54  
55  
56  
57  
58  
59  
60

---

|    |                                                                                                                                                                                                                                                                                                                                                                                                           |        |
|----|-----------------------------------------------------------------------------------------------------------------------------------------------------------------------------------------------------------------------------------------------------------------------------------------------------------------------------------------------------------------------------------------------------------|--------|
| 8  | SU.EXACT.EXPLODE("Depression (Emotion)")                                                                                                                                                                                                                                                                                                                                                                  | 22448  |
| 9  | SU.EXACT.EXPLODE("Anxiety Disorders") OR<br>SU.EXACT.EXPLODE("Generalized Anxiety Disorder") OR<br>SU.EXACT.EXPLODE("Anxiety") OR SU.EXACT.EXPLODE("Social<br>Anxiety")                                                                                                                                                                                                                                   | 124637 |
| 10 | TI(anger NEAR/3 (problem* OR disorder*)) OR AB(anger NEAR/3 (problem*<br>OR disorder*))                                                                                                                                                                                                                                                                                                                   | 1212   |
| 11 | TI(anxiet* OR anxious* OR gad* OR phobia* OR phobic* OR trauma* OR<br>posttraum* OR ptsd OR psychotraum*) OR AB(anxiet* OR anxious* OR gad*<br>OR phobia* OR phobic* OR trauma* OR posttraum* OR ptsd OR<br>psychotraum*)                                                                                                                                                                                 | 272855 |
| 12 | TI(mental* NEAR/2 (ill* OR disorder* OR problem* OR health* OR well*))<br>OR AB(mental* NEAR/2 (ill* OR disorder* OR problem* OR health* OR<br>well*))                                                                                                                                                                                                                                                    | 226542 |
| 13 | TI(depress* NEAR/2 (disorder* OR symptom* OR behavio* OR thought*) OR<br>depression OR affective disorder* OR emotion* NEAR/2 (disorder* OR<br>problem*) OR dysthymi* OR dysphori* OR melanchol*) OR AB(depress*<br>NEAR/2 (disorder* OR symptom* OR behavio* OR thought*) OR depression<br>OR affective disorder* OR emotion* NEAR/2 (disorder* OR problem*) OR<br>dysthymi* OR dysphori* OR melanchol*) | 273779 |
| 14 | OR/ 8-13<br><br><i>Mental well-being</i>                                                                                                                                                                                                                                                                                                                                                                  | 655607 |
| 15 | TI(psycho* NEAR/2 function*) OR AB(psycho* NEAR/2 function*)                                                                                                                                                                                                                                                                                                                                              | 23372  |
| 16 | TI(well* OR health*)                                                                                                                                                                                                                                                                                                                                                                                      | 207285 |

---

|                                    |                                                                                                                                                                                                                                                                 |        |
|------------------------------------|-----------------------------------------------------------------------------------------------------------------------------------------------------------------------------------------------------------------------------------------------------------------|--------|
| 17                                 | TI((mental* OR psycholog* OR psychosoc*) NEAR/2 (health* OR well*)) OR<br>AB((mental* OR psycholog* OR psychosoc*) NEAR/2 (health* OR well*))                                                                                                                   | 193401 |
| 18                                 | TI(quality NEAR/2 life)                                                                                                                                                                                                                                         | 19555  |
| 19                                 | OR/ 15-18                                                                                                                                                                                                                                                       | 358684 |
| <i>Psychological interventions</i> |                                                                                                                                                                                                                                                                 |        |
| 20                                 | TI((psychological N/3 therap*) OR psychotherap* OR counsel*) OR<br>AB((psychological N/3 therap*) OR psychotherap* OR counsel*)                                                                                                                                 | 196693 |
| 21                                 | TI(psychoanaly* OR psychodynamic*) OR AB(psychoanaly* OR<br>psychodynamic*)                                                                                                                                                                                     | 90160  |
| 22                                 | TI((behavior* OR behaviour* OR cognitive) N/2 therap*) OR AB((behavior*<br>OR behaviour* OR cognitive) N/2 therap*)                                                                                                                                             | 39534  |
| 23                                 | TI((family OR interpersonal OR systemic OR “client centered” OR “client<br>centred” OR narrative OR relational) N/2 therap*) OR AB((family OR<br>interpersonal OR systemic OR “client centered” OR “client centred” OR<br>narrative OR relational) N/2 therap*) | 25851  |
| 24                                 | TI((supportive OR talking OR solution*focused OR emotion*focused OR non-<br>pharmacological) N/2 therap*) OR AB((supportive OR talking OR<br>solution*focused OR emotion*focused OR non-pharmacological) N/2 therap*)                                           | 1984   |
| 25                                 | TI(dialectical behavio*r therap* OR mindfulness* OR “acceptance and<br>commitment” OR “rational emotive”) OR AB(dialectical behavio*r therap* OR<br>mindfulness* OR “acceptance and commitment” OR “rational emotive”)                                          | 10630  |
| 26                                 | TI((group OR individual) N/2 therap*) OR AB((group OR individual) N/2<br>therap*)                                                                                                                                                                               | 25884  |
| 27                                 | TI(anger N/2 (manag* OR train*)) OR AB(anger N/2 (manag* OR train*))                                                                                                                                                                                            | 1612   |

|    |                                                                               |        |
|----|-------------------------------------------------------------------------------|--------|
| 1  |                                                                               |        |
| 2  |                                                                               |        |
| 3  | 28                                                                            | 17343  |
| 4  | TI((play OR art OR relax* OR music OR dance OR creative OR drama OR           |        |
| 5  | activity) N/2 therap*) OR AB((play OR art OR relax* OR music OR dance OR      |        |
| 6  | creative OR drama OR activity) N/2 therap*)                                   |        |
| 7  |                                                                               |        |
| 8  |                                                                               |        |
| 9  |                                                                               |        |
| 10 | 29                                                                            | 342375 |
| 11 | OR/ 20-28                                                                     |        |
| 12 | <i>Pharmacological interventions</i>                                          |        |
| 13 |                                                                               |        |
| 14 | 30                                                                            | 49958  |
| 15 | TI(pharmacotherapy* OR pharmacolog* OR pharmacological therap*) OR            |        |
| 16 | AB(pharmacotherapy* OR pharmacolog* OR pharmacological therap*)               |        |
| 17 |                                                                               |        |
| 18 |                                                                               |        |
| 19 | 31                                                                            | 41884  |
| 20 | TI(antipsychotic* OR anti-psychotic* OR psychotrop* OR psychopharmac*)        |        |
| 21 | OR AB(antipsychotic* OR anti-psychotic* OR psychotrop* OR                     |        |
| 22 | psychopharmac*)                                                               |        |
| 23 |                                                                               |        |
| 24 |                                                                               |        |
| 25 |                                                                               |        |
| 26 | 32                                                                            | 6622   |
| 27 | TI(atypical N/2 (antipsychotic* OR anti-psychotic* OR psychotrop*)) OR        |        |
| 28 | AB(atypical N/2 (antipsychotic* OR anti-psychotic* OR psychotrop*))           |        |
| 29 |                                                                               |        |
| 30 |                                                                               |        |
| 31 | 33                                                                            | 34457  |
| 32 | TI(tricyclic antidepressant OR anti-depress* OR antidepress*) OR AB(tricyclic |        |
| 33 | antidepressant OR anti-depress* OR antidepress*)                              |        |
| 34 |                                                                               |        |
| 35 |                                                                               |        |
| 36 | 34                                                                            | 1905   |
| 37 | TI(adrenergic blocking drugs OR monoamine oxidase inhibitors) OR              |        |
| 38 | AB(adrenergic blocking drugs OR monoamine oxidase inhibitors)                 |        |
| 39 |                                                                               |        |
| 40 | 35                                                                            | 7153   |
| 41 | TI(anxiolytic* OR antipanic* OR antianxiety ) OR AB(anxiolytic* OR            |        |
| 42 | antipanic* OR antianxiety )                                                   |        |
| 43 |                                                                               |        |
| 44 |                                                                               |        |
| 45 | 36                                                                            | 4142   |
| 46 | TI(anticonvulsant*) OR AB(anticonvulsant*)                                    |        |
| 47 |                                                                               |        |
| 48 |                                                                               |        |
| 49 | 37                                                                            | 12261  |
| 50 | TI(lithium*OR lithium carbonate OR SSRI* OR “selective serotonin reuptake     |        |
| 51 | inhibitor” OR serotonin reuptake inhibitor OR serotonin antagonist) OR        |        |
| 52 | AB(lithium*OR lithium carbonate OR SSRI* OR “selective serotonin reuptake     |        |
| 53 | inhibitor” OR serotonin reuptake inhibitor OR serotonin antagonist)           |        |
| 54 |                                                                               |        |
| 55 |                                                                               |        |
| 56 |                                                                               |        |
| 57 |                                                                               |        |
| 58 |                                                                               |        |
| 59 |                                                                               |        |
| 60 |                                                                               |        |

|    |                                                                          |        |
|----|--------------------------------------------------------------------------|--------|
| 1  |                                                                          |        |
| 2  |                                                                          |        |
| 3  | 38                                                                       | 61771  |
| 4  | TI(risperidone OR olanzapine OR clozapine* OR Leponex OR Denzapine OR    |        |
| 5  | Zaponex OR citalopram OR escitalopram OR fluoxetine OR fluvoxamine OR    |        |
| 6  | paroxetine OR sertraline OR trazodone OR clomipramine OR amoxapine OR    |        |
| 7  | isocarboxazid OR phenelzine OR tranylcypromine OR moclobemide OR         |        |
| 8  | amoxapine OR bupropion OR sulpiride OR maprotiline OR imipramine OR      |        |
| 9  | clomipramine OR desipramine OR opipramol OR doxepin OR amitriptyline OR  |        |
| 10 | lofepramine OR nortriptyline OR benzodiazepine* OR alprazolam OR         |        |
| 11 | clonazepam OR diazepam OR temazepam OR melatonin OR methylphenidate      |        |
| 12 | OR sodium valproate OR carbamazepine OR lamotrigine) OR AB(risperidone   |        |
| 13 | OR olanzapine OR clozapine* OR Leponex OR Denzapine OR Zaponex OR        |        |
| 14 | citalopram OR escitalopram OR fluoxetine OR fluvoxamine OR paroxetine OR |        |
| 15 | sertraline OR trazodone OR clomipramine OR amoxapine OR isocarboxazid OR |        |
| 16 | phenelzine OR tranylcypromine OR moclobemide OR amoxapine OR bupropion   |        |
| 17 | OR sulpiride OR maprotiline OR imipramine OR clomipramine OR desipramine |        |
| 18 | OR opipramol OR doxepin OR amitriptyline OR lofepramine OR nortriptyline |        |
| 19 | OR benzodiazepine* OR alprazolam OR clonazepam OR diazepam OR            |        |
| 20 | temazepam OR melatonin OR methylphenidate OR sodium valproate OR         |        |
| 21 | carbamazepine OR lamotrigine)                                            |        |
| 22 |                                                                          |        |
| 23 |                                                                          |        |
| 24 | 39                                                                       | 153952 |
| 25 | OR/ 30-38                                                                |        |
| 26 |                                                                          |        |
| 27 | <i>Final search string</i>                                               |        |
| 28 |                                                                          |        |
| 29 | 40                                                                       | 2607   |
| 30 | 7 AND (14 OR 19) AND (29 OR 39)                                          |        |
| 31 |                                                                          |        |
| 32 |                                                                          |        |
| 33 |                                                                          |        |
| 34 |                                                                          |        |
| 35 |                                                                          |        |
| 36 |                                                                          |        |
| 37 |                                                                          |        |
| 38 |                                                                          |        |
| 39 |                                                                          |        |
| 40 |                                                                          |        |
| 41 |                                                                          |        |
| 42 |                                                                          |        |
| 43 |                                                                          |        |
| 44 |                                                                          |        |
| 45 |                                                                          |        |
| 46 |                                                                          |        |
| 47 |                                                                          |        |
| 48 |                                                                          |        |
| 49 |                                                                          |        |
| 50 |                                                                          |        |
| 51 |                                                                          |        |
| 52 |                                                                          |        |
| 53 |                                                                          |        |
| 54 |                                                                          |        |
| 55 |                                                                          |        |
| 56 |                                                                          |        |
| 57 |                                                                          |        |
| 58 |                                                                          |        |
| 59 |                                                                          |        |
| 60 |                                                                          |        |

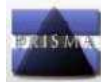

# PRISMA 2009 Checklist

| Section/topic                      | #  | Checklist item                                                                                                                                                                                                                                                                                              | Reported on page # |
|------------------------------------|----|-------------------------------------------------------------------------------------------------------------------------------------------------------------------------------------------------------------------------------------------------------------------------------------------------------------|--------------------|
| <b>TITLE</b>                       |    |                                                                                                                                                                                                                                                                                                             |                    |
| Title                              | 1  | Identify the report as a systematic review, meta-analysis, or both.                                                                                                                                                                                                                                         | 1                  |
| <b>ABSTRACT</b>                    |    |                                                                                                                                                                                                                                                                                                             |                    |
| Structured summary                 | 2  | Provide a structured summary including, as applicable: background; objectives; data sources; study eligibility criteria, participants, and interventions; study appraisal and synthesis methods; results; limitations; conclusions and implications of key findings; systematic review registration number. | 2                  |
| <b>INTRODUCTION</b>                |    |                                                                                                                                                                                                                                                                                                             |                    |
| Rationale                          | 3  | Describe the rationale for the review in the context of what is already known.                                                                                                                                                                                                                              | 6                  |
| Objectives                         | 4  | Provide an explicit statement of questions being addressed with reference to participants, interventions, comparisons, outcomes, and study design (PICOS).                                                                                                                                                  | 6                  |
| <b>METHODS</b>                     |    |                                                                                                                                                                                                                                                                                                             |                    |
| Protocol and registration          | 5  | Indicate if a review protocol exists, if and where it can be accessed (e.g., Web address), and, if available, provide registration information including registration number.                                                                                                                               | 6                  |
| Eligibility criteria               | 6  | Specify study characteristics (e.g., PICOS, length of follow-up) and report characteristics (e.g., years considered, language, publication status) used as criteria for eligibility, giving rationale.                                                                                                      | 7                  |
| Information sources                | 7  | Describe all information sources (e.g., databases with dates of coverage, contact with study authors to identify additional studies) in the search and date last searched.                                                                                                                                  | 7                  |
| Search                             | 8  | Present full electronic search strategy for at least one database, including any limits used, such that it could be repeated.                                                                                                                                                                               | Appendix           |
| Study selection                    | 9  | State the process for selecting studies (i.e., screening, eligibility, included in systematic review, and, if applicable, included in the meta-analysis).                                                                                                                                                   | 9                  |
| Data collection process            | 10 | Describe method of data extraction from reports (e.g., piloted forms, independently, in duplicate) and any processes for obtaining and confirming data from investigators.                                                                                                                                  | 10                 |
| Data items                         | 11 | List and define all variables for which data were sought (e.g., PICOS, funding sources) and any assumptions and simplifications made.                                                                                                                                                                       | 10                 |
| Risk of bias in individual studies | 12 | Describe methods used for assessing risk of bias of individual studies (including specification of whether this was done at the study or outcome level), and how this information is to be used in any data synthesis.                                                                                      | 10                 |
| Summary measures                   | 13 | State the principal summary measures (e.g., risk ratio, difference in means).                                                                                                                                                                                                                               | n/a                |
| Synthesis of results               | 14 | Describe the methods of handling data and combining results of studies, if done, including measures of consistency (e.g., $I^2$ ) for each meta-analysis.                                                                                                                                                   | n/a                |

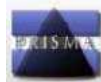

# PRISMA 2009 Checklist

Page 1 of 2

| Section/topic                 | #  | Checklist item                                                                                                                                                                                           | Reported on page # |
|-------------------------------|----|----------------------------------------------------------------------------------------------------------------------------------------------------------------------------------------------------------|--------------------|
| Risk of bias across studies   | 15 | Specify any assessment of risk of bias that may affect the cumulative evidence (e.g., publication bias, selective reporting within studies).                                                             | n/a                |
| Additional analyses           | 16 | Describe methods of additional analyses (e.g., sensitivity or subgroup analyses, meta-regression), if done, indicating which were pre-specified.                                                         | n/a                |
| <b>RESULTS</b>                |    |                                                                                                                                                                                                          |                    |
| Study selection               | 17 | Give numbers of studies screened, assessed for eligibility, and included in the review, with reasons for exclusions at each stage, ideally with a flow diagram.                                          | 10                 |
| Study characteristics         | 18 | For each study, present characteristics for which data were extracted (e.g., study size, PICOS, follow-up period) and provide the citations.                                                             | 12                 |
| Risk of bias within studies   | 19 | Present data on risk of bias of each study and, if available, any outcome level assessment (see item 12).                                                                                                | 17, 20             |
| Results of individual studies | 20 | For all outcomes considered (benefits or harms), present, for each study: (a) simple summary data for each intervention group (b) effect estimates and confidence intervals, ideally with a forest plot. | 16, 19, 20         |
| Synthesis of results          | 21 | Present results of each meta-analysis done, including confidence intervals and measures of consistency.                                                                                                  | n/a                |
| Risk of bias across studies   | 22 | Present results of any assessment of risk of bias across studies (see Item 15).                                                                                                                          | n/a                |
| Additional analysis           | 23 | Give results of additional analyses, if done (e.g., sensitivity or subgroup analyses, meta-regression [see Item 16]).                                                                                    | n/a                |
| <b>DISCUSSION</b>             |    |                                                                                                                                                                                                          |                    |
| Summary of evidence           | 24 | Summarize the main findings including the strength of evidence for each main outcome; consider their relevance to key groups (e.g., healthcare providers, users, and policy makers).                     | 22-23              |
| Limitations                   | 25 | Discuss limitations at study and outcome level (e.g., risk of bias), and at review-level (e.g., incomplete retrieval of identified research, reporting bias).                                            | 24                 |
| Conclusions                   | 26 | Provide a general interpretation of the results in the context of other evidence, and implications for future research.                                                                                  | 25                 |
| <b>FUNDING</b>                |    |                                                                                                                                                                                                          |                    |
| Funding                       | 27 | Describe sources of funding for the systematic review and other support (e.g., supply of data); role of funders for the systematic review.                                                               | 27                 |

From: Moher D, Liberati A, Tetzlaff J, Altman DG, The PRISMA Group (2009). Preferred Reporting Items for Systematic Reviews and Meta-Analyses: The PRISMA Statement. PLoS Med 6(7): e1000097. doi:10.1371/journal.pmed1000097

For more information, visit: [www.prisma-statement.org](http://www.prisma-statement.org).

Page 2 of 2

For peer review only - <http://bmjopen.bmj.com/site/about/guidelines.xhtml>
