# Supplementary material for: Interventions for mental health problems in children and adults with severe intellectual disabilities: a systematic review
Source: PubMed Central journal article supplement — BMJ Open. 2018 Jun 19;8(6):e021911. doi: 10.1136/bmjopen-2018-021911 (PMC6020952; doi:10.1136/bmjopen-2018-021911), 2018-06-19
Supplement: bmjopen-2018-021911supp001.pdf [file bmjopen-2018-021911supp001.pdf]

## Appendix

**Table 1**

Search strategy for simultaneous database searches of PsycINFO, PsycTESTS and ASSIA using ProQuest database host.

| Search terms                                                                                                                                                                                                                                                                                                                                                                                                                                       | Results |
|----------------------------------------------------------------------------------------------------------------------------------------------------------------------------------------------------------------------------------------------------------------------------------------------------------------------------------------------------------------------------------------------------------------------------------------------------|---------|
| <i>Intellectual disabilities</i>                                                                                                                                                                                                                                                                                                                                                                                                                   |         |
| 1 SU.EXACT.EXPLODE("Intellectual Development Disorder")                                                                                                                                                                                                                                                                                                                                                                                            | 37548   |
| 2 TI(mental* NEAR/3 (disab* OR impair* OR handicap* OR subnormal* OR deficien* OR retard*)) OR AB(mental* NEAR/3 (disab* OR impair* OR handicap* OR subnormal* OR deficien* OR retard*))                                                                                                                                                                                                                                                           | 38279   |
| 3 TI(learning NEAR/3 (disab* OR impair* OR difficult* OR disorder)) OR AB(learning NEAR/3 (disab* OR impair* OR difficult* OR disorder))                                                                                                                                                                                                                                                                                                           | 36985   |
| 4 TI(moron OR imbecile OR feeble-minded OR subnormal OR retard) OR AB(moron OR imbecile OR feeble-minded OR subnormal OR retard)                                                                                                                                                                                                                                                                                                                   | 4289    |
| 5 TI(intellect* NEAR/3 (disab* OR impair* OR handicap* OR disorder* OR subnormal* OR deficien*)) OR AB(intellect* NEAR/3 (disab* OR impair* OR handicap* OR disorder* OR subnormal* OR deficien*))                                                                                                                                                                                                                                                 | 16059   |
| 6 TI((Down* OR "Smith-Magenis" OR Rett* OR "Lesch-Nyhan" OR "Prader-Willi" OR Angelman OR "fragile X" OR "Cri-du-chat" OR "Cornelia de Lange" OR "de Lange" OR "Rubinstein-Taybi" OR velocardiofacial) NEAR/3 syndrome*) OR AB((Down* OR "Smith-Magenis" OR Rett* OR "Lesch-Nyhan" OR "Prader-Willi" OR Angelman OR "fragile X" OR "Cri-du-chat" OR "Cornelia de Lange" OR "de Lange" OR "Rubinstein-Taybi" OR velocardiofacial) NEAR/3 syndrome*) | 11067   |
| 7 OR/ 1-6                                                                                                                                                                                                                                                                                                                                                                                                                                          | 105392  |
| <i>Mental health</i>                                                                                                                                                                                                                                                                                                                                                                                                                               |         |

---

|    |                                                                                                                                                                                                                                                                                                                                                                                                           |        |
|----|-----------------------------------------------------------------------------------------------------------------------------------------------------------------------------------------------------------------------------------------------------------------------------------------------------------------------------------------------------------------------------------------------------------|--------|
| 8  | SU.EXACT.EXPLODE("Depression (Emotion)")                                                                                                                                                                                                                                                                                                                                                                  | 22448  |
| 9  | SU.EXACT.EXPLODE("Anxiety Disorders") OR<br>SU.EXACT.EXPLODE("Generalized Anxiety Disorder") OR<br>SU.EXACT.EXPLODE("Anxiety") OR SU.EXACT.EXPLODE("Social<br>Anxiety")                                                                                                                                                                                                                                   | 124637 |
| 10 | TI(anger NEAR/3 (problem* OR disorder*)) OR AB(anger NEAR/3 (problem*<br>OR disorder*))                                                                                                                                                                                                                                                                                                                   | 1212   |
| 11 | TI(anxiet* OR anxious* OR gad* OR phobia* OR phobic* OR trauma* OR<br>posttraum* OR ptsd OR psychotraum*) OR AB(anxiet* OR anxious* OR gad*<br>OR phobia* OR phobic* OR trauma* OR posttraum* OR ptsd OR<br>psychotraum*)                                                                                                                                                                                 | 272855 |
| 12 | TI(mental* NEAR/2 (ill* OR disorder* OR problem* OR health* OR well*))<br>OR AB(mental* NEAR/2 (ill* OR disorder* OR problem* OR health* OR<br>well*))                                                                                                                                                                                                                                                    | 226542 |
| 13 | TI(depress* NEAR/2 (disorder* OR symptom* OR behavio* OR thought*) OR<br>depression OR affective disorder* OR emotion* NEAR/2 (disorder* OR<br>problem*) OR dysthymi* OR dysphori* OR melanchol*) OR AB(depress*<br>NEAR/2 (disorder* OR symptom* OR behavio* OR thought*) OR depression<br>OR affective disorder* OR emotion* NEAR/2 (disorder* OR problem*) OR<br>dysthymi* OR dysphori* OR melanchol*) | 273779 |
| 14 | OR/ 8-13<br><br><i>Mental well-being</i>                                                                                                                                                                                                                                                                                                                                                                  | 655607 |
| 15 | TI(psycho* NEAR/2 function*) OR AB(psycho* NEAR/2 function*)                                                                                                                                                                                                                                                                                                                                              | 23372  |
| 16 | TI(well* OR health*)                                                                                                                                                                                                                                                                                                                                                                                      | 207285 |

---

---

|                                    |                                                                                                                                                                                                                                                                 |        |
|------------------------------------|-----------------------------------------------------------------------------------------------------------------------------------------------------------------------------------------------------------------------------------------------------------------|--------|
| 17                                 | TI((mental* OR psycholog* OR psychosoc*) NEAR/2 (health* OR well*)) OR<br>AB((mental* OR psycholog* OR psychosoc*) NEAR/2 (health* OR well*))                                                                                                                   | 193401 |
| 18                                 | TI(quality NEAR/2 life)                                                                                                                                                                                                                                         | 19555  |
| 19                                 | OR/ 15-18                                                                                                                                                                                                                                                       | 358684 |
| <i>Psychological interventions</i> |                                                                                                                                                                                                                                                                 |        |
| 20                                 | TI((psychological N/3 therap*) OR psychotherap* OR counsel*) OR<br>AB((psychological N/3 therap*) OR psychotherap* OR counsel*)                                                                                                                                 | 196693 |
| 21                                 | TI(psychoanaly* OR psychodynamic*) OR AB(psychoanaly* OR<br>psychodynamic*)                                                                                                                                                                                     | 90160  |
| 22                                 | TI((behavior* OR behaviour* OR cognitive) N/2 therap*) OR AB((behavior*<br>OR behaviour* OR cognitive) N/2 therap*)                                                                                                                                             | 39534  |
| 23                                 | TI((family OR interpersonal OR systemic OR “client centered” OR “client<br>centred” OR narrative OR relational) N/2 therap*) OR AB((family OR<br>interpersonal OR systemic OR “client centered” OR “client centred” OR<br>narrative OR relational) N/2 therap*) | 25851  |
| 24                                 | TI((supportive OR talking OR solution*focused OR emotion*focused OR non-<br>pharmacological) N/2 therap*) OR AB((supportive OR talking OR<br>solution*focused OR emotion*focused OR non-pharmacological) N/2 therap*)                                           | 1984   |
| 25                                 | TI(dialectical behavio*r therap* OR mindfulness* OR “acceptance and<br>commitment” OR “rational emotive”) OR AB(dialectical behavio*r therap* OR<br>mindfulness* OR “acceptance and commitment” OR “rational emotive”)                                          | 10630  |
| 26                                 | TI((group OR individual) N/2 therap*) OR AB((group OR individual) N/2<br>therap*)                                                                                                                                                                               | 25884  |
| 27                                 | TI(anger N/2 (manag* OR train*)) OR AB(anger N/2 (manag* OR train*))                                                                                                                                                                                            | 1612   |

---

---

|                                      |                                                                                                                                                                                                                                                                                                |        |
|--------------------------------------|------------------------------------------------------------------------------------------------------------------------------------------------------------------------------------------------------------------------------------------------------------------------------------------------|--------|
| 28                                   | TI((play OR art OR relax* OR music OR dance OR creative OR drama OR activity) N/2 therap*) OR AB((play OR art OR relax* OR music OR dance OR creative OR drama OR activity) N/2 therap*)                                                                                                       | 17343  |
| 29                                   | OR/ 20-28                                                                                                                                                                                                                                                                                      | 342375 |
| <i>Pharmacological interventions</i> |                                                                                                                                                                                                                                                                                                |        |
| 30                                   | TI(pharmacotherapy* OR pharmacolog* OR pharmacological therap*) OR AB(pharmacotherapy* OR pharmacolog* OR pharmacological therap*)                                                                                                                                                             | 49958  |
| 31                                   | TI(antipsychotic* OR anti-psychotic* OR psychotrop* OR psychopharmac*) OR AB(antipsychotic* OR anti-psychotic* OR psychotrop* OR psychopharmac*)                                                                                                                                               | 41884  |
| 32                                   | TI(atypical N/2 (antipsychotic* OR anti-psychotic* OR psychotrop*)) OR AB(atypical N/2 (antipsychotic* OR anti-psychotic* OR psychotrop*))                                                                                                                                                     | 6622   |
| 33                                   | TI(tricyclic antidepressant OR anti-depress* OR antidepress*) OR AB(tricyclic antidepressant OR anti-depress* OR antidepress*)                                                                                                                                                                 | 34457  |
| 34                                   | TI(adrenergic blocking drugs OR monoamine oxidase inhibitors) OR AB(adrenergic blocking drugs OR monoamine oxidase inhibitors)                                                                                                                                                                 | 1905   |
| 35                                   | TI(anxiolytic* OR antipanic* OR antianxiety ) OR AB(anxiolytic* OR antipanic* OR antianxiety )                                                                                                                                                                                                 | 7153   |
| 36                                   | TI(anticonvulsant*) OR AB(anticonvulsant*)                                                                                                                                                                                                                                                     | 4142   |
| 37                                   | TI(lithium*OR lithium carbonate OR SSRI* OR “selective serotonin reuptake inhibitor” OR serotonin reuptake inhibitor OR serotonin antagonist) OR AB(lithium*OR lithium carbonate OR SSRI* OR “selective serotonin reuptake inhibitor” OR serotonin reuptake inhibitor OR serotonin antagonist) | 12261  |

---

---

|    |                                                                                                                                                                                                                                                                                                                                                                                                                                                                                                                                                                                                                                                                                                                                                                                                                                                                                                                                                                                                                                                                                                                                                                                                                                                             |        |
|----|-------------------------------------------------------------------------------------------------------------------------------------------------------------------------------------------------------------------------------------------------------------------------------------------------------------------------------------------------------------------------------------------------------------------------------------------------------------------------------------------------------------------------------------------------------------------------------------------------------------------------------------------------------------------------------------------------------------------------------------------------------------------------------------------------------------------------------------------------------------------------------------------------------------------------------------------------------------------------------------------------------------------------------------------------------------------------------------------------------------------------------------------------------------------------------------------------------------------------------------------------------------|--------|
| 38 | <p>TI(risperidone OR olanzapine OR clozapine* OR Leponex OR Denzapine OR Zaponex OR citalopram OR escitalopram OR fluoxetine OR fluvoxamine OR paroxetine OR sertraline OR trazodone OR clomipramine OR amoxapine OR isocarboxazid OR phenelzine OR tranylcypromine OR moclobemide OR amoxapine OR bupropion OR sulpiride OR maprotiline OR imipramine OR clomipramine OR desipramine OR opipramol OR doxepin OR amitriptyline OR lofepramine OR nortriptyline OR benzodiazepine* OR alprazolam OR clonazepam OR diazepam OR temazepam OR melatonin OR methylphenidate OR sodium valproate OR carbamazepine OR lamotrigine) OR AB(risperidone OR olanzapine OR clozapine* OR Leponex OR Denzapine OR Zaponex OR citalopram OR escitalopram OR fluoxetine OR fluvoxamine OR paroxetine OR sertraline OR trazodone OR clomipramine OR amoxapine OR isocarboxazid OR phenelzine OR tranylcypromine OR moclobemide OR amoxapine OR bupropion OR sulpiride OR maprotiline OR imipramine OR clomipramine OR desipramine OR opipramol OR doxepin OR amitriptyline OR lofepramine OR nortriptyline OR benzodiazepine* OR alprazolam OR clonazepam OR diazepam OR temazepam OR melatonin OR methylphenidate OR sodium valproate OR carbamazepine OR lamotrigine)</p> | 61771  |
| 39 | OR/ 30-38                                                                                                                                                                                                                                                                                                                                                                                                                                                                                                                                                                                                                                                                                                                                                                                                                                                                                                                                                                                                                                                                                                                                                                                                                                                   | 153952 |
|    | <i>Final search string</i>                                                                                                                                                                                                                                                                                                                                                                                                                                                                                                                                                                                                                                                                                                                                                                                                                                                                                                                                                                                                                                                                                                                                                                                                                                  |        |
| 40 | 7 AND (14 OR 19) AND (29 OR 39)                                                                                                                                                                                                                                                                                                                                                                                                                                                                                                                                                                                                                                                                                                                                                                                                                                                                                                                                                                                                                                                                                                                                                                                                                             | 2607   |

---
